# Supplementary material for: Interaction between Conjugative and Retrotransposable Elements in Horizontal Gene Transfer
Source: PubMed Central journal article supplement (PMC4256276; doi:10.1371/journal.pgen.1004853), 2014-12-04
Supplement: pgen.1004853.s001.pdf [file pgen.1004853.s001.pdf]

## Supplementary Materials:

### Supplementary Figure Legends

**Figure S1.** Effect of relaxase mutations on retrotransposition.

(A) Results of retrotransposition assays using mutants of D-pLtrB. The mutation in the catalytic tyrosine (likely Y21 in LtrB; GenBank: AAB06502), results in a 4-fold reduction in RTP frequency with alanine (strain Y21A) or phenylalanine (Y21F) substitutions in comparison with wild-type LtrB relaxase (Figure 2C). Other mutants have a more subtle phenotype.

(B) Multiple sequence alignment of relaxases. Amino acid sequences of the three most conserved and catalytically important motifs (Motifs I-III) are shown. Amino acid sequences of relaxases were obtained from NCBI GenBank Protein Database (<http://www.ncbi.nlm.nih.gov/protein>); the accession number for each sequence is indicated in square brackets. The conserved amino acids are shown with different background shading within alignment; the invariable amino acids are white on black background. The sequence logo for each motif shown at the top was built using WebLogo [49]. The putative catalytic tyrosine is highlighted in blue, it corresponds to Y21 in LtrB relaxase from pRS01 conjugative plasmid (GenBank:U50902).

**Figure S2.** Donor plasmid copy number and mapping of retrotransposition events.

(A) Copy number of donor plasmid. We estimated the relative copy number of donor plasmid pLNRK-RIG among strains after using standard protocols for DNA-DNA hybridization of DNA isolated as described in Materials and Methods. The 5'-labeled [<sup>32</sup>P]-ATP-oligonucleotide primer (MB14td 5'-TGTCACCATGCAGAGCAGAC-3') complementary to the group I intron in RIG of pLNRK-RIG was used to detect the donor plasmid.

(B) Retrotransposition events into pLNRK-RIG. We performed mapping of the reads using pLNRK-RIG as a reference sequence with Bowtie software under custom settings [43] (see Materials and Methods). The most prevalent sequence fragment generated from the D-C library appeared to be the 3' region flanking the LI.LtrB intron derived from the pLNRK-RIG vector itself (position 5782; shown by grey arrow) indicating the high level of the background amplification. The distribution of the RTP events in the pLNRK-RIG plasmid varied between libraries but supports the previous observation concerning cold-spots for intron invasion in the

essential replication region of *repD*, *repE*, and pAM $\beta$  *ori* [22]. Hot-spots for RTP events were scattered throughout the intron sequence but not in the RIG cassette (*kan*<sup>R</sup> and group I intron).

**Figure S3.** Purification of LtrB relaxase and its activity with dsDNA targets.

(A) LtrB-HIS6 protein purification (see Materials and Methods). Abbreviations: M, marker; incl. bodies, inclusion bodies; FT, flow through; W, wash.

(B) DNA target fragment. The pRS01 *oriT* (96 bp fragment; dark blue) from the conjugative element was cloned into pGEM-T vector (Promega) to create pONoriT1. High quality primarily supercoiled plasmid was isolated from fresh *E. coli* DH5 $\alpha$  overnight culture and was used for relaxase activity assays.

(C) LtrB relaxase from pRS01 cannot nick its cognate *oriT* in dsDNA. Plasmid pONoriT1 (dsDNA) was incubated with 20 ng of either LtrB-HIS6 (Lane 1) or LtrB(Y21A)-HIS6 (Lane 2) or left untreated (Lane 3) for 1 h at 37°C in reaction (50  $\mu$ l) containing relaxase reaction buffer (50 mM Tris-HCl pH 7.9, 100 mM NaCl, 10 mM MgCl<sub>2</sub>, 1mM dithiothreitol) and 100  $\mu$ g/ml bovine serum albumin (BSA). Half of the reaction mixture was treated with 0.5  $\mu$ l of proteinase K (NEB) for an additional 30 min at 37°C. Untreated and treated samples were analyzed on a 0.7% agarose gel after staining with ethidium bromide. Supercoiled plasmid, nicked circles and plasmid-relaxase complexes are shown.

**Figure S4.** Mapping of off-target relaxase cleavage.

(A) Cloning of the *glnP* locus for ssDNA preparation. The genomic *glnP* locus was chosen for further tests of LtrB relaxase activity on non-cognate substrate. Plasmid pONLL*glnP*-R was constructed for ssDNA preparation. pONLL*glnP*-R carried the fragment in direct orientation relative to the phage f1 *ori*.

(B) Schematic representation of the cloned fragment of *glnP* gene and mapping strategy. The positions of cloned fragment (grey box) and six intron insertion sites (blue arrows) are shown. The positions of primers used in the primer extension reactions are shown on the top by black arrows with oligonucleotide number. Cleavages (designated as 1 and 2) were observed within the cloned fragment and the location of the cleavage sites was established (vertical arrows).

(C) LtrB relaxase has off-target activity. Primer extension products were analyzed on denaturing PAGE gels. Some subtle additional bands were observed in several reactions (black spheres, and

boxed on gel) with LtrB-HIS6-treated samples (Lane 1), but not LtrB(Y21A)-HIS6-treated DNA (Lane 2) or the negative control (Lane 3). Results are shown for pON*LLglnP*-R. The position of the cleavage is shown schematically at the top of each gel, and the primer used in the reaction is indicated at the bottom of the gel.

# Supplementary Figures

**A**

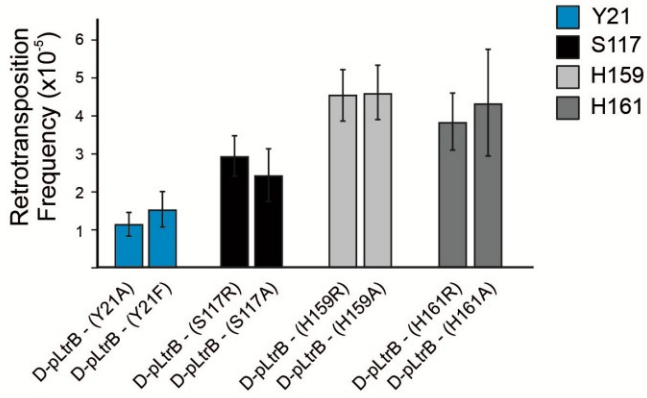

**B**

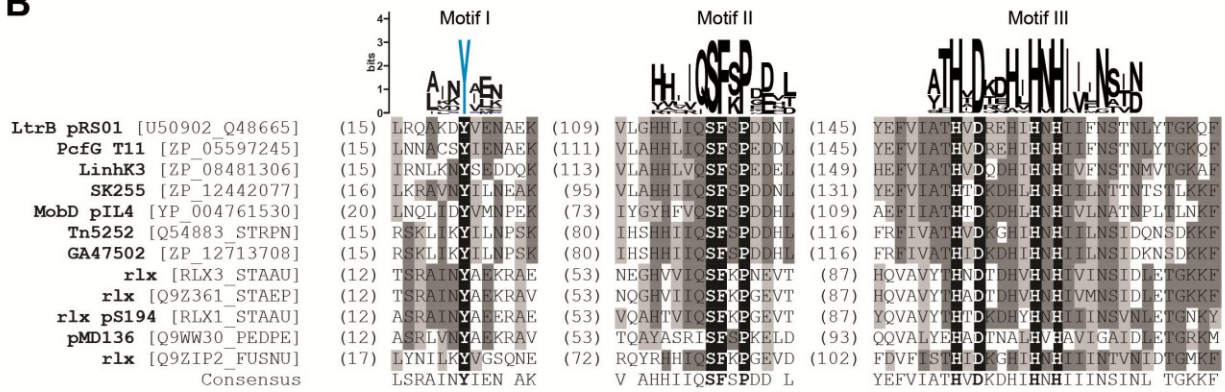

**Figure S1. Effect of relaxase mutations on retrotransposition**

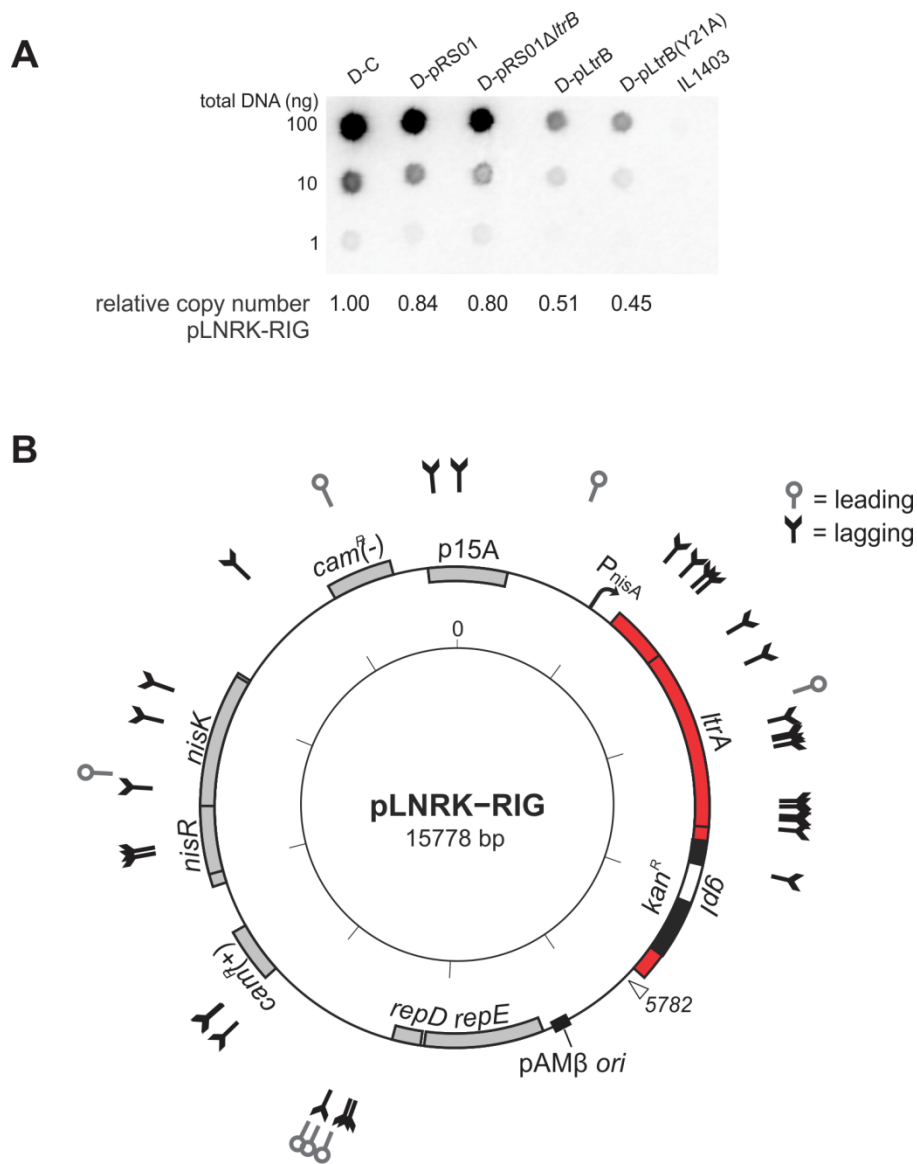

**Figure S2.** The relative copy number of donor plasmid between strains and mapping of the retrotransposition events onto the donor plasmid

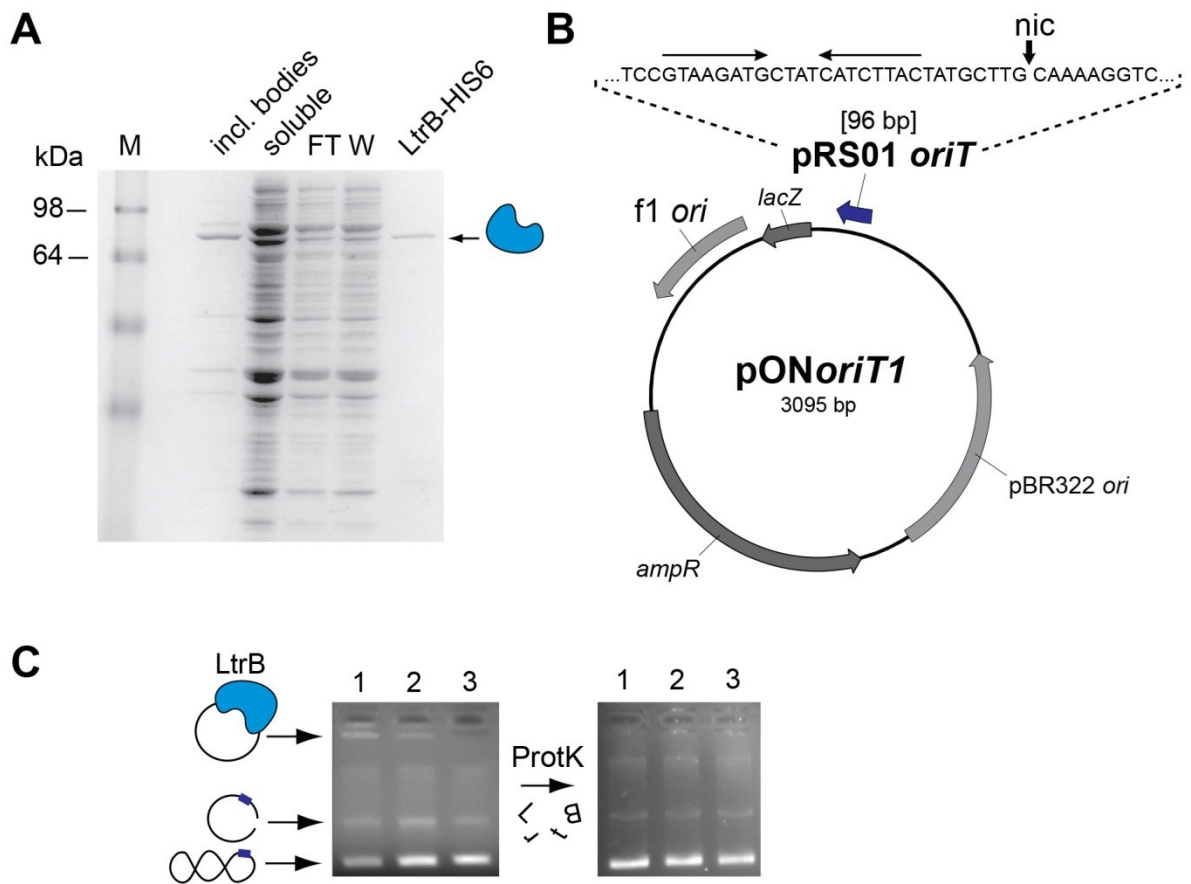

**Figure S3.** Purification of LtrB relaxase and its effect on dsDNA target

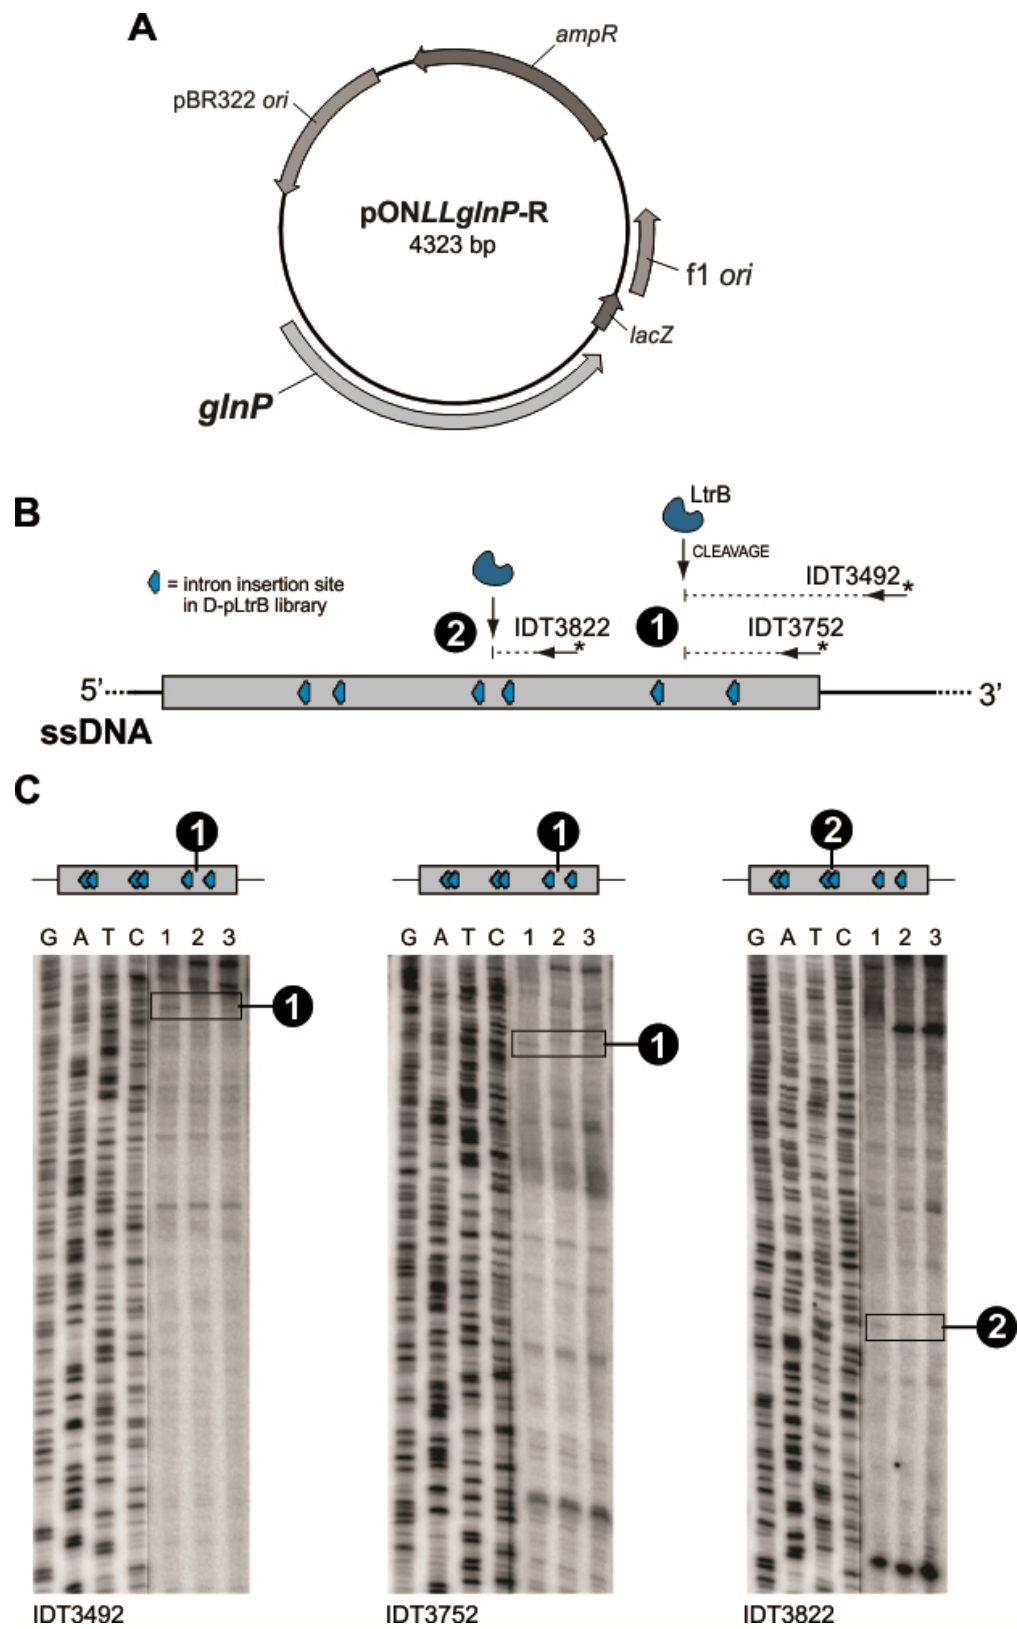

**Figure S4.** Mapping of off-target relaxase cleavage





**Table S2.** Multiple alignment of the chromosomal insertion sites of LI.LtrB intron in the absence of the relaxase (D-C strain). Names of the genes and relative frequencies are given in which insertions of LI.LtrB were detected; the orientation of the insertions relative to the direction of the replication (leading strand, lead; lagging strand, lag) and transcription (sense, S; antisense, AS) as well as genomic coordinates are indicated on the right. The sequence of the homing site and location of the insertion are shown on the top. T+5 is highlighted in red.

| homing_site         | insertion                  |               |      |                 |      |    |         |         |
|---------------------|----------------------------|---------------|------|-----------------|------|----|---------|---------|
|                     | IBS2                       | IBS1          |      |                 |      |    |         |         |
| citE (104.7E-3)     | CGTCGATCGTGAACACATCCATAAC  | CATA          | CATT | TTTTAATCTA      | lead | AS | 1208563 | 1208578 |
| malG (90.6E-3)      | CAGGATAAGACTTGGTTTTCATGTC  | CACCGGG       | TAC  | CCCTAACCA       | lag  | AS | 1742504 | 1742519 |
| yafC (63.5E-3)      | CATTGACGTAACAATTTTCGATAAC  | TATCAATAAGAA  | TG   | AAATA           | lead | AS | 55665   | 55680   |
| citF (57.5E-3)      | ACAACTTCAGCCTCATTAACATAAC  | CATG          | TC   | GGACCACTAAA     | lead | AS | 1209659 | 1209674 |
| ywfG (49.4E-3)      | GATFACCGACCCGATCAATCTRAAC  | CACC          | TAC  | CGACTGGCGT      | lead | AS | 2258691 | 2258706 |
| ysjA (48.7E-3)      | TCCTGCAATCGTATTTCCTTGT     | CATCCACA      | TAAT | TGCAAT          | lag  | S  | 1890475 | 1890490 |
| arcA (37.0E-3)      | AACTCGCAATTTATGCCACTTCAC   | GCTCACTCTAAT  | TC   | CGCGAT          | lag  | S  | 2115042 | 2115057 |
| pi134 (36.8E-3)     | ACCCATACCAATAGCCACTTCAC    | ACGTGACCCACA  | GC   | CTTCA           | lag  | S  | 464964  | 464979  |
| ytiA (36.3E-3)      | AAATGATATGCTCACAACATAAC    | TTAT          | T    | AATTAATAGAGGT   | lag  | S  | 1986494 | 1986509 |
| ybeH (17.4E-3)      | TTTAGAGAAAACCTCTATGCCCTAC  | CATG          | AT   | TATGCTGGAAAT    | lag  | AS | 143096  | 143111  |
| ydiA (16.6E-3)      | GATGATATACCTTCGGTCAATAAT   | CATA          | AA   | AAGCTCAAGCA     | lag  | S  | 381887  | 381902  |
| llrB (15.3E-3)      | GAGAAGTCTATGATGTTTCAAAAT   | TCATATCATATTT | T    | AAAAAG          | lag  | AS | 1458230 | 1458245 |
| yljJ (14.0E-3)      | TCGATACAATATTACTTCTTAAAT   | CAT           | T    | GGCAAATAATA     | lead | AS | 1200004 | 1200019 |
| xynB (13.3E-3)      | AAAGTTTATCTCTAAAGCTCTT     | AAAG          | T    | TATGACAGCTCA    | lag  | S  | 1544533 | 1544548 |
| purA (13.1E-3)      | ATGGACAGCCCTATAGTCTAAT     | GCCT          | T    | GGCTTACCCCT     | lead | AS | 2029172 | 2029187 |
| malG (12.7E-3)      | GTTCCATATCAGTTCCTACTTCAC   | GCCT          | T    | GGCTTACCCCT     | lag  | AS | 1742154 | 1742169 |
| repB (11.4E-3)      | AACACGTAGAAACCTATCCAGAC    | CACC          | AC   | ATAGACCAGTGC    | lead | AS | 1592521 | 1592536 |
| ysdA (10.0E-3)      | ATTCACAGCAGTCAACAATCAAAAT  | CGTA          | T    | AGAAAGGCGG      | lead | AS | 4716    | 4731    |
| ydpA (9.5E-3)       | ATTTCCGATTTTTCAATCTGCTAA   | TAA           | AT   | TAACAAACTCC     | lead | AS | 1834288 | 1834303 |
| intergenic (9.5E-3) | GTCGATGATCCGACATACCTGAT    | CAT           | CA   | ATGAAATTAAT     | lag  | AS | 1530265 | 1530280 |
| oppA (9.4E-3)       | CGCTTAGATTTGCTAAATCGTCAAT  | CATGGG        | AC   | CACTTGGCA       | lag  | .  | 2064332 | 2064347 |
| yxdC (9.3E-3)       | TATCCAAATATAAGTTTTCCTAC    | CA            | AG   | ATACCTTTCA      | lag  | S  | 1906589 | 1906604 |
| ymgK (9.1E-3)       | GTGGCAAATGGTCTCTTCTTAC     | CAC           | AG   | TCAATTAATAT     | lag  | AS | 2335310 | 2335325 |
| ybhB (8.9E-3)       | TTCCGATAATGGCTTTTCTGCG     | CATA          | T    | TCTACCGTAA      | lag  | AS | 1268130 | 1268145 |
| intergenic (8.9E-3) | GCCTCTCAACTGCTCTTGGCTAT    | CATA          | AT   | TAGTATGCTAAC    | lead | AS | 173543  | 173558  |
| murC (8.2E-3)       | ACATTTAATAAACATGCGCCAC     | CA            | AT   | ATGGAAATGAGTGC  | lead | .  | 1880376 | 1880391 |
| ycjH (8.1E-3)       | GGCTGATTAAGCACAATTTTCAATTT | CAT           | T    | AGGACGATTTAT    | lead | AS | 2118446 | 2118461 |
| intergenic (7.5E-3) | GTAATTTCAACAATGGTCACTTCAC  | GTCC          | G    | ACCGTAAATG      | lag  | AS | 295716  | 295731  |
| yudI (7.4E-3)       | CCTAAATAATGCCGCTTCTCCAG    | CA            | AT   | TAACTAAATAG     | lead | .  | 1891667 | 1891682 |
| ykjI (7.2E-3)       | CTTGTATCTACGCTATTTGAAATA   | CA            | AA   | CTTCCACAA       | lag  | AS | 2036117 | 2036132 |
| ykpA (7.2E-3)       | GCTTCAACAATATCTCACTTCAC    | CCCCAA        | AA   | ATTTGCAATCA     | lead | AS | 1098929 | 1098944 |
| ypcA (7.2E-3)       | GTGACGTCCCTTTTTCATGAT      | TAT           | T    | TCTCAATTAAGTT   | lead | AS | 1521196 | 1521211 |
| ldhX (7.0E-3)       | TCTGATAAAGGTCAAAATCATAAT   | CA            | AA   | CAACTTTGCTACCGG | lead | AS | 1143058 | 1143073 |
| rpsI (7.0E-3)       | ATAAAGATAACCACTCACTTCAC    | GAT           | T    | CTTACCGTAA      | lead | AS | 2346610 | 2346625 |
| celB (6.0E-3)       | TCTGATATAGCTTTCTCACTTCAC   | GTCC          | GT   | TAACTGAT        | lag  | S  | 178859  | 178874  |
| pi242 (6.0E-3)      | GTGACCGCTCCCTTTTTCATGAT    | CAT           | GG   | TAAACACCAATATGT | lead | AS | 1061365 | 1061380 |
| ymeA (5.8E-3)       | GCCCTCGGTTGGCCTACTTCTCCG   | TT            | AA   | AGGCACGATATGT   | lead | S  | 1242476 | 1242491 |
| lcnC (5.3E-3)       | CCCTGACGGTCTTTTATCTCAAC    | T             | AA   | ATGCTCACATTTCAA | lag  | S  | 84331   | 84346   |
| sigX (5.3E-3)       | TTAGCGCTAGTGAAGCACTTCAC    | AA            | AG   | AGCACTTTTAGAGC  | lag  | AS | 2242934 | 2242949 |
| als (5.2E-3)        | GATFAGACGACCCACTGGTCAAAAC  | CAC           | C    | TTCACCTCTT      | lead | AS | 1201917 | 1201932 |
| gltD (5.1E-3)       | ATGCTTAGCAATATTTAGCAAT     | CA            | CA   | TAGCCAAATCAAC   | lag  | S  | 1315536 | 1315551 |
| yehH (5.0E-3)       | TTAGCAGGACTTCGGTTCCTCAAT   | TA            | CA   | ATCAACACAGATTT  | lag  | S  | 279638  | 279653  |
| uvrB (5.0E-3)       | TGAGCCAGCACTAATTTCTGAC     | C             | TA   | ATTTGGGGATA     | lead | AS | 556835  | 556850  |
| yljE (4.9E-3)       | AAAATTCGCAATGGTCACTTCAC    | CT            | AA   | CACTTTCGGCTCAA  | lead | AS | 1194711 | 1194726 |
| yidC (4.8E-3)       | TCGACGGACAACATATTTGGCAAC   | CA            | CT   | TTCCTTCT        | lead | AS | 833054  | 833069  |
| apu (4.6E-3)        | TTTGGAAACGATACATATTCATATT  | CAT           | T    | CTTCAATAGATCT   | lead | AS | 703842  | 703857  |
| L200119 (4.6E-3)    | TATTTTCGATTCCTCGGGTCTTTCG  | CACC          | G    | CAATCTCCTGCTC   | lead | AS | 2340666 | 2340681 |
| yyaL (4.5E-3)       | CAAGCCGGTGTGTTACCACTTCAC   | CACA          | C    | CGCCATTAATGAA   | lead | AS | 11386   | 11401   |
| yrjC (4.5E-3)       | ACGTCAATGATGGCTCACTTCAC    | G             | AT   | TGGCAACAAATTT   | lead | AS | 1787588 | 1787603 |
| cysD (4.2E-3)       | CGAAGCTACGCTCTATTCGAAAT    | GAT           | T    | TAAACCGTAAAC    | lag  | AS | 76567   | 76582   |
| yoaB (4.0E-3)       | TCAGGAAATTAACAATTTGCCCAAT  | CA            | AG   | TTCCGCCCACTCAAC | lead | AS | 1403668 | 1403683 |
| ysaA (4.0E-3)       | TGAATGAGTCAACCCAGCCACGAC   | CA            | AA   | CAAGACAAATCCG   | lead | AS | 1806395 | 1806410 |
| L200143 (3.9E-3)    | CGAAGCTGATTTTTCGCACTTCAC   | T             | CA   | AGGAGGAAGCGGGA  | lead | AS | 542137  | 542152  |
| yfcI (3.8E-3)       | AGCGCTATCCCTTCTCACTTCAC    | TAT           | C    | AGCCCTGCTCCTGG  | lead | S  | 529084  | 529099  |
| mend (3.8E-3)       | TATGCCCTGACGATTTCACTTCAC   | AT            | CT   | ATTTTTCCTGG     | lag  | AS | 737583  | 737598  |
| codY (3.7E-3)       | AAGGGAATGATTTTGCACAGGAC    | CC            | CA   | AAGGGGGAATAGC   | lead | AS | 164615  | 164630  |
| yqgG (3.7E-3)       | GAAGCGATAACATGCTCTTTCAC    | CAT           | CA   | AGGCTTCTTATGAT  | lag  | AS | 1664217 | 1664232 |
| noxD (3.4E-3)       | GAAGGATCAACATGACATCCATGAG  | T             | CT   | GATGATTTCCCAATA | lag  | S  | 2195930 | 2195945 |
| yrjB (3.2E-3)       | GGCGGGTCAAAATCTGCTTAAAT    | CA            | AT   | CTGTAATTTCTTGGG | lag  | S  | 1786760 | 1786775 |
| dnaA (3.0E-3)       | CTGAAGCAGTGTGCTGCTTAAAT    | GATA          | C    | ATGAAATCGGCT    | lead | AS | 1668    | 1683    |
| icaC (2.7E-3)       | TGCTCTCGATCTCTTTTGAACATC   | CA            | AT   | TATTTTCACTTA    | lead | AS | 684217  | 684232  |
| ptnC (2.7E-3)       | GTGAGAAAGCCCTCATCCGTTGC    | CC            | CT   | TGAATTAATCGATA  | lag  | AS | 1763895 | 1763910 |
| gatB (2.5E-3)       | AGGAAGAAATGGCCATATTCAC     | G             | AT   | GACCAAGGTTGAT   | lead | AS | 168782  | 168797  |
| pfl (2.5E-3)        | CFATTCAAATATTCGCCATTCAC    | CT            | TC   | CAACCAATTTGAC   | lag  | S  | 659540  | 659555  |
| hemH (2.4E-3)       | TTCAAATTCCTGCTGATACTTCAC   | ACC           | GG   | TGCTTCAATAT     | lag  | S  | 1608898 | 1608913 |
| yreB (2.4E-3)       | TGCAATTTCTTGAACATTTAAT     | GAT           | T    | AGAAATCAAAATA   | lag  | AS | 1744102 | 1744117 |
|                     | CATTCCTACTTCATTAACGAAAT    | CATA          | T    | TTTTAATTTGCA    | lag  | AS |         |         |

|                       |        |          |        |          |         |          |        |      |        |      |    |         |         |
|-----------------------|--------|----------|--------|----------|---------|----------|--------|------|--------|------|----|---------|---------|
| clpE (2.3E-3)         | ACA    | CGTT     | TAATTT | CTTCAT   | CACGCC  | CAATCAC  | GGG    | CAAT | TTC    | lead | AS | 550771  | 550786  |
| yidC (2.3E-3)         | TTGGAT | GT       | TTTTA  | TGAG     | CATAAT  | CTTTAT   | TTGGC  | CA   | GGGT   | lag  | S  | 833363  | 833378  |
| yedJ (2.1E-3)         | ATATA  | TTCC     | CC     | CAAT     | TATTAAC | CAATGGCA | AAAT   | TAAG | CTGT   | lead | AS | 239415  | 239430  |
| intergenic (2.0E-3)   | TCGT   | CTAGT    | TT     | TTAC     | CACTT   | TTCT     | ATTC   | AAAT | GAAT   | lead | .  | 1299735 | 1299750 |
| yj3C (1.9E-3)         | GAAC   | CTCT     | CC     | CAAT     | CTCC    | TT       | CA     | CC   | CCAGC  | lead | AS | 893748  | 893763  |
| glpD (1.8E-3)         | ACCT   | TGATAG   | CT     | CTAC     | CCCT    | CA       | CC     | CA   | AGAT   | lead | AS | 1270237 | 1270252 |
| mgtA (1.8E-3)         | TG     | CTCAAGCA | TT     | CAATA    | CATCAC  | TACTGT   | TAAAA  | TT   | TCCGAT | lead | AS | 1285837 | 1285852 |
| yx6A (1.8E-3)         | TTGGT  | GTATAAA  | TT     | AAAT     | TAGC    | CA       | TAAT   | GAAG | TTC    | lead | S  | 2348003 | 2348018 |
| glgD (1.6E-3)         | TGAT   | CCAA     | TATGGT | CA       | TGCTCC  | CA       | CCCAAA | TTTT | CCCTCC | lag  | S  | 697924  | 697939  |
| pspA (1.6E-3)         | TC     | AAAGAG   | TACC   | ATTGG    | CCAT    | TAC      | TAT    | CT   | TTT    | lag  | AS | 2304139 | 2304154 |
| pspA (1.6E-3)         | CC     | ATTATA   | ATAATG | CC       | CACTT   | CA       | AGCC   | TGA  | TAA    | lag  | AS | 2304622 | 2304637 |
| intergenic (1.5E-3)   | TAT    | ATAAGT   | CCCTGG | CC       | CACTT   | CA       | TT     | TGGT | TAA    | lead | .  | 133760  | 133760  |
| L200091 (1.5E-3)      | GC     | AGGC     | CA     | TGTTACCA | CT      | CA       | TC     | CG   | CC     | lead | AS | 424310  | 424325  |
| pi234 (1.5E-3)        | TT     | CATCC    | ATAAT  | TTC      | CTCC    | TT       | CA     | TAT  | CA     | lead | AS | 1058576 | 1058591 |
| yr3C (1.5E-3)         | GG     | ATAATCG  | AA     | CCAT     | TAAG    | CAT      | GT     | CA   | CC     | lag  | AS | 1792740 | 1792755 |
| yfbJ (1.4E-3)         | AA     | TA       | CTTA   | ATAAT    | TCC     | CA       | TT     | CA   | ATAA   | lag  | S  | 515575  | 515590  |
| ysgC (1.4E-3)         | AA     | TG       | ATA    | TAGCG    | CC      | CA       | TT     | CA   | CC     | lead | AS | 1870118 | 1870133 |
| intergenic (1.3E-3)   | CG     | AAAT     | CC     | CTTA     | CCG     | CA       | AC     | CG   | CT     | lag  | .  | 235061  | 235076  |
| yedJ (1.3E-3)         | TT     | AGG      | CA     | ATT      | CA      | CA       | TT     | CA   | CA     | lag  | S  | 237900  | 237915  |
| ydiB (1.3E-3)         | TT     | GG       | TAG    | CC       | CTT     | CA       | CTT    | CA   | CA     | lag  | S  | 383788  | 383803  |
| yueS (1.3E-3)         | GT     | TT       | CT     | CT       | CA      | CA       | TT     | CA   | CA     | lag  | S  | 2009589 | 2009604 |
| yhdK (1.3E-3)         | TC     | AG       | TT     | CT       | GA      | TAGG     | CT     | CT   | CA     | lead | AS | 2038474 | 2038489 |
| preA (1.2E-3)         | GC     | AA       | TCCG   | TT       | CA      | TT       | CA     | TT   | CA     | lead | AS | 187014  | 187029  |
| nrdf (1.2E-3)         | TC     | AT       | CG     | AC       | AT      | GG       | CT     | CC   | CA     | lag  | AS | 1001348 | 1001363 |
| intergenic (1.2E-3)   | AAA    | A        | CT     | CT       | TT      | AA       | AT     | T    | CA     | lead | .  | 1677069 | 1677084 |
| L200065 (1.2E-3)      | T      | CA       | AA     | ATAAA    | CC      | T        | CA     | AA   | CT     | lead | AS | 1745995 | 1746010 |
| recO (1.1E-3)         | AT     | AT       | TT     | TT       | TA      | AA       | T      | AG   | CA     | lead | AS | 58059   | 58074   |
| citB (1.1E-3)         | C      | T        | G      | A        | A       | A        | T      | C    | G      | lead | AS | 669535  | 669550  |
| yrjD (1.0E-3)         | TT     | CT       | T      | T        | CA      | CA       | TT     | CA   | CA     | lag  | AS | 1793542 | 1793557 |
| fbaA (1.0E-3)         | TC     | AC       | CT     | CA       | AT      | TG       | AA     | CC   | AA     | lead | AS | 1979895 | 1979910 |
| hpt (996.6E-6)        | AC     | AT       | CT     | AG       | CA      | T        | AT     | T    | CA     | lead | AS | 25358   | 25373   |
| L200159 (988.4E-6)    | TT     | T        | AC     | G        | A       | T        | C      | C    | A      | lead | AS | 2364671 | 2364686 |
| rpoC (980.2E-6)       | GA     | A        | CG     | T        | A       | AG       | T      | T    | T      | lead | AS | 1857655 | 1857670 |
| noxB (963.8E-6)       | AA     | CT       | TT     | A        | T       | C        | T      | G    | G      | lag  | S  | 842595  | 842610  |
| hrcA (951.5E-6)       | AT     | AA       | AT     | CA       | AT      | T        | G      | T    | T      | lead | AS | 977222  | 977237  |
| yx6D (951.5E-6)       | GC     | AG       | CT     | AC       | CT      | T        | G      | T    | C      | lag  | S  | 2319277 | 2319292 |
| rpsH (918.7E-6)       | T      | A        | C      | A        | G       | T        | A      | G    | T      | lead | AS | 2162238 | 2162253 |
| scrK (881.8E-6)       | GC     | GG       | A      | A        | T       | C        | A      | T    | G      | lag  | S  | 1518450 | 1518465 |
| thrA (849.0E-6)       | AC     | TT       | T      | C        | G       | C        | A      | T    | C      | lag  | AS | 747685  | 747700  |
| yfhL (832.6E-6)       | C      | C        | T      | C        | T       | C        | T      | T    | C      | lag  | AS | 579452  | 579467  |
| hemH (803.9E-6)       | A      | C        | T      | C        | A       | T        | T      | C    | A      | lead | AS | 1608810 | 1608825 |
| gidB (791.5E-6)       | C      | T        | C      | C        | A       | A        | A      | T    | G      | lead | S  | 1381124 | 1381139 |
| relA (787.4E-6)       | T      | T        | T      | T        | G       | C        | T      | C    | T      | lead | AS | 108865  | 108880  |
| yabA (779.2E-6)       | TC     | AG       | CG     | AA       | CA      | AG       | CG     | AA   | CA     | lag  | AS | 10402   | 10417   |
| ssbB (754.6E-6)       | GA     | AG       | TT     | C        | CG      | CT       | CC     | A    | T      | lead | AS | 2274356 | 2274371 |
| asnB (746.4E-6)       | GT     | TC       | TA     | CA       | AA      | T        | CG     | CA   | CT     | lead | AS | 356847  | 356862  |
| yeaC (746.4E-6)       | T      | G        | A      | T        | C       | A        | T      | T    | C      | lead | AS | 405707  | 405722  |
| intergenic (746.4E-6) | T      | G        | T      | C        | T       | A        | A      | T    | C      | lead | .  | 1260552 | 1260567 |
| fbaA (742.3E-6)       | ACA    | CA       | AT     | GT       | CC      | AT       | CC     | CA   | CT     | lag  | S  | 1979644 | 1979659 |
| llrG (725.9E-6)       | AT     | TT       | TT     | TC       | CT      | GG       | T      | CA   | CC     | lead | AS | 1805025 | 1805040 |
| yveC (725.9E-6)       | A      | A        | G      | T        | A       | C        | G      | A    | C      | lag  | AS | 2143762 | 2143777 |
| intergenic (701.3E-6) | C      | C        | C      | T        | C       | T        | G      | G    | T      | lag  | .  | 2016727 | 2016742 |
| ps105 (693.1E-6)      | A      | A        | G      | C        | T       | C        | A      | T    | C      | lag  | AS | 37893   | 37908   |
| zitP (680.8E-6)       | A      | G        | A      | G        | T       | T        | A      | A    | T      | lag  | S  | 2182929 | 2182944 |
| ptnC (668.5E-6)       | GA     | AG       | A      | T        | C       | G        | A      | T    | C      | lag  | AS | 1764021 | 1764036 |
| ptsI (643.9E-6)       | G      | T        | A      | G        | A       | T        | C      | A    | T      | lead | AS | 121312  | 121327  |
| yjiB (639.8E-6)       | T      | C        | A      | A        | T       | A        | C      | A    | T      | lag  | S  | 982384  | 982399  |
| purA (635.7E-6)       | G      | C        | T      | T        | G       | T        | A      | A    | G      | lag  | S  | 2029214 | 2029229 |
| ydgC (627.5E-6)       | C      | A        | G      | G        | C       | T        | C      | A    | G      | lead | S  | 362514  | 362529  |
| L200142 (623.4E-6)    | T      | A        | C      | G        | T       | T        | C      | G    | A      | lead | AS | 539039  | 539054  |
| fabD (607.0E-6)       | GC     | AT       | A      | A        | T       | C        | A      | A    | T      | lead | AS | 783367  | 783382  |
| alaS (598.8E-6)       | T      | T        | A      | G        | C       | T        | C      | A    | T      | lead | AS | 1778652 | 1778667 |
| intergenic (594.7E-6) | T      | C        | A      | T        | T       | A        | A      | T    | C      | lag  | .  | 767701  | 767716  |
| yqbK (590.6E-6)       | T      | T        | A      | G        | A       | T        | T      | C    | A      | lag  | S  | 1619709 | 1619724 |
| uppP (582.4E-6)       | A      | A        | G      | G        | T       | A        | A      | T    | C      | lead | AS | 2275479 | 2275494 |
| ymeA (578.3E-6)       | A      | T        | T      | C        | A       | T        | C      | C    | A      | lead | S  | 1242654 | 1242669 |
| def (570.1E-6)        | A      | A        | G      | G        | T       | A        | A      | T    | C      | lag  | AS | 555416  | 555431  |
| asnB (561.9E-6)       | G      | T        | T      | C        | T       | A        | A      | G    | T      | lead | AS | 356922  | 356937  |
| rp1M (553.7E-6)       | AG     | A        | T      | A        | T       | A        | C      | T    | C      | lag  | S  | 2346912 | 2346927 |
| nrdd (549.6E-6)       | TC     | AT       | AG     | TT       | CG      | T        | C      | C    | A      | lead | AS | 271457  | 271472  |
| ilvD (549.6E-6)       | TC     | GA       | T      | G        | C       | T        | C      | A    | T      | lead | AS | 1246083 | 1246098 |
| pi301 (541.4E-6)      | TT     | CT       | CA     | GA       | CA      | CT       | CA     | TT   | CA     | lag  | S  | 1414528 | 1414543 |
| ysjD (541.4E-6)       | TT     | TT       | T      | T        | A       | C        | T      | T    | C      | lag  | AS | 1893720 | 1893735 |
| comFA (537.3E-6)      | TC     | AA       | CT     | TT       | CA      | CC       | AA     | CT   | CA     | lead | S  | 1097125 | 1097140 |
| pstC (529.1E-6)       | TC     | AC       | T      | TC       | G       | A        | C      | T    | T      | lag  | S  | 1773284 | 1773299 |
| rqpA (520.9E-6)       | C      | A        | G      | G        | A       | T        | C      | C    | A      | lead | AS | 202268  | 202283  |
| ybcH (512.7E-6)       | AA     | T        | G      | A        | C       | T        | T      | C    | C      | lag  | S  | 123666  | 123681  |
| intergenic (512.7E-6) | AT     | A        | C      | G        | G       | T        | A      | C    | C      | lead | .  | 1781130 | 1781145 |
| L200142 (508.6E-6)    | C      | T        | T      | C        | G       | G        | T      | A    | C      | lead | AS | 538980  | 538995  |
| gyrA (496.3E-6)       | A      | A        | G      | C        | G       | C        | A      | A    | T      | lag  | S  | 1123616 | 1123631 |
| ycfD (492.2E-6)       | A      | A        | G      | C        | C       | G        | C      | A    | A      | lead | AS | 252972  | 252987  |
| yujG (475.7E-6)       | A      | A        | C      | A        | T       | A        | C      | T    | T      | lead | AS | 2099884 | 2099899 |
| yfjF (471.6E-6)       | C      | T        | T      | C        | A       | G        | T      | A    | C      | lead | S  | 599610  | 599625  |
| ymcd (471.6E-6)       | GT     | AT       | CG     | TT       | AG      | CC       | AT     | CC   | AG     | lead | AS | 1221884 | 1221899 |
| ponA (426.5E-6)       | AA     | T        | C      | A        | T       | A        | C      | T    | C      | lead | AS | 530491  | 530506  |
| leuA (418.3E-6)       | AT     | T        | C      | A        | T       | G        | C      | C    | A      | lag  | S  | 1240133 | 1240148 |
| intergenic (410.1E-6) | T      | C        | A      | A        | A       | T        | C      | C    | C      | lead | .  | 426554  | 426569  |
| clpC (410.1E-6)       | ACA    | CT       | CT     | T        | T       | T        | AG     | C    | T      | lag  | S  | 630146  | 630161  |

**Table S3.** Multiple alignment of the chromosomal insertion sites of LI.LtrB intron in the presence of the relaxase (D-pRS01 strain). Names of the genes and relative frequencies are given in which insertions of LI.LtrB were detected; the orientation of the insertions relative to the direction of the replication (leading strand, lead; lagging strand, lag) and transcription (sense, S; antisense, AS) as well as genomic coordinates are indicated on the right. The sequence of the homing site and location of the insertion are shown on the top. T+5 is highlighted in red.

|                      | insertion                     |          |                   |      |    |         |         |
|----------------------|-------------------------------|----------|-------------------|------|----|---------|---------|
|                      | IBS2                          | IBS1     |                   |      |    |         |         |
| L200140 (43.5E-3)    | CGTCGATCGTGAACACATCCATAAC     | CATA     | CATTTTAAATCTA     | lag  | AS | 126580  | 126595  |
| menB (42.1E-3)       | ACGGATTCGAGTCCGTCATAC         | CACTC    | GGCAGCCAC         | lag  | AS | 734626  | 734641  |
| als (41.8E-3)        | ATGGATCAACAGTATTTACCATTC      | CACTC    | CAATGCTTC         | lag  | AS | 1201917 | 1201932 |
| citE (37.1E-3)       | ATTCGCTCAGCATTATTTACCTAAT     | CAACAT   | TGCCAATAAC        | lead | AS | 1208563 | 1208578 |
| ycpB (34.0E-3)       | AGGATAGACTTGGTTTCATGTCC       | ACCGG    | TACCCATAC         | lag  | AS | 220464  | 220479  |
| arcA (28.6E-3)       | GTGGATAATACATTTTTCGCTAC       | TATCAGT  | TAAATAAAG         | lag  | S  | 2115042 | 2115057 |
| malG (25.1E-3)       | ACCATTACCAATTCGCACTTCAC       | ACGTG    | ACCACACACCTTCA    | lag  | AS | 1742504 | 1742519 |
| clpP (20.4E-3)       | CAATCGATCAATTTTTCGCAAAC       | TATGAATA | AGATTCATATA       | lag  | AS | 672765  | 672780  |
| ycgP (16.5E-3)       | ATGGCAGACCCGACATACACCAAC      | CACCAGG  | TCATACCGTA        | lag  | AS | 263794  | 263809  |
| ydgC (14.3E-3)       | GCCTGATCAATTAAGCTCAACATAAT    | CACCAGC  | AACCGTTGGAAT      | lag  | AS | 362156  | 362171  |
| hrcA (14.2E-3)       | GCATAGAACTAAAGCAACATAAT       | CAT      | TGTAAGGCCAACACA   | lead | AS | 977477  | 977492  |
| purA (13.5E-3)       | TCCTGAGATTTGCTCACTTCATAAT     | CAAG     | CATATTTGCGCC      | lead | AS | 2029172 | 2029187 |
| intergenic (11.4E-3) | GTTCATATTCATGTCTTACTTCAC      | CAAT     | TGATGCTCCACTC     | lag  | AS | 492183  | 492198  |
| yljE (9.9E-3)        | TTGCTTAACTCTTTTCCCAACAC       | TAC      | CGCTTGAATAAGATAT  | lead | AS | 1194711 | 1194726 |
| L200158 (9.6E-3)     | TCGACGGACAACATATTCGCAAC       | CAACCTT  | TCTTGTATTTCT      | lead | AS | 2360508 | 2360523 |
| ponA (9.5E-3)        | CAGCCCTTAACTCTTCTCATATAG      | CTATC    | CAAGCCCTGCTCCTG   | lag  | AS | 529213  | 529228  |
| ypaE (9.3E-3)        | GATTCGCTTATTTGTTGACCAAC       | TATC     | CTTTTAAACAGAGC    | lag  | S  | 1505183 | 1505198 |
| ysfA (9.0E-3)        | CTGGAGCGCTTTGCTATCTCAAC       | CAAT     | TCTTAAATCCCTAA    | lead | AS | 1850611 | 1850626 |
| murC (8.6E-3)        | ACGGACCACTCACTGTTCCATTTAT     | CA       | CCAATCAATCCGCGAGC | lead | AS | 2118446 | 2118461 |
| tgt (7.9E-3)         | GTAAATTCATGATGGTCTTACTTCAC    | GTGC     | TGATCTTCTTGTATTTG | lag  | AS | 155934  | 155949  |
| yveC (7.7E-3)        | GATTCGACCTTAAATCTTCAAAAC      | CAGC     | CTTGAACAAATCC     | lag  | AS | 2143762 | 2143777 |
| ldhX (6.7E-3)        | AAATTCGACCTTCTGTAACAGCAC      | CA       | AAACGTAATCCAGC    | lead | AS | 1143058 | 1143073 |
| yljG (6.5E-3)        | ATAAAGATACCCATCTACTTCAC       | CAAT     | TCTTGAATCAATTC    | lead | AS | 1197156 | 1197171 |
| rps1 (6.4E-3)        | AAGTCTTCAGATTTCTTTCCTAAT      | CAT      | GAGTCTTTTATGCGAT  | lead | AS | 2346620 | 2346635 |
| menF (6.3E-3)        | TGCCTGATCTAGCTTTCTTACTTCAC    | GTCCG    | TAACTTACTACTTCT   | lag  | AS | 738249  | 738264  |
| proC (5.8E-3)        | AACGATAAAGTTTCTTGCCTCAAT      | CAT      | CGCGAAGCAATCCG    | lag  | AS | 1953085 | 1953100 |
| ygdA (5.6E-3)        | TCCTCAATCTGTAACATAAGCCAAAT    | CAT      | CAACAAATTTATTTT   | lead | AS | 632471  | 632486  |
| intergenic (5.5E-3)  | TTAACTAACTCTGTTACTTCAATAC     | CAAT     | TAAAGATTAATAGA    | lag  | AS | 74462   | 74477   |
| yahC (5.5E-3)        | ATAATCTCTCTCTTACTTCAATAC      | CA       | CCCATTTCCGCCAATTC | lead | AS | 962423  | 962438  |
| yjgC (5.4E-3)        | GCAGCCCTCAGCTTCCGCTTCATAAC    | CCG      | TAAATTTCCCTGACT   | lag  | AS | 2036117 | 2036132 |
| yudI (5.3E-3)        | GCAACCAACCTCAATATCTGTAAC      | CGC      | TAAATTTCCCTGACT   | lag  | AS | 1061365 | 1061380 |
| pi242 (5.3E-3)       | GCTTCACCAAGTATCTTACTTCAC      | CCCA     | AAATTTCCCTGACT    | lag  | AS | 1208134 | 1208149 |
| citE (5.3E-3)        | CGCCTTCCGCTTCCACTTACTTCAC     | GT       | TGAAATGGCAGCAATTC | lead | AS | 1458230 | 1458245 |
| llrB (5.2E-3)        | CTCTCAAAAATCCCTGATCCATTAAT    | CAT      | GGCTGGGTTATTCCT   | lag  | AS | 2101484 | 2101499 |
| glk (5.1E-3)         | TCGATACAATAGTACTTCTTAAAT      | CAT      | TGCGAATAATATA     | lag  | AS | 1617701 | 1617716 |
| queA (5.1E-3)        | AAATCTCCAGCAGCAAAACCCAC       | CCCG     | TAAATTTCCCTGACT   | lag  | AS | 1742154 | 1742169 |
| malG (5.0E-3)        | TAAGCCCTCAACCAAGTATCTTACTTCAC | CCCA     | AAATTTCCCTGACT    | lag  | AS | 1208167 | 1208182 |
| citE (4.9E-3)        | ARCACCTAACAACCTTAAATCCACAC    | CA       | CAACGATCAGCCAGTCC | lag  | AS | 1710778 | 1710793 |
| yrbA (4.8E-3)        | CTGCATCTTCCAGTCAACATAAT       | CGAG     | CAAGCCCTCAAAATTC  | lag  | AS | 369301  | 369316  |
| ppiA (4.7E-3)        | TCCTGATAGCTCAAGATTCCTCAAT     | CAT      | TAAATTTCCCTGACT   | lag  | AS | 2306115 | 2306130 |
| pspB (4.6E-3)        | TTGTATTAATTTTATTTCTTCAAT      | CTC      | CAAGCCAGTCAAAAG   | lead | AS | 309995  | 310010  |
| ydaG (4.6E-3)        | CAATGACCTGCTTCTTCTTCTTCAAT    | CAAT     | AACTCAATGATCTA    | lead | AS | 840783  | 840798  |
| noxA (4.3E-3)        | TCATGATTTCTTCCCAATCGCTTC      | CAAT     | TAAATTTCCCTGACT   | lag  | AS | 1728090 | 1728105 |
| rliA (4.3E-3)        | TTAAAGACAAGACATCATCCATAAC     | TAC      | AGAGCTTCTTCAATTC  | lead | AS | 551043  | 551058  |
| clpE (4.2E-3)        | CAAGATTTTCATCATTAACATAAT      | CA       | CAATTCAGTTCCTG    | lag  | AS | 529831  | 529846  |
| ponA (4.2E-3)        | ACAGCATCTAAAGTATTTCTTCAAT     | CAT      | TAAACAAATTTCCNAGA | lead | AS | 2340666 | 2340681 |
| L200119 (4.2E-3)     | ACAGCATCTAAAGTATTTCTTCAAT     | CA       | CAATTCAGTTCCTG    | lag  | AS | 962933  | 962948  |
| yjgC (4.1E-3)        | ACAGCATCTAAAGTATTTCTTCAAT     | CA       | CAATTCAGTTCCTG    | lag  | AS | 364642  | 364657  |
| ydgF (4.0E-3)        | TTGCTCTAATGCAGCAAGCCCAAT      | CA       | CAATTCAGTTCCTG    | lag  | AS | 2101115 | 2101130 |
| glk (4.0E-3)         | TCACTGAAAGCCTTAAATTCGCGCAC    | CA       | CAATTCAGTTCCTG    | lag  | AS | 622901  | 622916  |
| apt (3.9E-3)         | GTAGCCGCAAGTATTTAGCCATTTT     | CA       | CAATTCAGTTCCTG    | lag  | AS | 228492  | 228507  |
| yccJ (3.9E-3)        | TTAAAGCTGCTCCCGTTTCATCAAGTC   | CA       | CAATTCAGTTCCTG    | lag  | AS | 295716  | 295731  |
| ycjH (3.9E-3)        | GTAAAATAATCCAGTTCCTTCAAT      | CA       | CAATTCAGTTCCTG    | lag  | AS | 2271599 | 2271614 |
| gntR (3.8E-3)        | GAATTGAAGCCCTCCGTCACATTC      | CA       | CAATTCAGTTCCTG    | lag  | AS | 1201755 | 1201770 |
| als (3.8E-3)         | CCCTGTGAAAACCAAGCTCCCATCAC    | CA       | CAATTCAGTTCCTG    | lag  | AS | 1195835 | 1195850 |
| yljF (3.7E-3)        | AAAGCCGCAAACTTCCCTCCGGCAC     | CA       | CAATTCAGTTCCTG    | lag  | AS | 2117884 | 2117899 |
| argR (3.7E-3)        | CAATCCGCAACCATCGGCTCCAC       | CA       | CAATTCAGTTCCTG    | lag  | AS | 541048  | 541063  |
| L200143 (3.6E-3)     | ATCACCTGAGCTACTCCGCTCCAC      | CA       | CAATTCAGTTCCTG    | lag  | AS | 552211  | 552226  |
| clpE (3.6E-3)        | TTAGTTCGTCCTCCAGGAGCGCAC      | CA       | CAATTCAGTTCCTG    | lag  | AS | 624031  | 624046  |
| rpoE (3.6E-3)        | ATGTCATCTCTTCTTCAATCATTTAT    | CA       | CAATTCAGTTCCTG    | lag  | AS | 540835  | 540850  |
| L200143 (3.6E-3)     | GCCTACCGGCTCCCTCATCCATCAT     | CA       | CAATTCAGTTCCTG    | lag  | AS | 2349720 | 2349735 |
| rnhA (3.6E-3)        | ACAAAATTCAGTITTTCTTCACTGA     | CA       | CAATTCAGTTCCTG    | lag  | AS | 2093418 | 2093433 |
| typA (3.5E-3)        | ATTCACAACTGCTATTCACCCACAC     | CA       | CAATTCAGTTCCTG    | lag  | AS | 1806395 | 1806410 |
| ysaA (3.5E-3)        | CGACTGTCTATTTCGCTTACTTCAC     | CA       | CAATTCAGTTCCTG    | lag  | AS | 2132319 | 2132334 |
| yvdB (3.5E-3)        | AACCGATCTTTTTCGCTTCACTGCG     | CA       | CAATTCAGTTCCTG    | lag  | AS | 1992330 | 1992345 |
| upp (3.3E-3)         | GATTCACCTGCTTAAATTCCTGAAC     | CA       | CAATTCAGTTCCTG    | lag  | AS | 2316615 | 2316630 |
| yxhC (3.2E-3)        | TCACGATGAACTGCTTTTCTTCTGAT    | CA       | CAATTCAGTTCCTG    | lag  | AS | 1204442 | 1204457 |
| mae (3.2E-3)         | AATCTACGCTGCTGAACATTCGCACT    | CA       | CAATTCAGTTCCTG    | lag  | AS |         |         |

|                     |                             |                        |      |    |         |         |
|---------------------|-----------------------------|------------------------|------|----|---------|---------|
| feoB (3.1E-3)       | GCCCTTCAAATCGATGGTCATAAT    | CTAAGTCTGACTTTCAGG     | lag  | AS | 191636  | 191651  |
| yhfb (3.1E-3)       | TCATATATTATCAAGTCAGTACG     | CATATCAATTTTAAATAA     | lead | AS | 752675  | 752690  |
| uvrB (3.0E-3)       | AAARTTGCCAAATGGTCTACCTGAC   | CTAARACTTGTCCCGGTGAA   | lead | AS | 556835  | 556850  |
| xerD (3.0E-3)       | CAATGAACTCAGGAAATTCCTAAT    | CATGGATGATACATTTGA     | lead | AS | 1310409 | 1310424 |
| intergenic (2.9E-3) | AAATAAAGCCCTGAAATCAGGGC     | CTTTAAGATTTTACATCAAT   | lag  | .  | 672356  | 672371  |
| pflA (2.9E-3)       | TCATCATATTTTGGTACATAAT      | CTACAGTCAAATATGGTTG    | lead | AS | 1880878 | 1880893 |
| yjcC (2.9E-3)       | AAATCGATACTGAACACCTTCTCGGT  | TAATCTCAAGTCTCAAGTCC   | lead | AS | 292573  | 292588  |
| citD (2.9E-3)       | GCTTACCARACTGTTTTTCTCATC    | TGAAATCAAATCTATCGAA    | lead | AS | 1207881 | 1207896 |
| murA1 (2.8E-3)      | GTTCGACGAGCCCTAATATCAAC     | CAACAGGCAAGCCCTACTGT   | lead | AS | 313400  | 313415  |
| pepXP (2.8E-3)      | CCAGGCAACCCGACAGACCCATTTT   | CAAGATTCGAATTTATACCA   | lag  | AS | 2135812 | 2135827 |
| citF (2.8E-3)       | GCACCTTACACTCACGGCTCAAT     | CAACAGGTCCTTTGCTTCCG   | lead | AS | 1209068 | 1209083 |
| ydgF (2.8E-3)       | TATGCCCTAGATATCATTCCTGTC    | TATATGCAAGCAAGCCCAAT   | lag  | AS | 364624  | 364639  |
| ybcB (2.8E-3)       | ATAGCCGAAGTGTATAGGCATTTT    | CATTCCTCCCTTCCAAATA    | lead | AS | 212015  | 212030  |
| ycbB (2.8E-3)       | ATAGCCGAAGTGTATAGGCATTTT    | CATTCCTCCCTTCCAAATA    | lead | AS | 212015  | 212030  |
| yffD (2.7E-3)       | ACCTTCTGCGAAGCCCTCAGCTCATC  | CACTCTGCTCGTTTACCTA    | lead | AS | 555725  | 555740  |
| citR (2.7E-3)       | TTAGATAAATTCACATTTCACTCC    | CCAGCAATCATTTGCACCTT   | lead | S  | 1206297 | 1206312 |
| noxD (2.7E-3)       | AAACTATCTCTTTATTAAGTCTTTC   | CACTCAATCTACCTTTTCAT   | lead | AS | 2194773 | 2194788 |
| yvjA (2.7E-3)       | AAACTATCTCTTTATTAAGTCTTTC   | CACTCAATCTACCTTTTCAT   | lead | AS | 2194773 | 2194788 |
| uvrA (2.6E-3)       | CAATCAACCAACCAACCAACATAAC   | CATCTTTTGGATTCGGTC     | lead | AS | 1887923 | 1887938 |
| yoaB (2.6E-3)       | AAAGTTGTAAGGCCATAGCCCAAC    | CCATTTCCAGGTCGAATTTT   | lead | AS | 1403419 | 1403434 |
| hslO (2.6E-3)       | TCAGCTGTAATTAATCAACTTCAC    | CACTATAGGTTTGTATTAAG   | lag  | AS | 2034682 | 2034697 |
| intergenic (2.6E-3) | CCAGCTAGAGCAAGTTCGCAACATAAC | CTATCAACTTCAGTCCGAAAGC | lag  | .  | 492284  | 492299  |
| yngF (2.6E-3)       | AAATCCCTAARACCAACCAACCAAC   | CAACAGGCGCACCCGGAC     | lag  | AS | 1367812 | 1367827 |
| intergenic (2.6E-3) | CAAAGATAAGCGCATATCTGCT      | CCAGAGTTCAGGCTCGGA     | lag  | .  | 492237  | 492252  |
| yahC (2.6E-3)       | TTTGTCAATACAAATTCAGCGCAAC   | CCATCAAGAAATGATTCAC    | lag  | AS | 73624   | 73639   |
| citE (2.5E-3)       | CTTCGATACCCTTTCACCATGGC     | CCGCAATCTTTTTCGCAAA    | lead | AS | 1208323 | 1208338 |
| ysjA (2.5E-3)       | GCCTGTGAATGACTTTTCCCAAC     | CTAATAATAGTCCGTAACC    | lead | AS | 1891336 | 1891351 |
| mutS (2.5E-3)       | CTGCCCAAGTTCATCAARCAAGC     | CAACTTCTTTTCTCCCT      | lead | AS | 1692844 | 1692859 |
| rgxB (2.5E-3)       | TTGGTGATATTTGTTTTCACATTT    | CAACTTCAATTTGGGCGCT    | lead | AS | 1461344 | 1461359 |
| L200146 (2.4E-3)    | CTCTCCAGCACCAGCCAGCCCTCAC   | CCCTATACAGTCCGTTGTC    | lead | AS | 1982423 | 1982438 |
| citC (2.4E-3)       | ATGGATTAACATTCATGACCACTTC   | CCGATATTTTTTTCGCAAA    | lead | AS | 1207184 | 1207199 |
| yrbB (2.4E-3)       | TCGTGCTAATGCTATTAAGCCCAT    | CCCTAGCAGAAATAGCCGAC   | lead | AS | 1711588 | 1711603 |
| clpE (2.4E-3)       | ACAATTTAAAGCAATTTCTCTGTC    | TCATAGCAGAGATTCAT      | lead | AS | 552319  | 552334  |
| citD (2.4E-3)       | CTACCCCAATCGCTCTGGCCTAAT    | CAACCAATCCAAAGCCCT     | lead | AS | 1207998 | 1208013 |
| citF (2.4E-3)       | TCACATCAAGCAACAGTTCGCAAT    | CCGCTCCGCGCACCAAGGT    | lead | AS | 1210229 | 1210244 |
| ypbD (2.3E-3)       | CACTGCTAAATCAATGCTCAAAAC    | CATATAGGAAAGCAGGCG     | lead | AS | 1514931 | 1514946 |
| yogD (2.3E-3)       | GGTTCGCAATTCGTTTAAATCAAT    | ATTTCTCCCTTCTTCAGC     | lag  | AS | 264608  | 264623  |
| nrdG (2.3E-3)       | AGTGAGCAAGCCAGCCCTTCCATCT   | CAACCAATTTGAGGGTTC     | lead | AS | 272739  | 272754  |
| gidC (2.3E-3)       | CCAGATCCAGCTGATTCATACATAC   | CCCTTACTCCCTGTCATTC    | lead | AS | 1257813 | 1257828 |
| citR (2.3E-3)       | CGACACCTTTTTCATATGCGCTAAC   | CAATATCATTCATTTGACA    | lead | AS | 1209302 | 1209317 |
| pfl (2.2E-3)        | GGCCGCAAGCAAGCAATTCATCAC    | CATCATATCTTTTCAGTTC    | lead | AS | 657523  | 657538  |
| pepDB (2.2E-3)      | CGTAATCAACCAATAATCATAAT     | TGCTATCACCAGCAACGC     | lead | AS | 1600812 | 1600827 |
| yneH (2.2E-3)       | TCAGCAATATCTCTTTTCACAAT     | GAACCTTGGAAATGAGAA     | lead | AS | 1346280 | 1346295 |
| yfcI (2.2E-3)       | AGTGCTGACGATTCATTCGCGAT     | CAATAATGAGATGGAAGT     | lead | S  | 529084  | 529099  |
| potA (2.2E-3)       | GTTCGATGAATGACCATTCGTTT     | TAAATTCACCTCCAGGCTAC   | lead | AS | 1176621 | 1176636 |
| lenc (2.2E-3)       | TTAGCCGCTAGTGAAGCACTTCAC    | ATGCAAGCAATATATAGGC    | lag  | S  | 84331   | 84346   |
| sdaB (2.2E-3)       | CAACGATTTAAATTCAGTTCAGGT    | CATGTTCGAAATCCCTTTT    | lead | AS | 843781  | 843796  |
| yjhd (2.2E-3)       | ATTCGATTAATCAATTTTCATGAC    | CTTTTGAAGCCTTTTTC      | lead | AS | 973074  | 973089  |
| ygdA (2.2E-3)       | GGTAGAATCATGTCCAACATATC     | CATCTGACACTGCTTCT      | lead | AS | 632818  | 632833  |
| intergenic (2.1E-3) | GCAACAATAAAGCCGGCCATCTC     | CCCGATAAAGCAATTTAA     | lag  | .  | 506679  | 506694  |
| yyal (2.1E-3)       | ACGTGATATGCTCATCTCACTCAC    | CAATATTTGGCAAGAAATTT   | lead | AS | 11386   | 11401   |
| hflX (2.1E-3)       | TTGACCAAGCACTTTTTCCTAAT     | TCAGGTTCAGTATGCTGCTT   | lead | AS | 225887  | 225902  |
| citF (2.1E-3)       | GCCGCAAGATGACCGTCCGAAC      | CAACATAACGTTACCGTT     | lead | AS | 1210134 | 1210149 |
| glnQ (2.1E-3)       | TTTTTCATAACGGTAGAAGCTCAC    | CAACCATTTTCAGGCTCAAG   | lag  | AS | 1819568 | 1819583 |
| yoaD (2.1E-3)       | TGTGCTTTAGCCCGAATAATCATC    | CCCATTCGCAATTTGCGATA   | lead | AS | 1406099 | 1406114 |
| ywiA (2.0E-3)       | TCCTCCGCAAAATTCAGCAATCTCC   | CAATATTCCTGCTTATAC     | lead | AS | 2280342 | 2280357 |
| pepO (2.0E-3)       | AACTAATGAAGGAGTATATGCAAT    | CAATTTTTCAAATGGCTTTT   | lag  | AS | 1867511 | 1867526 |
| citC (2.0E-3)       | GTCGCTGAAATGCTTCTTTCATTTT   | CATCAGCTTTTTCGCTC      | lead | AS | 1207623 | 1207638 |
| potB (2.0E-3)       | AAAATGATTCGCTTAAATAGCATGGC  | CAATGGGAGCAATCAAAAG    | lead | AS | 1177014 | 1177029 |
| ylhB (2.0E-3)       | CAATAATAATTTAGCCGGCATAAT    | CATGGGATTCATTTTTCOA    | lead | AS | 1173553 | 1173568 |
| intergenic (2.0E-3) | TAGTAAATAAATAACAGGCTTGCT    | CATATATTCGCAAAATAAT    | lag  | .  | 494197  | 494212  |
| pnpA (2.0E-3)       | AGCGCTCCGCTGACCAATTTCCAC    | GTTCCAGGTCGCCCCAACG    | lead | AS | 1923022 | 1923037 |
| ylhB (1.9E-3)       | TCAGCATGTTCTTTAGGACATAAC    | CAACCCAGCTTCATTACAGG   | lead | AS | 1173752 | 1173767 |
| intergenic (1.9E-3) | TACTGATTAATTCATAAACAATAAC   | TATTTTAAATAAGTAAATA    | lag  | .  | 2316411 | 2316426 |
| yncB (1.9E-3)       | GTAGGAAATCATGATTCCTCACTAT   | CATATACACAGTTCCCCAGC   | lead | AS | 1311522 | 1311537 |
| intergenic (1.9E-3) | TTGCGAATAAACAATCTTCTCCAC    | TTTCAATTCAGCCCATTCG    | lead | .  | 1501790 | 1501805 |
| ytgG (1.9E-3)       | TTAATCATCAATTAATGTAATCCAT   | CATATAATGCTTCTTTAA     | lead | AS | 1969437 | 1969452 |
| tra904E (1.9E-3)    | CCARAGAAAGCCATTTAATCTAAC    | CCGGAATAATCGACCTTTT    | lead | S  | 626963  | 626978  |
| citF (1.9E-3)       | TAAGCCGAATTCAGATAACATCAT    | TACCATAGAGGCAATTTT     | lead | AS | 1209756 | 1209771 |
| yoaB (1.9E-3)       | CTCGTTTACTTTCAGCAAGCCGCAAC  | CACTGATTAATTAATCAAA    | lead | AS | 1405483 | 1405498 |
| ygcI (1.9E-3)       | ACTTGTGAAATGGATTAATCATTTT   | CACTAGCTGGGACGGTTCG    | lag  | AS | 653935  | 653950  |
| pacF (1.8E-3)       | GATCCCTCTAATCATAACTCATTT    | AAATAATTCGCAATATGAAGT  | lead | AS | 677838  | 677853  |
| pepDA (1.8E-3)      | AGACGATGACGCAATATCAATAAC    | CCCTGTCGGGATTCGAAT     | lag  | AS | 249255  | 249270  |
| ydiA (1.8E-3)       | GAGAAGCTATGATGATTTCAAAAT    | TCATATCAATTTTAAACA     | lag  | S  | 381887  | 381902  |
| yrfE (1.8E-3)       | GTTFATACTTTTTCATTCATTTG     | CATATTTAATATCAAGT      | lead | AS | 1760358 | 1760373 |
| potA (1.8E-3)       | CTCAATGCTTCATTTTTCAGCAATC   | CCACCATTCGACAGGCTCA    | lead | AS | 1176465 | 1176480 |
| yahA (1.8E-3)       | AAGAACCAGCTTATTCAAACATTTT   | CAATCATTCATTTTGGTCA    | lag  | AS | 72409   | 72424   |
| glnP (1.8E-3)       | CGGACATTCATGGGAGTTCATTTG    | TAAATCTCCCTTTGTTTC     | lag  | AS | 1817470 | 1817485 |
| ptnC (1.8E-3)       | GAAGATGAGTACATTTCCCAAC      | CAACAGACTTTGGAGGTTC    | lag  | AS | 1764021 | 1764036 |
| malG (1.8E-3)       | TAGATTAAGAAATGAAATACATTCG   | CATCATTCCTTCAATTCCT    | lag  | AS | 1742084 | 1742099 |
| yudI (1.8E-3)       | CCGACGACCTCTGTTTCATCAAT     | CATCGGTTCCGCTTCTCA     | lag  | AS | 2036542 | 2036557 |
| yljG (1.8E-3)       | GCCAAAGATTTTCATTAGCAAAAC    | CAACATCCAAAGATCTTGA    | lead | AS | 1197310 | 1197325 |
| pepQ (1.8E-3)       | TTACCTGAGCCGATGCGCAAAAC     | CAATTCAAACCTTTGCTC     | lag  | AS | 1697596 | 1697611 |
| frdC (1.7E-3)       | ACCAATAAACCCTCAACTGCTGAC    | CATCATGTCGGTGGTGGAGT   | lead | AS | 1138403 | 1138418 |
| pepQ (1.7E-3)       | AAAGACAGTCTTCATATCCGCAAC    | TACTTTCACGAGATATATA    | lag  | AS | 1698129 | 1698144 |
| yqjD (1.7E-3)       | TTGCTCTCAAACTCATTAGCATTAC   | TACTTGTGCGGCAATTTGT    | lead | AS | 1698715 | 1698730 |
| ywcC (1.7E-3)       | GTTGTCAAAGAAATCAGTCCACCTT   | TGAGATTAAGGAGGAAATTT   | lag  | AS | 2229240 | 2229255 |
| clsB (1.7E-3)       | CTTATTAAGCCCTTATTAACAGAC    | CATTTAATAATTCGGAATA    | lead | AS | 1188583 | 1188598 |
| deoB (1.7E-3)       | AAATGCTGACAAAGCATATGTCAC    | GTCCATCAGCCGTTCAAA     | lead | AS | 955858  | 955873  |
| dexA (1.7E-3)       | CTTTCGAAATCTCAACACCATCAC    | CATTAGCAATTCATAAAG     | lead | AS | 1736621 | 1736636 |



|                       |                            |                      |      |    |         |         |
|-----------------------|----------------------------|----------------------|------|----|---------|---------|
| glnP (1.7E-3)         | AAATACTGSACTTCTCCATTGC     | TCCGCAAAATCCAGAG     | lag  | AS | 1817416 | 1817431 |
| ptnC (1.6E-3)         | AGGAAGAAATGGCCATACTCAC     | GTAGCCAAAGGTTGAT     | lag  | AS | 1763895 | 1763910 |
| glnP (1.6E-3)         | CTGACATCATTCCTCAGCAWSTC    | CGCTTGAACAGGCTCAAC   | lag  | AS | 1817828 | 1817843 |
| citG (1.6E-3)         | GATGCTCTCAAAATCAATCATAAAT  | CGCTTTATCAATTTCAAA   | lead | AS | 1210864 | 1210879 |
| maeI (1.6E-3)         | GAAAGCTCTCCATCAGTCAAC      | GGCCACAGTTTTCCGCTC   | lead | AS | 1203656 | 1203671 |
| ycgP (1.6E-3)         | AACTCCCAAAATACCTTCTCAAT    | CACTTTTTCAGCGGTTAAA  | lag  | AS | 264275  | 264290  |
| ybaA (1.5E-3)         | GAGCGCTTTTATTTTAAATCCCG    | CTAATCACTCGTTTTGATGA | lag  | S  | 101429  | 101444  |
| pbuX (1.5E-3)         | GTGTGCAACCTTACCBAACATAAT   | CTACATCCGCTCCCCCAAT  | lead | AS | 1161385 | 1161400 |
| clpP (1.5E-3)         | CGTGATAAAATCATAGCAAGT      | CGCCACGGGCTGATTTGTC  | lag  | AS | 672927  | 672942  |
| rliB (1.5E-3)         | TTTCCTCGTGTCTACTGACAAAC    | CAAGCTCTTCTAATTCAGT  | lag  | AS | 1535352 | 1535367 |
| L200097 (1.5E-3)      | TTTGATAAAAGTCAAACTCTCAC    | CAAGCTGCGCAACGAGTCA  | lead | AS | 542710  | 542725  |
| yoaB (1.5E-3)         | CTTCAGGAATTCGAGCAACCGCAAC  | CGCCAACTGCAAACTGAAT  | lead | AS | 1404904 | 1404919 |
| gatB (1.5E-3)         | CTATTCAAATTTGCGCCACTGAC    | CTTGCACCCAGTTTGAAC   | lead | AS | 168767  | 168782  |
| uvrC (1.5E-3)         | CTTGACCACTCCACCATCCATGCG   | AAACAAATCAGGAGAGCC   | lead | AS | 857972  | 857987  |
| intergenic (1.5E-3)   | TGTTGTAGTTTATTACTTACTCAC   | TTCTATTCTCAATGATTAAT | lead | .  | 1299735 | 1299750 |
| pcaA (1.5E-3)         | TCGTTACCAACCGCAAAACATCTT   | CTTCTGTAAAATCTATTG   | lead | AS | 666290  | 666305  |
| rmaA (1.5E-3)         | CTCTCGTAACCTTCTTTTCAAT     | CAAGCCCTTAAATCTCTCA  | lag  | AS | 749971  | 749986  |
| ybdC (1.4E-3)         | CAGSAGCAAATTTACCCCAATAAT   | CAAGATGAAAATGGCAAG   | lead | AS | 132449  | 132464  |
| ywaH (1.4E-3)         | GTAACTATTACTCTGCTTCAAGT    | CAAAATTAAGTTTCTT     | lag  | AS | 2208331 | 2208346 |
| yahC (1.4E-3)         | TAATCATTTCTCCCTCAATCGCAAC  | TGAAAGATTTTCTCAAG    | lag  | AS | 73866   | 73881   |
| gidC (1.4E-3)         | TTGTACAAGATGCGCAAGCATTTAT  | CTTGGCGAAGTTTCAACAC  | lead | AS | 1257582 | 1257597 |
| malF (1.4E-3)         | TTTCCGATATCTTTTATTGTCCGAT  | TGACGTGCAAGAGGAGCG   | lag  | AS | 1740735 | 1740750 |
| als (1.4E-3)          | CTCCTTGTCTATGACCGTCAACG    | CAATGGCCCTCTCTCA     | lead | AS | 1200572 | 1200587 |
| feoB (1.4E-3)         | CGGACGAAATATCATGGACATCC    | CAAAAGTAAGCAACAGGA   | lag  | AS | 190731  | 190746  |
| rliB (1.4E-3)         | TTTCTTTAAAGTAACTTCTTAAG    | TGATAATACCGGTTGCTT   | lag  | AS | 1535526 | 1535541 |
| pbp1B (1.4E-3)        | TTTCGAAACTTTATCTCCGTAAT    | CAAAATTAATTAAGTATCA  | lead | AS | 392472  | 392487  |
| fabG (1.3E-3)         | TTTCGATTAAGCGACGCAACCAAC   | CGCCAACTCAAGCCCAAC   | lead | AS | 801923  | 801938  |
| yxhB (1.3E-3)         | TTTCTATTAGTTTCTTTGACCTAAT  | CAATGAGCCGACCTTCAAT  | lag  | AS | 2301202 | 2301217 |
| yyvB (1.3E-3)         | ACTCCGGAAGGAGCAATCCGTAC    | CAAAAGCCCGAGGAACA    | lead | AS | 2176801 | 2176816 |
| lrg (1.3E-3)          | TGAATCATAGCTCTTTTCTTCAAT   | CAAAAGCAACCTTAGAAA   | lag  | AS | 380962  | 380977  |
| ynfP (1.3E-3)         | ATGTATCAAACTCTTAAACCAAC    | CAACAAGCCAGGAGGGC    | lag  | AS | 1367821 | 1367836 |
| glpD (1.3E-3)         | ACCTTGATAGCATTTACTCTCTCAC  | GCATAAAACAAGTGGCT    | lead | AS | 1270237 | 1270252 |
| ysgC (1.3E-3)         | AAATGATTAAGCGGCCACTGAC     | GCGCAATGCCCGCGAAT    | lead | AS | 1870118 | 1870133 |
| yscB (1.3E-3)         | AGGAAATATAGTCTCTCATCCATAAC | CAATGGGAGCCCTTACGTA  | lead | AS | 1822184 | 1822199 |
| cysM (1.3E-3)         | GTGTATAAGTAGCGTCTCCATTTAT  | CAGGAGCAATCGCTAACAC  | lag  | AS | 526318  | 526333  |
| intergenic (1.2E-3)   | TTGACCCCACTATCTCTCCATTTTC  | CTAGATTAATAATCAAAA   | lag  | .  | 1765153 | 1765168 |
| yijC (1.2E-3)         | GAACTCTCTCCCTTCTCTCTCAC    | GTACACCAAACTCCACAGC  | lead | AS | 893748  | 893763  |
| ynhD (1.2E-3)         | AGAGACTAATCCAAATATCAAT     | CTCGATTCCTAGTGAACA   | lead | AS | 1376527 | 1376542 |
| intergenic (1.2E-3)   | ATCTATAAATATTTTCTGCAAAAT   | CAATGAGCCCTTTTCAAAAT | lead | .  | 600720  | 600735  |
| cidD (1.2E-3)         | CTGGCCCAATCTGATTTCCACATC   | TGAAAGACCTAAGGCTCC   | lead | AS | 1207824 | 1207839 |
| yudI (1.2E-3)         | ACCACATCAAAAGTTTATCAGGAT   | CAGCAAAAGACCGCAACC   | lag  | AS | 2036249 | 2036264 |
| codY (1.2E-3)         | GAAGCGATAACATGCCCTTCTCAC   | CAATCAAGCTCTTCTAAGAT | lead | AS | 164615  | 164630  |
| hemH (1.2E-3)         | TGCACTATCTTAACTTCTTTTATTT  | CAATAGAAAATGAAAAT    | lag  | S  | 1608898 | 1608913 |
| ynfP (1.2E-3)         | TATTCGAGAGACCTACTTCAATGCG  | CTCCGCAAAAGATTAAGCG  | lag  | AS | 1367256 | 1367271 |
| yuhE (1.2E-3)         | AGTCCCTCAGTATCTATTTCAATGCG | CAGAGTAAGGGGCCCCAA   | lag  | AS | 2073300 | 2073315 |
| yudH (1.1E-3)         | GACGCAAAAATGAAATCTCCCTCTC  | CTAGTAATCAACGGGGCAAT | lag  | AS | 2035630 | 2035645 |
| intergenic (1.1E-3)   | CTCCCGAAGCAAGATTTCTCTTTTC  | CTATTTTGAATGAAATTT   | lead | .  | 1641659 | 1641674 |
| mapA (1.1E-3)         | GTCTCTCTAAATTTTCCGSCATTC   | CTCTGTGCCCATGCCCAAT  | lead | AS | 1731080 | 1731095 |
| pbuX (1.0E-3)         | AAATGACCAAACTTTCCTCCAGCG   | CAATCTGTTGACCTAATAAT | lead | AS | 1160642 | 1160657 |
| maeP (1.0E-3)         | AAATGATAAACTTCTTCCCAAAAC   | CACTCTGTTCAAGTAATCA  | lead | AS | 1205444 | 1205459 |
| menB (1.0E-3)         | TTCAAACGAGAAATTTGGTCTTCAAC | CAACATAACCCACTATCC   | lag  | AS | 734925  | 734940  |
| intergenic (1.0E-3)   | ATGCTTAAAGCGTCAATTTCAACGAC | CAATTTTGAATTAATCAAG  | lead | .  | 618453  | 618468  |
| yrjE (1.0E-3)         | ATGSCCAACCTTCACTTACTGTC    | CAATCTTGCATTTAARAC   | lead | AS | 1794110 | 1794125 |
| menF (1.0E-3)         | TTAATTCGCTGTTTCAACCGTTAC   | TGCTTGGCTTTTCAAGC    | lag  | AS | 738516  | 738531  |
| ycgP (1.0E-3)         | TGTGCTTTTACCTAAGCTTCTTTTC  | CAAGATGAGGAGAAATGA   | lead | AS | 265738  | 265753  |
| ythB (1.0E-3)         | AACTTCCGAAGTACCAAGCAAAAT   | CAGCAACCGCAATTCATTA  | lead | AS | 1974386 | 1974401 |
| pepXP (1.0E-3)        | GCAGCGAGCACATTAATCTTCTCAC  | CTAGAAATGCCACCAGAGA  | lag  | AS | 2135848 | 2135863 |
| yuhI (1.0E-3)         | ATATCAGGAGGCAAGCAATCTGCT   | CAATCTCAAAATTTTGGT   | lag  | AS | 2077617 | 2077632 |
| clpC (1.0E-3)         | AAACGGCAATTTGAGCTTCTGCTC   | CAATCATTTGGCTGAGTGT  | lead | AS | 630372  | 630387  |
| menB (1.0E-3)         | GGAAATTTGCTCTTCCCAACATAAC  | CACTCATTTCCACGTACTTT | lag  | AS | 734934  | 734949  |
| intergenic (997.7E-6) | AGCACATTTTATTCTCTTCAATTTTC | ACAACTGTCATTAATATCAC | lead | .  | 779365  | 779380  |
| ppiA (993.9E-6)       | TCATATCTTTCGAAATTTCCAAAT   | CAAAATTTGTGAATGCTA   | lag  | AS | 368737  | 368752  |
| pstA (988.2E-6)       | ATCTTTTCCACTTTTAAAGCAAT    | CAATAAACCCACTTTGAT   | lead | AS | 1771561 | 1771576 |
| intergenic (985.4E-6) | AGTTGACCAAAATTTGACTTGGCATG | TAATAAATAACTTTTCTC   | lag  | .  | 461287  | 461302  |
| aroH (983.5E-6)       | ATGACTAAAGCAATTTCTATCTCTCT | CAACCCCTTAATATGCTCTC | lead | AS | 1281265 | 1281280 |
| pbp2A (983.5E-6)      | TTAGCTGAAGCTTTCAGCAAAAC    | CAATTAGTAATAGTCCGAG  | lead | AS | 2177528 | 2177543 |
| yfiI (972.1E-6)       | AAAGAGACTCTATTTTCCGCAAC    | TCCCAATCCATCCCATTT   | lead | AS | 587196  | 587211  |
| intergenic (964.5E-6) | AGTGCBAAGACTTCCATTTCTCTT   | CTCCCTTAAATTAATAAT   | lead | .  | 1204656 | 1204671 |
| ykiF (960.7E-6)       | TCTAAATCAAGCCAACTTCCAGAAC  | TCAATAGTTCTTTGATAAA  | lag  | AS | 1087045 | 1087060 |
| ysic (957.0E-6)       | CGATTGATTAAGCAAGTTCATAAAC  | CATGACCTTCTTCTCTTT   | lag  | AS | 1884434 | 1884449 |
| yudI (956.0E-6)       | ATTCGATGTAATTTTGTCCATAGT   | CATAAAGAAATTTATAGCA  | lag  | AS | 2035870 | 2035885 |
| dacA (954.1E-6)       | TTTTCGTTAATTCATAAGCATAAT   | CTGAAATGAGGAATTTAGT  | lag  | AS | 2356058 | 2356073 |
| ysjA (942.7E-6)       | AACTCCCAATTTATGCCACTTCCAC  | GCACACTCAATTTCCGAT   | lag  | S  | 1890475 | 1890490 |
| L200091 (932.3E-6)    | GCAGAGCCAACTGTTACCACTTCCAC | TTCGCCGCCCAACATTA    | lead | AS | 424310  | 424325  |
| ycdI (925.7E-6)       | TTAGAGGCAATTTCCCAACTTCCAC  | AAAGCAAGCTTAGCTCCAAG | lag  | S  | 237900  | 237915  |
| yogG (916.2E-6)       | CTTGATTTGCTCTATAAATCATAAT  | TGTTTACCAATTTAATTT   | lead | AS | 1466341 | 1466356 |
| intergenic (915.3E-6) | TTGCGCAACAGCAAAAGGCTCAAC   | TTTCTCTGCTTGTGTC     | lead | .  | 1815777 | 1815792 |
| Intergenic (901.1E-6) | ATARAATTCATTAATATTAAGCAAT  | CTTTAGGAAAATAAGCTA   | lead | .  | 1516165 | 1516180 |
| pspA (868.8E-6)       | CAATTAATAAATGCACTAATCTCAC  | AGGCTGTAAGAGCTCCGAT  | lag  | AS | 2304622 | 2304637 |
| ponA (867.9E-6)       | TAAGCTCCAGCCATTTTTCAGAAC   | TTGCTCCACCAATTTTAA   | lag  | AS | 529759  | 529774  |
| ycgE (844.2E-6)       | CTGAACTATGTTCCACCCACATAAT  | CAATGGAAACCCACTTGA   | lag  | AS | 265242  | 265257  |
| nrdR (837.6E-6)       | TCATCCACATGCTTCCACTTCCAC   | CAAGAAGGTAATCAATACC  | lag  | AS | 1001348 | 1001363 |
| citC (837.6E-6)       | GCGTAAATGSAATTAGCAATCAWAG  | CACTGCCGCGATTTTCTC   | lead | AS | 1207190 | 1207205 |
| ykhD (830.0E-6)       | AGCACTTTCGTTTCAATAGCCATAC  | CACTTGGCCCTAATTTGCC  | lag  | AS | 1072513 | 1072528 |
| pheS (821.5E-6)       | CTTCTTCTTCCAGCATACTTCTCAC  | CAATGCAAGCTCGGCAAA   | lag  | S  | 2009589 | 2009604 |
| intergenic (817.7E-6) | TCGCTTAGTCTGTAGTCTTCCATAG  | CAGCAGAAAGGCTGATA    | lag  | .  | 2281324 | 2281339 |
| yxhD (811.0E-6)       | GCAGCTCACGTTGTCCTTCTTCCAC  | GTCCTGGTGAAGGAAATGG  | lag  | S  | 2319277 | 2319292 |
| mscL (809.2E-6)       | CCAAACGGTAAAGTCAATAGCTTCC  | CACTTAATAAATCAATTT   | lag  | AS | 2170604 | 2170619 |
| yhcA (803.5E-6)       | GTTCGCTCAACTTTTGTAGCTTAT   | CAACCTTTTCAATTTTGA   | lag  | AS | 720821  | 720836  |
| L200142 (781.7E-6)    | TTTACCATCCCAAACTTCTCTCAC   | TCAAGCGGGTTCCTCGGT   | lead | AS | 537959  | 537974  |

|                       |                            |                       |      |    |         |         |
|-----------------------|----------------------------|-----------------------|------|----|---------|---------|
| clpE (771.3E-6)       | GTCAATGACCAGCTTTCATCAAC    | CCACATTCCTCCGGGGGGC   | lead | AS | 551980  | 551995  |
| queA (768.4E-6)       | CCAGCGTTTGAGCAGCAGCAAC     | CATTCCTTTTCCGAAAAC    | lag  | AS | 1617278 | 1617293 |
| yafC (759.9E-6)       | ACAACTGAGCCTATTACCAAC      | CATCTCAGCTGACAAA      | lead | AS | 55665   | 55680   |
| phoC (756.1E-6)       | ACAAAAGTCCCACTATTCATAC     | CATAGGCTTTGATAAATTC   | lead | AS | 1094072 | 1094087 |
| intergenic (735.2E-6) | GGTAACTACCGCAGCAATCTAATC   | CTCTGTGGCCGCAATTTGA   | lag  | .  | 1259597 | 1259612 |
| rIxD (706.8E-6)       | CTTCATATGCGAAATATCATCTC    | ATTCGCTATTCATCGAAC    | lag  | AS | 381092  | 381107  |
| intergenic (701.1E-6) | TAAATAGTCCCTGGCTAATC       | TTTGGTGAAGAATGATC     | lead | .  | 133760  | 133775  |
| intergenic (694.5E-6) | ATCGTAAACAAACCTTACCTTT     | CATCTTACAGTAAADA      | lag  | .  | 172797  | 172812  |
| llrB (688.8E-6)       | GATAAAGGCTCAATTCCTCCGAT    | CATCAGCAATTAATAAT     | lag  | AS | 1458185 | 1458200 |
| tra904C (678.4E-6)    | GAAGATAAAACTGCTCTTCATGAG   | CATAGGGACCGCATGGTG    | lead | S  | 140716  | 140731  |
| intergenic (678.4E-6) | CTTCATAAATTAACATACTCAAC    | TATCTACCAAAATTCAG     | lag  | .  | 565296  | 565311  |
| intergenic (678.4E-6) | TTCTTAACCATTAACAACTAAC     | TCATCAAAATTTCAATTT    | lead | .  | 1718258 | 1718273 |
| trmB (674.6E-6)       | GTGATGAAGCTCTTTTCCACAC     | CCACTCAATTAAGATCGG    | lead | AS | 756416  | 756431  |
| dacA (669.9E-6)       | ACGAGTGAACGATTTTCATTTTC    | CATCAATCAGTAAATTC     | lag  | AS | 2356769 | 2356784 |
| aroK (662.3E-6)       | GTAAATCGGCCACTTTTCATATTC   | CATCTTTCTTTCTTTCAAA   | lead | AS | 1801096 | 1801111 |
| citF (633.9E-6)       | GATACCCAGCCCATCAATCTAAC    | CACCTAATCGACTTGGCTT   | lead | AS | 1209659 | 1209674 |
| pflA (626.3E-6)       | ACGTGCGAACCACATTCATTAAC    | CCGGTCTCAAAATGATG     | lead | AS | 1880728 | 1880743 |
| pnpA (606.4E-6)       | GCTCGTACCCGACCGCTCCGAC     | CAATTCACAGCTCCAGG     | lead | AS | 1923010 | 1923025 |
| pi234 (605.4E-6)      | TTCATCCATAATTTGCTCTCTCAC   | GATTTGAACAFAGGGATCA   | lead | AS | 1058576 | 1058591 |
| reco (604.5E-6)       | ATATTTTATAAAGACCACTCAC     | TGACATCCCGCATAAAGA    | lead | AS | 58059   | 58074   |
| pacL (604.5E-6)       | AAATGAGTTCATCAAGCTTAAAC    | ATCTTATAACGGCTCCAC    | lead | AS | 676631  | 676646  |
| dxs (598.8E-6)        | GTCAATCACCGCTTTGGCATAAC    | CTAGCGTCAAAATGATG     | lead | AS | 1724988 | 1725003 |
| yahI (596.9E-6)       | GCACTAAGTGCCTTTGACATCTC    | CCCAATGATGAAATTAAT    | lag  | AS | 77909   | 77924   |
| yciC (595.0E-6)       | TGGGATTCCTATTCCTCAATGCAAT  | CATATTCACCCATTAATCT   | lead | AS | 285581  | 285596  |
| hom (593.1E-6)        | TCGCCAAAGCCAGCAATTCAGTTT   | CATCAACACCGCAATAATC   | lead | AS | 1171374 | 1171389 |
| rnhA (593.1E-6)       | AAACCGAGATGAGAGTTTCCCAAC   | CTGGCAAAAATGCAATG     | lag  | AS | 2349530 | 2349545 |
| pbp2B (591.2E-6)      | GAAGGCGAAGGACACCTCATTT     | TCGCTGTAAACAATCTTG    | lead | AS | 339692  | 339707  |
| ythB (589.3E-6)       | ACGGTCTCACTCAATTCCTCAAT    | CCCAACAAATGATTAAT     | lead | AS | 1974335 | 1974350 |
| intergenic (573.2E-6) | CCCTCTGGCTCAGTCTCAATCTAC   | GCCGTCAGCCACATATTT    | lag  | .  | 2016727 | 2016742 |
| pfl (567.5E-6)        | TTCAAAATTCCTGATGGATACCTCAC | ACCGGCTGATTTGATTAAT   | lag  | S  | 659540  | 659555  |
| duka (538.2E-6)       | TAAATCGAGCGCTTAATACATTT    | TATTAATCAGACAAAGGCTCT | lag  | AS | 493902  | 493917  |
| rpoC (526.8E-6)       | GAAAGGTAAGTTTGTGATCTCAC    | CCGACCAATTTGATTTCAAC  | lead | AS | 1857655 | 1857670 |
| gidB (520.2E-6)       | CTCGAATTCGACTTACCTCAC      | GGACGAGCTGAGATTTTG    | lead | S  | 1381124 | 1381139 |
| trpD (520.2E-6)       | TCCACCCAGCGATGAAATACCTCAC  | GCCCTCCGACAGCAATCTC   | lag  | S  | 1498901 | 1498916 |
| gntR (519.2E-6)       | CCCGGACTCTTCAAAATTTCAAC    | CATCTCCGATTTGATTTCAAC | lag  | AS | 2272093 | 2272108 |
| intergenic (513.5E-6) | TTCTGATTTAAAGATTAACGCAAT   | TGAGATTAACACTTAATTA   | lead | .  | 1327864 | 1327879 |
| asnB (509.7E-6)       | GTTCGTAACAAATTTGCCAATCAC   | GCGCATTTTCAATCAAT     | lead | AS | 356827  | 356842  |
| glnP (504.1E-6)       | CAATGATTAATCCGACATCAATGC   | TAAGATTAATGAGCAATG    | lag  | AS | 1818448 | 1818463 |
| yseI (493.6E-6)       | AAATGATTTAAGATTTCTTCTTTC   | CATAAAGAACCCCAATCC    | lead | AS | 1849361 | 1849376 |
| hrca (488.0E-6)       | ATAAATGATTTGTTCTTCTACCTCAC | CATCTCCGATTTGATTAAC   | lead | AS | 977222  | 977237  |
| dut (485.1E-6)        | CTTGATTTTCATCACCATCAGCCAC  | CAGAAAGCGCATGAGACT    | lead | AS | 181536  | 181551  |
| noxB (484.2E-6)       | AACTTTATCTCTGGTCAATCTCAC   | GTCAAGGAAATGATCTTG    | lag  | S  | 842595  | 842610  |
| ypgC (483.2E-6)       | ATCTCGAATTAATGTTGTTCTAAC   | CTGAGCTTTCAGTGGAA     | lag  | AS | 1562864 | 1562879 |
| purA (483.2E-6)       | GGTGTGTAAGCTCTAATACCTCAC   | GTGTTGGGAGTGGTCCAT    | lag  | S  | 2029214 | 2029229 |
| preA (482.3E-6)       | GCAATCGCTCTCAATTAATCTCAC   | CAAGCTGAGTAAAGGTAAT   | lead | AS | 187014  | 187029  |
| rpsH (475.6E-6)       | TACAGATTCAGGCAATTAATCTCAC  | CCCAACATTTGTTTCCG     | lead | AS | 2162238 | 2162253 |
| yogY (470.0E-6)       | ACATCCCTCAAGTCTTTTCTCTTC   | CATTAATCTCAATCTCT     | lead | AS | 1468954 | 1468969 |
| busAA (464.3E-6)      | TCTCCTGTAATTAATTTGCGGAT    | CTACACTCTCAACGAAGT    | lead | AS | 1474868 | 1474883 |
| udk (460.5E-6)        | TGTGATCGCGTATGTTTGCATAAT   | CATAAATCGGAATTAAC     | lead | AS | 1709603 | 1709618 |
| dxsB (459.5E-6)       | GCACTCGCGCGACCTATTCACAC    | CATBAGTAATGTTAAATG    | lead | AS | 1724362 | 1724377 |
| yrqI (459.5E-6)       | ATGGAGCGAAAATTTCTCCGAT     | TGATACATTTGCAAAAGCA   | lag  | AS | 1769762 | 1769777 |
| yreB (451.9E-6)       | CTTCCATACTCATTAATGATTT     | CATAATTTTAAATGGA      | lag  | AS | 1744117 | 1744132 |
| citE (447.2E-6)       | CCCTTGAACAAAGCTTCTTCACTCT  | CAACATTCGCAATGAGCT    | lead | AS | 1208681 | 1208696 |
| yudI (442.5E-6)       | AGTGGATGAGTCACTCTTCAAAAT   | CCATCTTTCCAAAGCTCT    | lag  | AS | 2036072 | 2036087 |
| yljF (426.4E-6)       | GTTCGATTCCTCTCAATAGCATAAC  | TAGCTTCAACTGTTCCCAT   | lead | AS | 1196804 | 1196819 |
| yrjD (417.8E-6)       | TCAATTCGAGCAATTCACATCTCAC  | AACCTCAAGGGTGGTGGC    | lag  | S  | 1773284 | 1773299 |
| dnaA (415.0E-6)       | TGCTGTCGATCTCTTTTGAATCAC   | CATCACTTTTCTTCTTTA    | lead | AS | 1668    | 1683    |
| kdgR (410.3E-6)       | TTTTCCTCAGGACCGATTAATCTTC  | TGGAATTTTGCCTGTAAT    | lag  | AS | 1680250 | 1680265 |
| ysfD (409.3E-6)       | GTTCGATTTGAAAGTAAACATTC    | CATCTTTCCAAAGCGGATTT  | lead | AS | 1854261 | 1854276 |
| pknB (408.4E-6)       | TTTCGATGACTGAGTAAACATAAC   | CATCAGCTTTGTTACTCTG   | lead | AS | 1955328 | 1955343 |
| rplM (406.5E-6)       | ACTATATTAACACACATCACTCAC   | CCAGGTGGATTAAGTACAG   | lag  | S  | 2346912 | 2346927 |
| gpsA (405.5E-6)       | TTTCGCCAATAACGACTTCACTCAC  | CATATATCAATTAAGACTTG  | lag  | AS | 1376845 | 1376860 |
| citB (401.7E-6)       | CCGATAATCTGTTGCTAATCTCAC   | TTAATCAACATTAATGCT    | lead | AS | 669535  | 669550  |
| yvdE (400.8E-6)       | AGCCCAAGCACTTTCTTCTTCAAC   | ACTAATTAAGTAAATGGA    | lag  | AS | 2137423 | 2137438 |
| yhfD (398.9E-6)       | TTCCGAAAAAATGATTCGCAAC     | CACCTTTAACAGGGCTCAT   | lead | AS | 755426  | 755441  |
| intergenic (398.9E-6) | ATTCGCAAAATGCTTACCCTATTT   | CATCACTTCAATTAATCT    | lag  | .  | 1002525 | 1002540 |
| pacL (389.4E-6)       | GTAGAGCACTAATAAATCAACAG    | TGATATACAGGTAATGTT    | lead | AS | 678810  | 678825  |
| pspA (389.4E-6)       | GATTAATTTGCGGTTTCAATTAAT   | GGGTCTCCCAATGAGTAA    | lag  | AS | 2303688 | 2303703 |
| uppP (381.8E-6)       | AAGGTAAATCTGCGCAACTCTCAC   | GCCTTACACCAACTAATAA   | lead | AS | 2275479 | 2275494 |
| thra (375.2E-6)       | ACTTTTCGCGCAATCAACTCTCAC   | GGTTCATCAGATTAATTAAT  | lag  | AS | 747685  | 747700  |
| ydiF (369.5E-6)       | CTTCACCTTGCAATCAACTCATAAC  | CCGCTCGGGAAGAAGAA     | lag  | AS | 388917  | 388932  |
| intergenic (369.5E-6) | GATAAGTCTCCCTTTAAGCATAAT   | CTTATGATTTTTTCTTCT    | lead | .  | 1166149 | 1166164 |
| ypjC (355.3E-6)       | ATTCAGGACTGTCACATCTCAAT    | CTTATGATTAATGCGTG     | lead | AS | 1592521 | 1592536 |
| ptnC (353.4E-6)       | ATAAGCTTCAATCAATTCATAAC    | CACGGCAACCAACTCC      | lag  | AS | 1763862 | 1763877 |
| ymjE (348.7E-6)       | CTGTATAGATTTGCAABAGCATAAT  | CACTCAACTTCAAAATTT    | lead | AS | 1297580 | 1297595 |
| nth (345.8E-6)        | CTTCGGCACTAATAATTTGCGCAAT  | CAATAGTTGAAAGGAGTT    | lead | AS | 1083938 | 1083953 |
| llrB (344.9E-6)       | AGCTCTGTCATTTTCATTTCACT    | CATCTCAGCCAGTAAATAT   | lead | AS | 1458407 | 1458422 |
| asnB (341.1E-6)       | GTTCCTAAGTCCCAATCACTCAC    | GGACGCTGAAGTACATC     | lead | AS | 356922  | 356937  |
| ydiF (341.1E-6)       | TTTCATCTCGTGTGTTTCCATTC    | CCCTTTGTTTTTCTGAA     | lag  | AS | 387696  | 387711  |
| intergenic (339.2E-6) | AGAAACTTCTTATTGTCAAAAGGCC  | CTTATGATTTGAAATTTGA   | lag  | .  | 1816604 | 1816619 |
| ydiB (338.3E-6)       | TTTCGTAAGCTGCTTACATCTCAC   | CCGAGGCTTTGAAAGAA     | lag  | S  | 383788  | 383803  |
| ps123 (332.6E-6)      | TTTGTGTAAGCTGCGGCTCTCAC    | CATTTTAAAGATTTGGCC    | lead | AS | 49516   | 49531   |
| ysjD (330.7E-6)       | TTTATTACCTTGTGAGCCACTCAC   | CTGCTCACCAGATRAATC    | lead | AS | 1893720 | 1893735 |
| yrjD (326.9E-6)       | TTTCCTTACCAATTTTCCAATCTCAC | CATTTGCTGAAATTAAC     | lag  | AS | 1793542 | 1793557 |
| fbak (326.9E-6)       | ACACATGTGCCAATCTTACTCTCAC  | GGTGGTTCTGCAATCCCTG   | lag  | S  | 1979644 | 1979659 |
| ptsI (325.0E-6)       | GTAGATGGATCAATTAATCTCAC    | CATCACTCTGCAACAGC     | lead | AS | 121312  | 121327  |
| porA (313.6E-6)       | GACATCGAATCCACTGGCAAAAC    | CCACAGTTTAAAGCAAGC    | lead | AS | 1135794 | 1135809 |
| yudK (312.7E-6)       | TCAGTCTGATAGGCTGCTCAC      | CCCTTAATTTGTTGGCT     | lead | AS | 2038474 | 2038489 |
| citG (307.9E-6)       | ACTCCCAATTTTATCTCAATTT     | CTAACAATCTCAATTTG     | lead | AS | 1211075 | 1211090 |
| intergenic (305.1E-6) | CTCGCTATACTTTTACCTAAC      | CATGACTTTTAGGTAACG    | lead | .  | 1838537 | 1838552 |

|                       |                      |                      |      |    |         |         |
|-----------------------|----------------------|----------------------|------|----|---------|---------|
| yeaC (304.1E-6)       | TGGACATCACTTCACTTAC  | GCACAATCGGTGGTGAAT   | lead | AS | 405707  | 405722  |
| yfbF (304.1E-6)       | AAATAGTCTAATATTCACCT | ATGGGCTAAAGTGCATAA   | lag  | S  | 515575  | 515590  |
| fbaA (304.1E-6)       | TCAACCCCAATTGACCAACT | ATCAACGAGATGCCTTT    | lead | AS | 1979895 | 1979910 |
| psl05 (302.2E-6)      | AAGGGCTTCACTCCTCATOT | ACCCAGCAGATTAAGGC    | lag  | AS | 37893   | 37908   |
| pcrA (297.5E-6)       | GATGATTCGTACGATCCCA  | ACACAGATATTTTGAACA   | lead | AS | 1134512 | 1134527 |
| L200150 (296.6E-6)    | TACGGTACCTTGTACGACT  | CCCTGACCGGTCTACC     | lead | AS | 2221669 | 2221684 |
| intergenic (294.7E-6) | GCAAGTCATAGAGATTTCA  | TCCATTTTCTGTTTGA     | lag  | .  | 2100424 | 2100439 |
| intergenic (291.8E-6) | AAGGATAATATTTTGTGTC  | CTTGCTGSCCTCTCGGAC   | lead | .  | 1401689 | 1401704 |
| recD (290.9E-6)       | TAGGCTTTTCATTTCGCTC  | GCGCCACCCGTTTGGCAA   | lead | AS | 1797401 | 1797416 |
| intergenic (289.9E-6) | TTTCTTAAATTCATATTTCA | CTCTGGATTACTTCAAAA   | lead | .  | 1200392 | 1200407 |
| ypgC (287.1E-6)       | TAGTTTGGCAATGTTTGTG  | CATTAACACTTCCCGAAT   | lag  | AS | 1562527 | 1562542 |
| ptnAB (287.1E-6)      | CTTTATCCACCCGGCAGAG  | CATCATGCTTCTGTAG     | lag  | AS | 1762532 | 1762547 |
| yrgI (287.1E-6)       | GCCCAAAACAGGATTTCA   | CAACATTTCTTCTCTAAA   | lag  | AS | 1769877 | 1769892 |
| yejH (286.1E-6)       | TTATAAAAGTTTACTTCCA  | CACCATAAGAGTATTCAA   | lead | AS | 499252  | 499267  |
| ylad (286.1E-6)       | AGCGGTTTGGAAATCTTTC  | CATGTTCCCGCTTCAAA    | lead | AS | 1105621 | 1105636 |
| scrK (283.3E-6)       | GCGGAATCATTGGTTTACT  | AATGGACAGGAAATGGT    | lag  | S  | 1518450 | 1518465 |
| fhs (279.5E-6)        | ACAGTGAATACAGCAGGCA  | CTCTCAAAACAACACAG    | lead | AS | 960252  | 960267  |
| topA (273.8E-6)       | AAAGCATTAATTTCTTCTC  | CAACAAATAGTTTAAAGC   | lead | AS | 1255147 | 1255162 |
| ymjE (271.9E-6)       | GCAATGCAATTAACAATATA | CAGTGTAAATAATCAAG    | lead | AS | 1296421 | 1296436 |
| comFA (271.0E-6)      | TCAACGTGACACCAAACTC  | TAAATTCGGCAGATCAAA   | lead | S  | 1097125 | 1097140 |
| fabd (269.1E-6)       | GCATAATCAACCCCTCAAC  | CAACAATAACAATTTGTG   | lead | AS | 783367  | 783382  |
| intergenic (268.1E-6) | AAAGTCGGCACTCAATTC   | TATCAATTTTCTGTACA    | lead | .  | 498594  | 498609  |
| ytbB (268.1E-6)       | TCCTGAAATGTTGTAAATC  | CAACAATCTGTTCTTTTC   | lead | AS | 1913605 | 1913620 |
| sdaB (262.5E-6)       | GTGTATCAACTTCTAATAT  | CGCTTTTTCACCCCTAGC   | lead | AS | 843991  | 844006  |
| leus (254.9E-6)       | TCAACATCACTCAGGATTA  | CATGTTTAAAGTATTAGA   | lead | AS | 829278  | 829293  |
| ilvD (252.0E-6)       | TCCATGCTCTCAATCACTC  | CGCTGACCAAAAGATATC   | lead | AS | 1246083 | 1246098 |
| nrdD (251.1E-6)       | TCCATGTTTGGTGTCTACT  | GCTTAAAGCAACGTTTGG   | lead | AS | 271457  | 271472  |
| citD (245.4E-6)       | CAATCGCACGTTCACTAC   | CGCTCTGGCCTTAACTACC  | lead | AS | 1208013 | 1208028 |
| rplC (245.4E-6)       | ACAGTGATTTCTGCTCACT  | CGCCCTCGAGTCCCTTGA   | lead | AS | 2169681 | 2169696 |
| yfjF (236.9E-6)       | CTTCATGACTTACATACCT  | TAGCATGATTTCCGTTGG   | lead | S  | 599610  | 599625  |
| yrfJ (236.9E-6)       | CGATAACCCCTGGCAAACT  | ACCTACTAGCAATTAAGC   | lead | AS | 1794180 | 1794195 |
| clpC (233.1E-6)       | ACAATTGCTTATGCTCTACT | GTAGAAGATGATTTGGTC   | lag  | S  | 630146  | 630161  |
| ymjE (231.2E-6)       | TCCTGCGAATGTTTTACCA  | CATTTTAGAGTTGAARDA   | lead | AS | 1296165 | 1296180 |
| relA (227.4E-6)       | TTTGTCTGCTCTCAACTC   | GACCTCAATTTTCTGTAA   | lead | AS | 108865  | 108880  |
| ssbB (226.4E-6)       | GAACTCCGCTCCATACCTC  | GAGCAATCTACTCTCAAA   | lead | AS | 2274356 | 2274371 |
| yieF (225.5E-6)       | TATTTGACCTCCGACTTCTC | CAATGAGTTTAGGCGTGA   | lead | AS | 486830  | 486845  |
| gyrA (222.7E-6)       | AAGGGCGAAATTTCTCTT   | AACTCGTAAAGGATTTCT   | lag  | S  | 1123631 | 1123646 |
| llrG (222.7E-6)       | ATTTTTCTCTGGTCACCACT | CAATCTCACGAARGAAG    | lead | AS | 1805025 | 1805040 |
| flol (221.7E-6)       | GCTTCGGCCATTCGTACTC  | GTCTTTAGCAGTGGCTTT   | lead | AS | 746840  | 746855  |
| ylad (221.7E-6)       | CCAAATGAACTGCAACTCC  | GATCAACACGGCCCAAA    | lead | AS | 1105720 | 1105735 |
| L200115 (220.8E-6)    | GTCCTCAATCGCCCTACGG  | CGACTCCGACCTCTCTGC   | lead | AS | 2344208 | 2344223 |
| parC (217.0E-6)       | TCAGGTTACATCAAGTACT  | CACCTCTCAATTTGCTCT   | lag  | S  | 1012443 | 1012458 |
| rmaJ (215.1E-6)       | AAATCGGACATGATAGTCA  | TBATATTCCTGTCAGA     | lag  | AS | 583465  | 583480  |
| leuA (211.3E-6)       | ATTCATGTTTCAATGCACT  | CTATTCACATGAATATA    | lag  | S  | 1240133 | 1240148 |
| rpsM (200.9E-6)       | GGTTGATCTAATGCACTCT  | GACGAAGGCTCCCTGGAG   | lead | AS | 2153631 | 2153646 |
| intergenic (199.9E-6) | CAATTTACGAAATGCTTCA  | TATGTTTAAATTAAGGAT   | lag  | .  | 1712489 | 1712504 |
| ponA (199.0E-6)       | AAATCATACTTACCTACTCT | CTAATGCGCCGCGATAT    | lead | S  | 530491  | 530506  |
| yieH (196.1E-6)       | GCACTACTGATGATGCTACT | CAACCAATTTCCCGTGA    | lag  | AS | 850840  | 850855  |
| purI (188.5E-6)       | ATATCCCAACCCGAGCTCC  | CAGCCCCCAACAGACTTG   | lead | AS | 1576156 | 1576171 |
| intergenic (186.7E-6) | AAAACTTCTTTAATAGATT  | TCAATCACTTTTATTTAC   | lead | .  | 1677069 | 1677084 |
| L200065 (185.7E-6)    | TCAAGTAAACCTCAACACT  | TAGCAATTCAGTCTTCT    | lead | AS | 1745995 | 1746010 |
| hemf (184.8E-6)       | AGTCTATTTTGTCTCACTC  | TBAATCTCTHGTAAAGTC   | lead | AS | 1608825 | 1608840 |
| menX (181.9E-6)       | GTCGCCAATTCGGACAGTA  | CAATACATCAATCTAAT    | lag  | AS | 736367  | 736382  |
| hpt (178.1E-6)        | ACATCTAGATTAATTTAORT | CAGAGGATTTGTTCCCGCC  | lead | AS | 25358   | 25373   |
| yqbK (178.1E-6)       | TTAGAGATTATGCCAATAC  | CAAGCACTGGGATTTTAA   | lag  | S  | 1619709 | 1619724 |
| Intergenic (175.3E-6) | AACTCTACACAGAAACATTT | CAAAATTTTATATGAAAA   | lead | .  | 841200  | 841215  |
| ybhC (173.4E-6)       | AAAGATACTTATGTCTACT  | TGGTTTGGAAATATAA     | lead | S  | 123666  | 123681  |
| def (172.4E-6)        | AAGGTTACACTTTGCCACTC | GTAAAGTTGGAAATCTTC   | lag  | AS | 555416  | 555431  |
| L200156 (172.4E-6)    | CTTGGGTTAGCAACTAORT  | GTACTCCAACTCCCGTGG   | lead | AS | 2344471 | 2344486 |
| L200146 (169.6E-6)    | GCAGGGTCAACCCCTTACT  | CTACCGGTTTAGCGAGAG   | lead | AS | 1982437 | 1982452 |
| yyaI (167.7E-6)       | CCAACTATTTCTTTCTTCT  | GCAACTGACCCGGTCCAGC  | lead | AS | 12154   | 12169   |
| pepA (165.8E-6)       | AAGAAACGAAACGTTGTT   | GCAGACACCGCTTCACTC   | lag  | AS | 394211  | 394226  |
| ydbA (163.0E-6)       | ACAATTAARACGTTGCARCT | ATCGAGCCAGCACTCTAC   | lag  | S  | 311295  | 311310  |
| lncC (162.0E-6)       | TTTAAATGCCCTGTTTCTT  | ACAAATCCAAATTAACAAT  | lag  | S  | 83878   | 83893   |
| yfjB (161.1E-6)       | TGTTGAGTCAATCCAGCTC  | CTCCAGTCAACAGGATTC   | lead | AS | 777180  | 777195  |
| sdaA (160.1E-6)       | AGGAATAATTTTAGAATCC  | TBAATCTCTCAATTTTAA   | lead | AS | 844130  | 844145  |
| gyrB (157.3E-6)       | CTGATTTTTCAGTGTCACT  | GCGGACGTTTTCCTGCAAT  | lead | AS | 929120  | 929135  |
| yqcA (155.4E-6)       | TAAACCTCAATGACCGACT  | AACTCCGCTAGTAAATTA   | lag  | S  | 1624880 | 1624895 |
| recF (155.4E-6)       | TCAACCATGATTTTATCCAT | CAGCAATTTGTCCTCAAG   | lag  | AS | 2051618 | 2051633 |
| ydgC (153.5E-6)       | GAGGCTCAGACAGGTACTC  | CTACAGGCTTATTTGGTTA  | lead | S  | 362514  | 362529  |
| pbp2A (153.5E-6)      | GCTGCTCAATCAAGTACTC  | TGTGCGGAACACCAAGTA   | lead | AS | 2178563 | 2178578 |
| dnaE (152.5E-6)       | AACGCTCTAATATCATTTAC | GTCTGCAACAGTAAATTC   | lead | AS | 496795  | 496810  |
| nucA (152.5E-6)       | TATGTAARAATCTAATTTCA | CAATACCAACCTTATAT    | lead | AS | 1100790 | 1100805 |
| intergenic (151.6E-6) | TCAGGAAAGAAATTAORTC  | CATGAGCCCAATAAGAAAT  | lead | .  | 1213718 | 1213733 |
| clpC (147.8E-6)       | GTCAAATGACCCCTCATCAT | CTACATTTCCCGGAGGAGC  | lead | AS | 631593  | 631608  |
| clpB (146.9E-6)       | AGGTGACCTGAAATTAATCT | TTCGCAAGAAACACTGCATC | lag  | S  | 1567554 | 1567569 |
| vacB1 (145.9E-6)      | GAAATATACGCACTTAACT  | CAATCTCTGTTTACCCGA   | lag  | S  | 968723  | 968738  |
| proB (145.0E-6)       | TCAACGAAACGTTCCATCT  | TBAATTTCTGTTTAACTC   | lead | AS | 1652644 | 1652659 |
| pacB (144.0E-6)       | AGCTGGGAAATACAAATG   | CATTAACCTTTTCTGTTG   | lead | AS | 1903831 | 1903846 |
| prsA (141.2E-6)       | AACTTGGCCGACGCTCTACT | CATGGTCAAGGCAAGCAGC  | lead | AS | 826166  | 826181  |
| ymd (141.2E-6)        | CTTCAAGACCTTGGTCAACT | GGAGGAATTTGCCAATACG  | lead | S  | 1238775 | 1238790 |
| ps201 (137.4E-6)      | TATGATTTTAAAGGCTCCAC | CATCTTTCAGCTAATCTG   | lag  | AS | 503656  | 503671  |
| yujG (137.4E-6)       | AACAGTAGAGCAGACTTTCT | CAATCTTCACTTCAGTA    | lead | AS | 2099884 | 2099899 |
| pl301 (136.4E-6)      | TTCTGAGATACATCCACTC  | GAAAGATTTAATGAGTTT   | lag  | S  | 1414528 | 1414543 |
| ddl (134.5E-6)        | AACTCAATCTTCTCACACTC | CTGGAAGCTTCCGGAACAC  | lead | AS | 341407  | 341422  |
| purC (133.6E-6)       | GATGAAATTTCACTCAACTC | GTCCTGCGGATCCGATGG   | lag  | S  | 1577698 | 1577713 |
| yojB (132.6E-6)       | TTTTCAAATTTATGTTACTC | CAATCAATTTTCCGACGC   | lead | AS | 291861  | 291876  |
| glbB (132.6E-6)       | AAGAATCGTTCAGACTCTC  | AGGTACGACACTCAATTT   | lag  | S  | 1318756 | 1318771 |
| ythB (132.6E-6)       | ACATATTTTACCTTCTTCA  | CTTGAATTTACCTTTGTA   | lead | AS | 1974292 | 1974307 |
| yhbB (130.8E-6)       | TAGCCACCCCTGCTCAAGCC | CATATCTGTAAGCGATGT   | lead | AS | 752126  | 752141  |

|                 |                            |                     |      |    |         |         |
|-----------------|----------------------------|---------------------|------|----|---------|---------|
| ptnC (130.8E-6) | CATTGCTCAACCAATACCTTCAAGAC | CAGCAAGGAAGGCACCAAC | lag  | AS | 1763328 | 1763343 |
| potB (127.9E-6) | TCATGCAAGCAACATGGCTACATAC  | TAAATACACAGCAATGGTT | lead | AS | 1177686 | 1177701 |
| y1fD (126.0E-6) | TGCTGTTATAGGCATATGTTCTC    | CATCCTTGCTTCTGAAAT  | lead | AS | 1154773 | 1154788 |
| yrdB (124.1E-6) | GTGACGAGATAGGGTTTCATATT    | CATAAGGGCAACTCCTTC  | lag  | AS | 1748651 | 1748666 |



**Table S4.** Multiple alignment of the chromosomal insertion sites of LI.LtrB intron in the presence of the relaxase (D-pLtrB strain) arranged by the frequency of the event. Names of the genes and relative frequencies are given in which insertions of LI.LtrB were detected; the orientation of the insertions relative to the direction of the replication (leading strand, lead; lagging strand, lag) and transcription (sense, S; antisense, AS) as well as genomic coordinates are indicated on the right. The sequence of the homing site and location of the insertion are shown on the top. T+5 is highlighted in red.

|                     | IBS2                       | IBS1                 | insertion<br>↓       |      |    |         |         |  |
|---------------------|----------------------------|----------------------|----------------------|------|----|---------|---------|--|
| homing_site         | CGTCGATCGTGAACACATCCATAAC  | CATATCATT            | TTTTAATTCTA          |      |    |         |         |  |
| citE (60.5E-3)      | CAGGATAACACTTGGTTTTCATGTC  | CGCGCGGAGGCCATGCA    | CGCGCGGAGGCCATGCA    | lead | AS | 1208563 | 1208578 |  |
| arca (51.2E-3)      | ACCATATACCAATGCGACTTCAC    | ACGTGAGCCACAAAGCTCA  | ACGTGAGCCACAAAGCTCA  | lag  | S  | 2115042 | 2115057 |  |
| L200140 (35.8E-3)   | ACGGATTCGAGTCCGCTGCAATAG   | CACTCTGCCAATGGCTCAC  | CACTCTGCCAATGGCTCAC  | lag  | AS | 126580  | 126595  |  |
| purA (26.5E-3)      | GTTCATATTCGTCTCACTTCAC     | GAATTTGAGTGCCTACTTC  | GAATTTGAGTGCCTACTTC  | lead | AS | 2029172 | 2029187 |  |
| als (25.7E-3)       | ATTCCTTCAGCTATTTTACCAAT    | CAACATAGCCAAATCAAC   | CAACATAGCCAAATCAAC   | lead | AS | 1201917 | 1201932 |  |
| menB (22.9E-3)      | ATGGACCAACAGTATTACCATTC    | CATCTCATTGCTTCCTGC   | CATCTCATTGCTTCCTGC   | lag  | AS | 734626  | 734641  |  |
| ycgP (17.2E-3)      | ACTCAATCATTAACCTCCATTA     | TCACCAGCAACCGTGGAA   | TCACCAGCAACCGTGGAA   | lag  | AS | 263794  | 263809  |  |
| murC (16.9E-3)      | GTAATTCATGATGGTCTACTTCAC   | GTGCCGACCCGTTAATTTG  | GTGCCGACCCGTTAATTTG  | lead | AS | 2118466 | 2118481 |  |
| rpsI (15.3E-3)      | TGTCGGATCAAGCTTTCCTACTTCAC | GTCCGTTAACCTGTGATTT  | GTCCGTTAACCTGTGATTT  | lead | AS | 2346610 | 2346625 |  |
| ycbB (14.8E-3)      | TGTCGGATAATACATTTTTCGTTA   | GTATCAGTCTGATATAAAT  | GTATCAGTCTGATATAAAT  | lag  | AS | 220464  | 220479  |  |
| ldhX (13.5E-3)      | ATAAAGATAATCCAAACCTACTTCAC | GTATTCCTGCAATCAATTC  | GTATTCCTGCAATCAATTC  | lead | AS | 1143058 | 1143073 |  |
| malG (12.4E-3)      | CATTCACCTGATAATTTTTCATAAC  | TATGAATAAGATTCGAATA  | TATGAATAAGATTCGAATA  | lag  | AS | 1742504 | 1742519 |  |
| malG (12.2E-3)      | AACACCTCAAACTATTCCTGAGC    | CACTACCAATAGACCAGTCC | CACTACCAATAGACCAGTCC | lag  | AS | 1742154 | 1742169 |  |
| yudI (12.2E-3)      | GCTTCAACCAAGTATCTACTTCAC   | CCCAAATAATTCGATGGA   | CCCAAATAATTCGATGGA   | lag  | AS | 2036117 | 2036132 |  |
| pi242 (11.5E-3)     | CGGCTTCCGCTTGCACACTTCAC    | GTGAAAGGCAGCATATGG   | GTGAAAGGCAGCATATGG   | lead | AS | 1061365 | 1061380 |  |
| yafC (11.3E-3)      | ACAACTTCAGCCTCATTACCAATC   | CATCTTCGACACCTCAAA   | CATCTTCGACACCTCAAA   | lead | AS | 55665   | 55680   |  |
| L200119 (10.8E-3)   | CAAGCCGGTGTGTTACCACTTCAC   | CACATCGCCCAATGAAA    | CACATCGCCCAATGAAA    | lead | AS | 2340666 | 2340681 |  |
| citC (10.1E-3)      | ATGGATTCACATTCATGACCTCTGC  | CCCGATTTTTCGCAACA    | CCCGATTTTTCGCAACA    | lead | AS | 1207184 | 1207199 |  |
| yvdD (9.9E-3)       | ATTAACCAAACTCATAAAGCCCAAC  | CAATAATCAATCCAAATATG | CAATAATCAATCCAAATATG | lead | AS | 2134373 | 2134388 |  |
| llrB (9.4E-3)       | TCTGATAAATGTTACTTCCTAAT    | CATTTCCCGCAAAATATA   | CATTTCCCGCAAAATATA   | lag  | AS | 1458230 | 1458245 |  |
| clpP (9.4E-3)       | ATGGCCAGACCCGCAATACCAAAC   | CACCAAGTTCCTTACGTA   | CACCAAGTTCCTTACGTA   | lag  | AS | 672765  | 672780  |  |
| citD (9.1E-3)       | CATTCGCAATCGCTTCGGCTTAAT   | CACCAATCCAAAGCCCT    | CACCAATCCAAAGCCCT    | lead | AS | 1207998 | 1208013 |  |
| yljG (8.7E-3)       | AAGTCTTCAGATTCTCTTGGAAAT   | GATGAGTCTTTCAGGCAT   | GATGAGTCTTTCAGGCAT   | lead | AS | 1197156 | 1197171 |  |
| yahG (8.1E-3)       | GCAGCGTAGCTTGGCTTCATAAC    | CACCCATTTCGCCAAATTC  | CACCCATTTCGCCAAATTC  | lag  | AS | 74462   | 74477   |  |
| citC (7.8E-3)       | GTCGCTGAAATGATTTCTCATTTT   | CATCAGCTTTTTCGCTTC   | CATCAGCTTTTTCGCTTC   | lead | AS | 1207623 | 1207638 |  |
| ysaA (7.5E-3)       | GGACTGTCAATTTTTCCTACTTCAC  | TCACAGGAGGAAGCGGGAA  | TCACAGGAGGAAGCGGGAA  | lead | AS | 1806395 | 1806410 |  |
| yxhC (7.3E-3)       | TCACGATGAACTGCTTTTCTCTAT   | CTTCAACCCGCTTCAATTC  | CTTCAACCCGCTTCAATTC  | lag  | AS | 2316615 | 2316630 |  |
| uvrB (6.9E-3)       | AAAATTGCCAATTCGCTCTACTTCAC | GTAAAGGCAATTCGCGTAA  | GTAAAGGCAATTCGCGTAA  | lead | AS | 556835  | 556850  |  |
| yljE (6.4E-3)       | TCGACGGACAACATATTTTCGAAAC  | CAACCTTTCCTTGTCTTCT  | CAACCTTTCCTTGTCTTCT  | lead | AS | 1194711 | 1194726 |  |
| yuhE (6.1E-3)       | AGTTCGCAATTTGCTTTTCTCTAT   | CACTGAGCTTTCGCAAAAGC | CACTGAGCTTTCGCAAAAGC | lag  | AS | 2073393 | 2073408 |  |
| gntR (6.0E-3)       | TGAATGAAAACCTTCGCTCACTAT   | CAATATTCGCAATTAATA   | CAATATTCGCAATTAATA   | lag  | AS | 2271599 | 2271614 |  |
| lcnC (5.9E-3)       | TTAGCCGTATCGAAGCTACTTCAC   | AACGAGCAATTTATAGAGC  | AACGAGCAATTTATAGAGC  | lag  | S  | 84331   | 84346   |  |
| citF (5.7E-3)       | GATTCGCGACCGCATCAATCTAAT   | CACCTTTCATCTTCGCTT   | CACCTTTCATCTTCGCTT   | lead | AS | 1209659 | 1209674 |  |
| citE (5.5E-3)       | CCTCAAAAATTCCTGCATCTTAAT   | CATGGCTGGGTTATTCGCA  | CATGGCTGGGTTATTCGCA  | lead | AS | 1208134 | 1208149 |  |
| queA (5.4E-3)       | GCATCAAACTTTCATCTCAATAC    | CAGGTTTAAAGAAATCTC   | CAGGTTTAAAGAAATCTC   | lag  | AS | 1617614 | 1617629 |  |
| yyaI (5.1E-3)       | ACGTCAATCATGGCATCTACTTCAC  | GAATATTCGCAATTAATA   | GAATATTCGCAATTAATA   | lead | AS | 11386   | 11401   |  |
| citE (5.0E-3)       | CGCGGATTTCCGCGCATCTCATC    | GCCAGCCGAGACTCAAGT   | GCCAGCCGAGACTCAAGT   | lead | AS | 1208482 | 1208497 |  |
| L200150 (5.0E-3)    | TGCTTCAAGCCCGGAAAGCTAAT    | CCCGCGGCTGCTGATCC    | CCCGCGGCTGCTGATCC    | lead | AS | 2221784 | 2221799 |  |
| intergenic (4.5E-3) | TGTTCTAGTATTTTACCTACTTCAC  | TTCTATTCCAAAGATAT    | TTCTATTCCAAAGATAT    | .    |    | 1299735 | 1299750 |  |
| menB (4.0E-3)       | GCGGCAAGTAAACCAAGCCATAAC   | CAAGCATCAAAGCAACAAC  | CAAGCATCAAAGCAACAAC  | lag  | AS | 734727  | 734742  |  |
| ptnC (3.9E-3)       | AGGAAGAAATGCGCCATACTTCAC   | GTAGTACCAAAAGGATGAT  | GTAGTACCAAAAGGATGAT  | lag  | AS | 1763895 | 1763910 |  |
| typA (3.9E-3)       | TTGATGTTCCTCGGAATAACCGTC   | CAATACCAATAGCTCCAAC  | CAATACCAATAGCTCCAAC  | lead | AS | 2093826 | 2093841 |  |
| ywaB (3.9E-3)       | AAAGTCAAATCCAGCCTTCAAT     | CATCTCAATCTTCTCTT    | CATCTCAATCTTCTCTT    | lead | AS | 2201396 | 2201411 |  |
| codY (3.8E-3)       | GAAGCGATAACTGCTCTTCTTCAC   | CATCAAGCTCTTCAATGAT  | CATCAAGCTCTTCAATGAT  | lead | AS | 164615  | 164630  |  |
| plsX (3.8E-3)       | GTGACTCTTGCTTATTTCTCTTAAC  | CAAAAGTAAGCCGGCGT    | CAAAAGTAAGCCGGCGT    | lag  | AS | 71836   | 71851   |  |
| yljJ (3.5E-3)       | TCATACAAAGCCGCGCTTCAAT     | CATTTCCAAAGCTTTATG   | CATTTCCAAAGCTTTATG   | lag  | AS | 1200077 | 1200092 |  |
| ysiC (3.4E-3)       | CGATTGATGACAGTTCGATAAC     | CATGACTTCTGCTTCTT    | CATGACTTCTGCTTCTT    | lag  | AS | 1884434 | 1884449 |  |
| gatB (3.3E-3)       | GTATTCAAATATTCAGCCACTTCAC  | GTGCAACCCAGCTTTGAC   | GTGCAACCCAGCTTTGAC   | lead | AS | 168767  | 168782  |  |
| yijC (3.3E-3)       | GAACTCTTCCCTTCTCTCTTCAC    | GTACACCAAATCCACCAGC  | GTACACCAAATCCACCAGC  | lead | AS | 893748  | 893763  |  |
| acmA (3.3E-3)       | ATTCGATTCAGGGAAGCAACATAAT  | TGGGTCACTTGCATATTC   | TGGGTCACTTGCATATTC   | lag  | AS | 269483  | 269498  |  |
| clpC (3.2E-3)       | GTCAATGACCTCCTCATATAAC     | CTACATCCCGGGAGGAGC   | CTACATCCCGGGAGGAGC   | lead | AS | 631593  | 631608  |  |
| apt (3.2E-3)        | TGCATTAGAATTTTATCTCAAT     | CTCCGATTTTTCCGCGACC  | CTCCGATTTTTCCGCGACC  | lead | AS | 623294  | 623309  |  |
| proc (3.1E-3)       | TCTCTAATGCTGCTTACGCTAAT    | CTACACCAAATCTCAATTT  | CTACACCAAATCTCAATTT  | lag  | AS | 1953085 | 1953100 |  |
| aroc (3.1E-3)       | AGCTTGGCAAAATACACTTCAC     | GAATAGAAATTCGAATAG   | GAATAGAAATTCGAATAG   | lag  | S  | 1810915 | 1810930 |  |
| citD (3.1E-3)       | TAGCTTCAATCGCACCTTCCAATAC  | CGCAATCGCTTGGCCATA   | CGCAATCGCTTGGCCATA   | lead | AS | 1280819 | 1280834 |  |
| ysgC (3.1E-3)       | AATGTATTAAGCCAGCCACTTCAC   | GCGCAATTCGCGCGGAAT   | GCGCAATTCGCGCGGAAT   | lead | AS | 1870118 | 1870133 |  |
| yijC (3.1E-3)       | TTGCTAAACAGCAATTTTCATAAC   | CGTCATCTTCCAGCATCACC | CGTCATCTTCCAGCATCACC | lead | AS | 962933  | 962948  |  |
| citF (3.0E-3)       | GCGCTCAAGATGACCGCTCAAGAC   | CAATCATAACCTTACGCT   | CAATCATAACCTTACGCT   | lead | AS | 1210134 | 1210149 |  |
| ycgE (3.0E-3)       | CTGAACATATGTTCCACCCACATAAT | CATTTGGAAACCTGTTGA   | CATTTGGAAACCTGTTGA   | lag  | AS | 265242  | 265257  |  |
| yvdF (3.0E-3)       | TTATTTCGCGCAATTTGCTCAAGAC  | CACTCGTCAAAGCGCTAA   | CACTCGTCAAAGCGCTAA   | lag  | AS | 2138104 | 2138119 |  |
| als (2.9E-3)        | CCAAATCAACGGCTGCTGAGCGAC   | CATATTTCAATTTCTCTG   | CATATTTCAATTTCTCTG   | lead | AS | 1201884 | 1201899 |  |
| ycjC (2.9E-3)       | AATCGATCTGACACCTTCTCGGT    | CATCTTCAAGTCTCAATTC  | CATCTTCAAGTCTCAATTC  | lead | AS | 292573  | 292588  |  |
| glnQ (2.8E-3)       | TTTTCATACCGCTGAGAACCTAC    | CAACCATTTGAGGCTCRAAG | CAACCATTTGAGGCTCRAAG | lag  | AS | 1819568 | 1819583 |  |
| feoB (2.7E-3)       | CGGACAATAATCATGGACATTC     | CAAAAGTAAGCAAGGAA    | CAAAAGTAAGCAAGGAA    | lag  | AS | 190731  | 190746  |  |



|                       |                            |                        |      |    |         |         |
|-----------------------|----------------------------|------------------------|------|----|---------|---------|
| yhcA (1.4E-3)         | GTGACGCAATCGCTCTTCATGAC    | GCTTTATCAGATAAGCT      | lag  | AS | 721505  | 721520  |
| ptnC (1.3E-3)         | GAAGATGAGTCCATTTCCAGAAC    | CAACAGAGCTTGGAGGCT     | lag  | AS | 1764021 | 1764036 |
| glnP (1.3E-3)         | GGGACATTCATGGGAGTTCATTCG   | TAAATCTGGCCCTTGTTTC    | lag  | AS | 1817470 | 1817485 |
| noxB (1.3E-3)         | AACTTTATCCGTGGTCAATCTTCAC  | GTCGAGGAAATGTCCTTTC    | lag  | S  | 842595  | 842610  |
| trpD (1.3E-3)         | TCCACCCACCGTTCATATCACTTCAC | GCCGTCCCGCAGCAACCTC    | lag  | S  | 1498901 | 1498916 |
| noxB (1.3E-3)         | GTCGCAATGCTACTGCAACACCCAC  | CAACCGATGACACCAATTCG   | lead | AS | 841329  | 841344  |
| intergenic (1.3E-3)   | CCCTCTGGCTCCGCTGCACTTCAC   | GCCGCACTGCACATATTTT    | lag  | .  | 2016727 | 2016742 |
| yqiA (1.3E-3)         | ACCGCGCTCAAGCCGGCACCCATTC  | GCACACAAAAGAAAGAC      | lead | AS | 1681716 | 1681731 |
| murA1 (1.3E-3)        | GTTCCGACGAGCCCTAATCAACCCG  | CAACGAGCAAGCCCTACTGT   | lead | AS | 313400  | 313415  |
| fhuR (1.3E-3)         | CTTCTCCAACTCTTTAACCAGAT    | CGCATTTGAGGGTTCAGTA    | lead | AS | 330533  | 330548  |
| asnB (1.3E-3)         | GTTCCGTAACAAATTCGCCACTTCAC | GGCATATTTTCAATCAAT     | lead | AS | 356847  | 356862  |
| rpoC (1.3E-3)         | GAAACGAAAGTTTTTTGACTTCAC   | CGAGCACTCAAGTTTCAAC    | lead | AS | 1857655 | 1857670 |
| menD (1.3E-3)         | CAAGAACTTGAGCATCCACCCCTTC  | CAAACTTTTTTTCTACTCT    | lag  | AS | 736927  | 736942  |
| pstC (1.3E-3)         | TCAGTTTCGAGCAATTCACACTTCAC | AACGAGGGGGTTCCTGGC     | lag  | S  | 1773284 | 1773299 |
| ydiC (1.2E-3)         | AAGAAGATAAAGCCAGCAATGCAC   | CAATAATAATTCATTTGGATT  | lead | AS | 385240  | 385255  |
| tgt (1.2E-3)          | GATTCACGACCTAATCTTCACAAAC  | CAGCTCTGCAACCAATTC     | lag  | AS | 155934  | 155949  |
| L200140 (1.2E-3)      | GTTTCGACCGAATTCGACTTCGCTG  | CATTAATCCCTTTCGCCATGG  | lag  | AS | 126575  | 126590  |
| hrcA (1.2E-3)         | ATAAATGCAATTTGTTCTTACTTCAC | CACTCCCAAACTTATAAAC    | lead | AS | 977222  | 977237  |
| intergenic (1.2E-3)   | CAATTTAATGATGCTTTCATTTTC   | TATTTGTTAATTAATCACTGAT | lag  | .  | 1712489 | 1712504 |
| ybaI (1.2E-3)         | CTCGGACCACTACACATACATAAC   | CTTTTGAAGTTCAGGATA     | lag  | AS | 110048  | 110063  |
| als (1.2E-3)          | CTCTTTCGCTCATGACCACTCAAC   | CATTTGCGGGCTTCCTCA     | lead | AS | 1200572 | 1200587 |
| kinB (1.2E-3)         | TGCTCAAAAGCTGTGTTCTCTGAC   | TAAATCATCAGCGCGGAA     | lag  | AS | 1459925 | 1459940 |
| intergenic (1.2E-3)   | ACTCCGATAGCTTTTTCACCTAAC   | CATGACTTTTGGTAAAGG     | lead | .  | 1838537 | 1838552 |
| gidB (1.2E-3)         | CCCTCGAAAGTTCGCTTTCATTCAC  | GGAGGAGCTGAAGATTTTC    | lead | S  | 1381124 | 1381139 |
| dexA (1.2E-3)         | GCTTGATAAATCAGAAATATCATAAC | CATTAATAATCCATTTGGCGA  | lead | AS | 1736522 | 1736537 |
| dtpP (1.2E-3)         | ACTAACCAAAAGCACCTTCACCGAC  | CTCGAGTCCCGTCAAGAG     | lead | AS | 705591  | 705606  |
| glnP (1.1E-3)         | CCGACATCATTCCTCAGCATGTC    | CAGACTGAACACAGCTCAAC   | lag  | AS | 1817828 | 1817843 |
| citF (1.1E-3)         | GCTGCTTTACCGTCCATGCCCTTGG  | CATTTACCCATTTCCGTCAGC  | lead | AS | 1209507 | 1209522 |
| xerD (1.1E-3)         | CATACAACTCAGGAAATTCCTTAAT  | CATTTGGATGATTAATTTGA   | lead | AS | 1310409 | 1310424 |
| feoB (1.1E-3)         | GCCCTTCGAACTTCGATGGTCATAAT | CTAAGCTCCCATTTCCATG    | lag  | AS | 191636  | 191651  |
| cydA (1.1E-3)         | TTTGATAAAGCTGAAATTCAGCAAC  | CACAAAACCAACAGTTACA    | lead | AS | 708282  | 708297  |
| citB (1.1E-3)         | CCGATAATCTGTTGCTTACTTCAC   | TTAATCAACATTTATCTGT    | lead | AS | 669535  | 669550  |
| uvrA (1.1E-3)         | GCAATAGTCATTAATTCCTCCAAC   | CCCTCCGACTGTGAACTGA    | lead | AS | 1888140 | 1888155 |
| yudR (1.1E-3)         | TCAGTTCTGATAGGCTCCTTCAC    | CTTTAATAATTTGCGCT      | lead | AS | 2038474 | 2038489 |
| ysdA (1.1E-3)         | CTCGCATGATTCGCACATACATTC   | CTCAATGCTGAABATTAATA   | lead | AS | 1834288 | 1834303 |
| pbuX (1.1E-3)         | CGAGCAACAGATTCACAAACACAC   | CAAGGACAACTGGTAAGCC    | lead | AS | 1160591 | 1160606 |
| purA (1.1E-3)         | GCTGTTCTGAAAGCTTACTTCAC    | CTGCGGTGAACTGGCCAT     | lag  | S  | 2029214 | 2029229 |
| ansB (1.1E-3)         | CTGTTTTCGATTCGATTTTTCAGAC  | CAACATATTCGATTAACG     | lag  | AS | 743480  | 743495  |
| plsX (1.1E-3)         | TTTTCAGTCTTTCACCAATCTCAAT  | ATTTGTTTCAACCTGCTAATA  | lag  | AS | 72013   | 72028   |
| citC (1.1E-3)         | GCCTAATCTGATTAGCATTCATGAC  | CACTCGCGCGGATTTTTC     | lag  | AS | 1207190 | 1207205 |
| yrfA (1.1E-3)         | TTTGACATAAATCAGAAATCTTCAAT | CGATATTCATTTATAGGG     | lag  | AS | 1750155 | 1750170 |
| busAA (1.1E-3)        | CAGCAATACCTTCTTCACTCCAAC   | AATCAACCGGAATTTGAC     | lead | AS | 1474728 | 1474743 |
| ysjA (1.0E-3)         | CTTGATGGATGACATTTTCCACAC   | ACCAACACGACAAACATA     | lead | AS | 1891247 | 1891262 |
| sdaB (1.0E-3)         | GTGTATCAACTTCTAAATACATAAC  | CGCTTTTCCACCTTAGCT     | lead | AS | 843991  | 844006  |
| pcrA (1.0E-3)         | TACCGCAACCAAGCTCCGCGATAAT  | CAATAAGTCCCGCTTCTGTA   | lead | AS | 1133849 | 1133864 |
| ymdE (1.0E-3)         | AAATGCCCTAAGTCAATTCATAAT   | CATTTCTGCGCATTCATCAC   | lag  | AS | 1238993 | 1239008 |
| pacI (1.0E-3)         | TTTGATGATCCCTGTTAATCATAAC  | CACATTCGCGGATTCGATCA   | lead | AS | 677844  | 677859  |
| yrfE (1.0E-3)         | CAATAACCAAGCAACCAATCATGAC  | CCCATGATACCAACCAATA    | lead | AS | 1759959 | 1759974 |
| busAB (1.0E-3)        | TGAACAGCTGCACTACACCCGAC    | CTAAGCCAGGCCCCCAAT     | lead | AS | 1473732 | 1473747 |
| ydiB (1.0E-3)         | TTTGCTAGCCCTCTTACACTTCAC   | CGAGAGCTTTGAGAAAGC     | lag  | S  | 383788  | 383803  |
| yniH (1.0E-3)         | TTCGCCAATTTACGACCTCTTCC    | ACTCGTACCAAGCCCAAT     | lag  | AS | 1387926 | 1387941 |
| ldhX (1.0E-3)         | ACTGCGCAGAATCAGCTTCTCTTC   | TAAATAATTCGCTTCTGTA    | lag  | AS | 1143148 | 1143163 |
| dacA (1.0E-3)         | TTAGAAATTTGACTAATTCATAG    | CATATCTGAAATTCGAAAC    | lag  | AS | 2356064 | 2356079 |
| ywaI (1.0E-3)         | TATCTTTACCAAGAAATTCCTCAAT  | CACTTTATTTCCGATTTTC    | lag  | AS | 2209257 | 2209272 |
| ywiA (1.0E-3)         | TCPTGCGCAATTCAGCAACTCTCT   | CAATATTTACCCGGATTTAC   | lead | AS | 2280352 | 2280367 |
| yrjD (989.1E-6)       | TTTCTTTACCAATTTTCCACTTCAC  | CATTTGGTTCGAAATTAACA   | lag  | AS | 1793542 | 1793557 |
| yweE (984.5E-6)       | TAAATCACGACATGCTCATTTTC    | CAACGGTCCGCCATTCAAAA   | lag  | AS | 2247499 | 2247514 |
| intergenic (976.0E-6) | GACCCCTTCADAAATTCCTATGAC   | TCCCTTTCCACAAAGAAA     | lead | .  | 1210567 | 1210582 |
| ykiF (975.7E-6)       | TCTAATACAAACCAATCTTCAGAAC  | TCAAGTTCCTTGTGATAAA    | lag  | AS | 1087045 | 1087060 |
| yuhY (971.4E-6)       | ATATCCAGCAAGGCAGAAACATTC   | CATTTCTCAAAATTTTGGT    | lag  | AS | 2077632 | 2077647 |
| thrA (968.9E-6)       | ACTTTTCGCGGATTCACACTTCAC   | GGTCTCACTGAAATTTACT    | lag  | AS | 747685  | 747700  |
| citG (967.4E-6)       | GCAATTCAGCTTCACAGACAAC     | CGTACTCTCAGGAACCTCC    | lead | AS | 1210681 | 1210696 |
| birA2 (953.2E-6)      | GTAAATTAAGCAATTTCTCTCTG    | CGTCTAATTTAGCATCTTT    | lag  | AS | 1973041 | 1973056 |
| aroH (943.5E-6)       | ACTGAGCGAGCCCACTTCATAGT    | ACTTACAGAACTCATCAAC    | lead | AS | 1280932 | 1280947 |
| intergenic (941.5E-6) | AAATAATTCATTTTTCATTCAC     | TCTGATTTAACCATGCTCA    | lag  | .  | 2355772 | 2355787 |
| yudH (937.4E-6)       | CTATAAAAGCCATATGCCCTTTC    | CCCTCACCCTCCACATCT     | lag  | AS | 2035315 | 2035330 |
| yiaC (935.3E-6)       | TCATCGTTAGATTAACATACAGGC   | CGCAATCTTGGCATTTGTA    | lead | AS | 802688  | 802703  |
| queA (934.9E-6)       | TAAGCCGCAAAACCAATTCACCGC   | CGCAAAAGCAGCGACTTA     | lag  | AS | 1617701 | 1617716 |
| intergenic (934.7E-6) | CAAAAGCTTGTATTTTTCACCTTC   | TATCGTCAAAATTTTAC      | lag  | .  | 1562466 | 1562481 |
| ysjD (925.9E-6)       | TTTATTACCTTGTGACGCCACTTCAC | CTGCTTACCAACGATAATCC   | lead | AS | 1893720 | 1893735 |
| yriB (925.7E-6)       | AAATCATAAACCCCAATCCGATC    | GTTCTTAAATCTTCAGTT     | lead | AS | 1786925 | 1786940 |
| clsB (917.3E-6)       | GAAGCCAAATATCTCTCCGCAATC   | CATATCATTTTATATAAA     | lead | AS | 1188127 | 1188142 |
| yeaC (913.3E-6)       | TGCAATGACCTCATTTACTTCAC    | GCACATCTCTCTCGAAT      | lead | AS | 405707  | 405722  |
| typA (909.9E-6)       | ATTTGACAACTGCAATTCACACGAC  | CAACAAACCACTTTATC      | lead | AS | 2093418 | 2093433 |
| fbxA (902.0E-6)       | TCACCCCAATGACCAACTTCAC     | ATTCACAGGAGATGCCCTT    | lead | AS | 1979895 | 1979910 |
| pbuX (893.7E-6)       | AAATGACCAAACTTCTGCTCCAGCC  | CATCTCTTCCACCAATTAAT   | lead | AS | 1160642 | 1160657 |
| yecE (885.8E-6)       | TTTCAATCAAGATTTACATACATAAC | CAAACTCTCTTTCGATTA     | lead | AS | 427531  | 427546  |
| trmE (884.6E-6)       | AAAACCAAAATGCGAATTCCTCTT   | CAACCAAGGGTCTCGAAT     | lag  | AS | 2327788 | 2327803 |
| pycA (880.8E-6)       | TCGTTTACACCGCATTAACATCTT   | CTTCTGTTAAACTCATTTTC   | lead | AS | 666290  | 666305  |
| fadh (875.8E-6)       | CCGCGGGACATTCATTCCTATCT    | CATCGGCAACAGCTGCTT     | lag  | AS | 654992  | 655007  |
| llrC (867.9E-6)       | ATTTTTCCTTGGTCCACCACTTCAC  | CATTTCCAGCAAAAGAAAG    | lead | AS | 1805025 | 1805040 |
| deoD (858.1E-6)       | ATATGACAACTCTCATTTACACAAAC | CAACAGTCCCAACAGAAAT    | lead | AS | 957096  | 957111  |
| fabD (857.2E-6)       | GCATATTCACCCCTCAACTTCAC    | CCCAATACATTTCTGTC      | lead | AS | 783367  | 783382  |
| clsB (849.2E-6)       | AAATATAGTCTTCCATCCATAAT    | CATTTTAAATAAACCCTT     | lead | AS | 1188106 | 1188121 |
| L200130 (847.7E-6)    | TTTGATTAAGATCAAACTCTCTTC   | CCACCTGCAACAGAGTCA     | lead | AS | 1980938 | 1980953 |
| intergenic (843.7E-6) | CCAACTCTCTTCTGTTGTTATTTT   | TATTTTAAATAGTTCTCT     | lag  | .  | 2275138 | 2275153 |
| apbE (842.3E-6)       | ACTGACCAATTTGTAATATCATAAC  | CTAATCTTTTACTGCTGAATA  | lead | AS | 1124691 | 1124706 |
| yagB (842.2E-6)       | CGTTCATATGCTCAACCCATGTC    | CATTCATTAATTTTATCAG    | lag  | AS | 67086   | 67101   |
| intergenic (841.1E-6) | AGGAAATTTACTCAGCCACTTCAC   | TAAACAGTCTGCTGATAA     | lead | S  | 970097  | 970112  |
| rplM (839.1E-6)       | AGTATATTACTCAGCCACTTCAC    | CCAGTGGATTCGAAATCAG    | lag  | .  | 2346912 | 2346927 |

|                       |                            |                      |      |    |         |         |
|-----------------------|----------------------------|----------------------|------|----|---------|---------|
| ylgC (837.8E-6)       | TCAGCTAAACCTGTATCTCAAGCC   | CAAAACAAGTACGGATC    | lag  | AS | 1162425 | 1162440 |
| yehI (833.8E-6)       | TATTCATGATAGCCCTCATCATAT   | GCCGCACTAAGCCCAATA   | lead | AS | 279650  | 279665  |
| yijE (825.2E-6)       | TATGATAAGATACATTTCTCTC     | AGCGCATGAAATTTGCTCT  | lead | AS | 897434  | 897449  |
| tgt (824.8E-6)        | TCCGCTTAAGARAGTTCACGTC     | CCATCAATGGCTCTGAA    | lag  | AS | 156150  | 156165  |
| ssbB (811.3E-6)       | GAAGTCCCTCCATACCTTTCAC     | GCCGAGATCTACTTCCGA   | lead | AS | 2274356 | 2274371 |
| fbaA (804.1E-6)       | ACAATATGTCCATCGTACTTCAC    | GGGGTTCGGTATCCCTCG   | lag  | S  | 1979644 | 1979659 |
| yjgC (802.2E-6)       | TCAGTAAATTTATTTAAACATTT    | TGCTTTGGCCAGCAATCC   | lead | AS | 963079  | 963094  |
| dexC (800.1E-6)       | GTCACCGTAATCTCTCCCATAT     | AAATACAGGCACCTCTGG   | lead | AS | 1737262 | 1737277 |
| ptsI (799.5E-6)       | GTAGATGGATCAATATTTTCAC     | CACTCAATCCCTCAACAGC  | lead | AS | 121312  | 121327  |
| pbp1B (794.1E-6)      | TTGGATCGCAGCATTTATTGCAT    | CCCAATTAAGCTGAAAT    | lead | AS | 393516  | 393531  |
| intergenic (793.8E-6) | CCGCGCAAAATTCACCAATGAC     | CAAGCATTATTCAGTCTG   | lead | .  | 2012509 | 2012524 |
| intergenic (787.6E-6) | TAAGAACCAACTTCATATCAAAC    | AACCATGGTACTTTTGG    | lag  | .  | 1931070 | 1931085 |
| citF (784.9E-6)       | TATTCAGTCCCTCAATACATAAG    | CCAACTCAATTTGGTGC    | lead | AS | 1209546 | 1209561 |
| argR (775.8E-6)       | CAATTCGGCAACCATGGCTCAAC    | CAATTTGTCGCAATAACC   | lag  | AS | 2117884 | 2117899 |
| relA (767.0E-6)       | TTTGTGTTCCCTCTCAACTTCAC    | GCCGATCTACTTCCGTA    | lead | AS | 108880  | 108895  |
| uppF (766.9E-6)       | AAGGTAAATCTGGCAACTTCAC     | GCTTACCAACCAATAATA   | lead | AS | 2275479 | 2275494 |
| intergenic (762.6E-6) | AAGGCTAAAGCCTTATATCATGCA   | TATTTCCAAATTTTATT    | lag  | .  | 1706685 | 1706700 |
| gshR (760.9E-6)       | TTGGCTGACCGCCTTCTCCGCAAT   | CACTAAATCTCTTTATGT   | lead | AS | 864313  | 864328  |
| flolI (758.3E-6)      | GCTTCGGCCATTGCTGTACTTCAC   | GTATTTAGCAGTGGCTTT   | lead | AS | 746840  | 746855  |
| asnB (757.2E-6)       | GTATCTAACTGCCATATCACTTCAC  | GGACTGCAAAAGTACATC   | lead | AS | 356922  | 356937  |
| yrfE (755.7E-6)       | TTGATTTTAAACCATTTTTCATACT  | CAAGAGGCTGTAATTTCT   | lead | AS | 1759098 | 1759113 |
| yxas (746.0E-6)       | TTTGTATTAGTTTCAATGACCAAT   | CATGATGGTACTTTCAT    | lag  | AS | 2301202 | 2301217 |
| menF (745.8E-6)       | CTGCATAAGCATTAATTTCTTTCTC  | CAATCAAAAGCCGAAACA   | lag  | AS | 738243  | 738258  |
| menD (742.6E-6)       | CAAAAGGGAGATCATCGACTGAC    | CATGTTGTCGTTCTCAAA   | lag  | AS | 737101  | 737116  |
| pbuX (735.3E-6)       | CAAGAATTCAACTGATATCATGGC   | CAGCAGATTAAGCTTAATCT | lead | AS | 1160419 | 1160434 |
| citE (733.2E-6)       | TTTCCATTTTCACTTCAGCTCTTC   | CATCATAGCTGCTGTTCA   | lead | AS | 1208386 | 1208401 |
| yljF (730.6E-6)       | GTTCGTTTCACTCTAATAGCATAAC  | TGCTTCAACACTTCCCAT   | lead | AS | 1196804 | 1196819 |
| noxB (724.8E-6)       | CCAGCTAGGCTCAATGACATAAT    | CAATGCTAATACCCCAATG  | lead | AS | 841599  | 841614  |
| ynbC (723.1E-6)       | TAAGATAAAGCTCAATCCATAAC    | CAACATTAATAAAGTAAACC | lead | AS | 1311441 | 1311456 |
| ysiaI (717.3E-6)      | TTGGACCCATGATTTCACTCCCAAC  | CATCTGCTTAAGCTGAAC   | lead | AS | 1882158 | 1882173 |
| hemI (711.6E-6)       | AGTCAATTTTCTGCTCACTACTTCAC | TTATAGCTCAAGTAAGTC   | lead | AS | 1608810 | 1608825 |
| lysO (708.4E-6)       | CCAAATGCAAAAGCCAAAGCAGGT   | CAACATCAAGCCGCCATA   | lead | AS | 369852  | 369867  |
| optC (697.2E-6)       | CTGATTAACACAGCTCAATCAATAT  | CAATCTTGGAAATCAAAC   | lead | AS | 348745  | 348760  |
| argT (694.2E-6)       | TCGTCCGACTTCACTGTTCTGCT    | CTAAGCACTTCCGCAAC    | lag  | AS | 2117915 | 2117930 |
| ylcC (690.3E-6)       | TGAAAGTGACAGCTCATCTCATTCG  | CTCAGGCTAACCTCTCATC  | lead | AS | 1130988 | 1131003 |
| dacB (690.1E-6)       | GTTCGGTTTACCTGATTTCACTTC   | CTTATCTGCTGTAATAGCT  | lead | AS | 976126  | 976141  |
| noxA (687.5E-6)       | ACGACTAAATATCAATCTCATACTC  | TATTTTATCTTATCTAC    | lead | AS | 840184  | 840199  |
| panE (685.1E-6)       | CCATCTATAAGCGTTACTTCATTCG  | CACTTTAAGGCAATTA     | lead | AS | 1358181 | 1358196 |
| clpC (681.5E-6)       | ACAATTTGCTTTTCCCTCACTTCA   | GTAGAAGATGGATTTGGTC  | lag  | S  | 630146  | 630161  |
| ytdB (680.9E-6)       | ATATCTAGCAGATTTCTTTTCAGAT  | TATTTCTAAGCTATCCAGC  | lead | AS | 1934966 | 1934981 |
| yqdB (680.0E-6)       | CGAATTAATCTGATTTTTCATAACT  | CATTTTCTCTTCAAGTGG   | lead | AS | 616221  | 616236  |
| L200159 (674.0E-6)    | CTTGGCGTTACCAACCTACTTCGG   | CTCTGCCAAGCCCGTGG    | lead | AS | 2363650 | 2363665 |
| glnP (665.5E-6)       | GAAGATTAATGAGCACTACCAATAT  | CGAAACTTCTTTCGAGC    | lag  | AS | 1817888 | 1817903 |
| recD (660.7E-6)       | TAGGCTCTTCCATTCGCTCCCTTC   | GGCCACCCGTTGTGCATA   | lead | AS | 1797401 | 1797416 |
| scrR (651.5E-6)       | GCGGAATATCATTGGTTTACTTCAC  | AATGGCTCAGAGCAATGGT  | lag  | S  | 1518450 | 1518465 |
| hpt (650.0E-6)        | ACATCTAGCATTTATTTTACTTCAC  | CACTGGATTTGCTCCGCC   | lead | AS | 25358   | 25373   |
| alaS (638.3E-6)       | TTAGCTTCAGCAACATTTACTTCAC  | TGGCGATTAAGTGTAGAGA  | lead | AS | 1778652 | 1778667 |
| htraA (635.8E-6)      | GTAGTGCTTTGATAGATTCCTTTTC  | CTCCAAGCTGCGATGGCTCC | lag  | AS | 2204392 | 2204407 |
| yjgC (635.1E-6)       | GCACTAGCAACCTCAATACCTTCAC  | CCGTTAATTTCTTGACT    | lead | AS | 962423  | 962438  |
| lepA (628.7E-6)       | TGCAAAAGCCCGAGGAACAACAAC   | GGATTCGAAACCAAGGCC   | lead | AS | 1118394 | 1118409 |
| rpsM (628.4E-6)       | CGTTTGATCTTATGTCGACTTCAC   | GCCGAAGGCTCTTCCGAG   | lead | AS | 2153631 | 2153646 |
| yagB (625.5E-6)       | TAAAGAATCTGATTTTTCCTCAAC   | CATACTCAAGTCTCTTAC   | lag  | AS | 66735   | 66750   |
| ybeH (625.4E-6)       | GATGATTAATCCCTTCCGTCATAT   | CAATTAATAGCTCAAGCA   | lag  | AS | 143096  | 143111  |
| intergenic (624.6E-6) | AAAAGCTCAAAAGGAGCACTCACT   | TAGCTTAATTAGCTAGTG   | lag  | .  | 820084  | 820099  |
| ilvD (621.5E-6)       | TCGATGCTCTGCACTCACTTCAC    | GCTGACCAAGCAATATCT   | lead | AS | 1246083 | 1246098 |
| pepQ (603.2E-6)       | AAAGACAGTCTTCAATCCCAACCC   | TCTTCCAGGATATAATA    | lag  | AS | 1698129 | 1698144 |
| efp (601.2E-6)        | GTTTGATGACTTCTTCCATAAC     | GCGGAGCACTCTTCCCA    | lead | AS | 691670  | 691685  |
| Intergenic (594.1E-6) | TTTGACTGAGACTCACTCTCTCC    | TCTTACTTTCAATCAAGCT  | lag  | .  | 2276493 | 2276508 |
| yqbr (590.7E-6)       | TTACAGATTTATGCAATCACTTCAC  | CACTACCTGGTACTTTTAA  | lead | S  | 1619709 | 1619724 |
| gidC (579.4E-6)       | CCAGAGCCAGCTGATTCATCACTG   | CCCTTTCATGCTCAATGG   | lead | AS | 1257813 | 1257828 |
| copR (575.7E-6)       | TTGCTCCCAAGTCAATTTTCAAT    | CATCTTCCGAAACAATGG   | lead | AS | 845396  | 845411  |
| citR (570.7E-6)       | GCCAAATTCGCGCAAGTTCATCTC   | TATTCATAAAGTAATATA   | lead | AS | 1206676 | 1206691 |
| yoaB (569.0E-6)       | TTTCTGGTCAACCCTTATCAATAT   | CCCTTAAAGCCGGCTTT    | lead | AS | 1404130 | 1404145 |
| choQ (557.7E-6)       | GGATCAACCTTTTCAGCACTTTTAC  | CCATTTCAACGACCTCAGT  | lag  | S  | 865510  | 865525  |
| yseI (557.7E-6)       | ACAACCCGCTGACCAATTACATTTAT | CATTTTCAAAATATCTTT   | lead | AS | 1849919 | 1849934 |
| ygaB (548.0E-6)       | ATTTCCACTCAATTAATATCTCGAT  | GATTAACCACTTCATAAGC  | lead | AS | 602141  | 602156  |
| malF (539.1E-6)       | AGTGGAAAAGGCTTTTCCGATAT    | CCCCGGAAACTTGAGC     | lag  | AS | 1740960 | 1740975 |
| parC (537.4E-6)       | TCAGCTACATCAACCGTACTTCAC   | ACGTTCAATTTGCTTCTCA  | lag  | S  | 1012443 | 1012458 |
| yrgH (536.8E-6)       | AAATGAGCTAATTTCTGGTCCCAAT  | CAATGATTAATCTTCTGTC  | lag  | AS | 1769355 | 1769370 |
| ykiF (535.2E-6)       | AGCCGCTTTAGCTTTTAAACAGGC   | GTATTTCTTCTTCCGAGTAA | lag  | AS | 1087227 | 1087242 |
| ps105 (530.7E-6)      | AAGGCTCTCACTCTCTCATCTTCAC  | ACCTTCCAGCAATAAAGGC  | lag  | AS | 37893   | 37908   |
| yuhE (521.7E-6)       | AGTCCCTCAGTCTTATTTTCACTTC  | CAAGGATTAAGGCTCCAA   | lag  | AS | 2073300 | 2073315 |
| yfjF (512.1E-6)       | CTTCAAGTCACTTCAATCTTCAC    | TGCAATGATTTCTGGGC    | lead | S  | 599610  | 599625  |
| leuA (511.8E-6)       | ATTTGATGTTTCTTTGCCACTTCAC  | CTATTCAGAGAAATATA    | lag  | S  | 1240133 | 1240148 |
| nrdD (499.2E-6)       | TCATAGTTTGTGCTCCCTACTTCGA  | GCTTAAGACCACCTTTGAG  | lead | AS | 271457  | 271472  |
| kdgR (492.7E-6)       | TTTCTTCCAGGACCAATTTCACTTC  | TGAAATTTTCCCTGTAAT   | lag  | AS | 1680250 | 1680265 |
| pepF (492.5E-6)       | TATTTCTTACCAATAATCCGTAATA  | CTTCTTCTGCTTTTTCAC   | lead | AS | 1783848 | 1783863 |
| rplC (486.0E-6)       | ACAGTGATTTCTGCTCTTACTTCAC  | CCCTTCTGAGTCTTTCGA   | lead | AS | 2169681 | 2169696 |
| comFA (482.4E-6)      | TCAACCTGTCAGCCCAAACTTCAC   | TAAAGCCGCACTCAATAAA  | lead | S  | 1097125 | 1097140 |
| topA (477.7E-6)       | AAAGCATTAATTTCACTCTCCGCTG  | CAACAATTAAGTTTAAGGC  | lead | AS | 1255147 | 1255162 |
| yveC (470.5E-6)       | ATTTCTAAACCTTCAATCAAGGGT   | CAAGGTTAAACTGATGAT   | lag  | AS | 2143864 | 2143879 |
| yeeB (465.5E-6)       | TTTCTTCGATCAATTTTCTCAAT    | TACCATCTCAAGCGCTAG   | lag  | AS | 443161  | 443176  |
| ybcG (460.1E-6)       | CTTGTTCATCTTTCATTTCCATTT   | CAATCATGAAATTTTACT   | lag  | AS | 123139  | 123154  |
| yqcA (456.8E-6)       | TAAAGCTCAATTCAGCGACTTCAC   | AACGCTGATAGTAAATTA   | lag  | S  | 1624880 | 1624895 |
| gyrB (456.5E-6)       | CCGATTTTTCAGTGTCACTTCAC    | GCGCACCTGCTGCAAT     | lead | AS | 929120  | 929135  |
| yeeE (453.5E-6)       | TTGTCAATATGTTGATAACCAACA   | CCAGGGCAGAAATAATAG   | lag  | AS | 443427  | 443442  |
| ybcH (450.7E-6)       | AAAGATATGATGTCCTCACTTCGA   | TGGTTTCCGAAATTAATA   | lead | S  | 123666  | 123681  |
| ylaD (448.7E-6)       | CCAAATTTGAAGTCACTCTTCAC    | GCCCAACCTGGCCCAAA    | lead | AS | 1105705 | 1105720 |
| mscL (446.4E-6)       | CCAAAGGCTAAGTCAATCACTTCAC  | CACTTAATAAAGCTTTAT   | lag  | AS | 2170604 | 2170619 |
| L200065 (444.5E-6)    | TGAAGATAAAACCTCAACAATTCAC  | TGAAATTTCCGCTTTCT    | lead | AS | 1745995 | 1746010 |



|                       |                            |                       |      |    |         |         |
|-----------------------|----------------------------|-----------------------|------|----|---------|---------|
| ymdE (437.5E-6)       | CTTCAGAGACCTTGGTCAACCTTCAC | GGAGGATGTCGCCACATACCG | lead | S  | 1238775 | 1238790 |
| yqg (432.8E-6)        | TTGGACCGCTTTTCTTTCATAAC    | CAATGGCATAATCCCATAC   | lag  | AS | 1664100 | 1664115 |
| yebE (428.7E-6)       | TATCTTCACCAATTAATTCRGTCC   | CTAATATGATGACGTTATC   | lead | AS | 417456  | 417471  |
| glnQ (427.9E-6)       | CTTCTTCGCCCAATTTTTCATAAC   | GGCTAGACAGGTGACCAACC  | lag  | AS | 1819582 | 1819597 |
| purI (424.0E-6)       | ATATCCAACACCCCGCTCCCTTCAC  | CAAGCCCAATCAAGACTTG   | lead | AS | 1576156 | 1576171 |
| yveH (422.8E-6)       | GTACCTTAATATGTTCCGCCCAAC   | AGGTGTGTTTTCACAGCA    | lead | AS | 2146197 | 2146212 |
| yrge (418.4E-6)       | GGATTTTCAAACATCACCTCCAC    | ACGGCCATCCGCCCTCCAA   | lag  | AS | 1765349 | 1765364 |
| intergenic (408.9E-6) | TCACCAAAAAGTCAATTAATTCAC   | GAATGAGCCATTAAGAAATA  | lead | .  | 1213718 | 1213733 |
| intergenic (405.0E-6) | TAGTTGCCAAAATCTCTCCATTTTC  | CTTTATACCTGATTAATA    | lag  | .  | 1766419 | 1766434 |
| clpB (402.4E-6)       | AGGTGAACGTGAAATTAATTAATTC  | TTGCCAGAACACTGCATC    | lag  | S  | 1567554 | 1567569 |
| infB (401.7E-6)       | TCTTCACTGATCCACCTCCCTTCAC  | CCGAGTACACCGGATTC     | lead | AS | 777180  | 777195  |
| pi301 (401.6E-6)      | TTCTGCAGATACATCCCACTTCAC   | GAAGATTAATAAGATTT     | lag  | S  | 1414528 | 1414543 |
| pbp2A (400.0E-6)      | GCCTGTCATCCACAGTTCCTTCAC   | TTGCAGAACCAAACTTA     | lead | AS | 2178563 | 2178578 |
| gntR (391.4E-6)       | GTATCTGAAATTAACAAAGCAAT    | CTTCGCTCCGTAATTTTGC   | lag  | AS | 2272040 | 2272055 |
| ymjE (387.4E-6)       | CTGTATAGATTGTCARAGCATAT    | CACAGCAATCTCAAAAAT    | lead | AS | 1297570 | 1297585 |
| purC (385.1E-6)       | GATGAAATTTCCCTGATTAATTCAC  | GTCTCTGGAGCCGAATGG    | lag  | S  | 1577698 | 1577713 |
| radA (383.9E-6)       | TGCATCAATCTCCAGTCCATTCAC   | CTAACCTGACCTTACGAGCC  | lead | AS | 2149928 | 2149943 |
| ydbA (381.9E-6)       | ACAATTAAACCTGTGGCAACTTCAC  | ATGCAGCCAGCACTCTAC    | lag  | S  | 311295  | 311310  |
| yhdB (381.5E-6)       | GATTAATCCACCCGCATAGCAATTC  | CACAAAGCCGGCGAGTNG    | lead | AS | 731959  | 731974  |
| vacB2 (379.1E-6)      | ATGGTCAGAACTGATTAATGCAAC   | AATAGCAGTGAATTAATAA   | lag  | AS | 1227759 | 1227774 |
| gyrA (368.5E-6)       | AAGCGCGAAATCTCTCTCTTCAC    | AACCGTAAACCGAATTTGT   | lag  | S  | 1123616 | 1123631 |
| glgR (367.5E-6)       | CCATCATCTCTTACCAAACTTCAC   | CACCAATCTTACTTCAAC    | lead | AS | 700438  | 700453  |
| topA (364.2E-6)       | TCTAAATTTGCTCAAGCACTTCAC   | CCATGACCTTCTCTTCT     | lead | AS | 1256226 | 1256241 |
| ycjB (360.6E-6)       | TTTTCCAAATTAATGTTACTTCAC   | CACGATTAATCCGTCAGC    | lead | AS | 291861  | 291876  |
| intergenic (355.9E-6) | ATAACCGCTACCCACCTTATTCAC   | AATAGCATTTTCTCATCT    | lead | .  | 1781130 | 1781145 |
| aspS (352.2E-6)       | TTTTCGGAAAGCAATTAATTCAC    | GGATATTCCTTTCCAGC     | lead | AS | 2040291 | 2040306 |
| pepA (349.6E-6)       | TAGTCCGAAACGATCCCTCAAAAC   | CACAGTCCGCTTCAATTC    | lag  | AS | 394928  | 394943  |
| yrjI (345.7E-6)       | CCGTCAACAACTTAAGTCAATTC    | CCATTTAGAAATCAACAA    | lead | AS | 1799737 | 1799752 |
| yahI (345.5E-6)       | ACAARAAGCTGCTTTCATTCAGAGC  | TAGTAACATCCAGTTTAG    | lag  | AS | 78146   | 78161   |
| yyal (345.4E-6)       | CCAACTATATCTTTTCTCTTCAC    | GCAGCGACCCGCTCCAGC    | lead | AS | 12154   | 12169   |
| ywjI (344.8E-6)       | TCTCCCAAAACCCCTTCACATAAC   | CACATAGCCCGCTTAGGAG   | lead | AS | 2299894 | 2299909 |
| apl (341.8E-6)        | TAATCCCTAAATCACAACTTCAC    | TGAGAGCTAAGAAATCAAGA  | lag  | AS | 719117  | 719132  |
| ygeA (341.2E-6)       | TCACTTAACAGAGGTTTATCAAGAC  | TCCGTTCAATTAAGTCAA    | lead | AS | 647001  | 647016  |
| rliA (340.4E-6)       | TTAAAGAAGACATCATCCATAAC    | TCCAGAGCCGCTTTCATTT   | lead | AS | 1728090 | 1728105 |
| ddl (335.8E-6)        | AACCTAACATCTTTCACAACTTCAC  | CTGGAAAGCCCTCGAAGAC   | lead | AS | 341407  | 341422  |
| gltB (335.2E-6)       | AAGAAGCCGTTGACAGTACTTCAC   | AGGTAACAGCAAGAAAT     | lag  | S  | 1318756 | 1318771 |
| prsa (331.9E-6)       | AACTTGCAGCGCTCTCTTTCAC     | CATGGTCAAGCCGACACGAC  | lead | AS | 826166  | 826181  |
| yfic (328.7E-6)       | AGCAAAATCTTAATAATCCGATTC   | CTCCCAATCCCTTCTTTC    | lag  | AS | 582039  | 582054  |
| yhnc (328.0E-6)       | TCTGTCAGTGAAGCAACTTCAC     | CCATATCTTTCGCCGAAC    | lead | AS | 1375536 | 1375551 |
| yseF (319.5E-6)       | CTTCAACAAAGATTTCAACCACTCC  | TGCTTGAAGGACTTTCGA    | lead | AS | 1846805 | 1846820 |
| gidA (317.5E-6)       | ATGGATTAACATGGCATAAAGGCAC  | CATATTTAGATTAATTCGCT  | lead | AS | 1916173 | 1916188 |
| foeB (317.2E-6)       | TAAGTGCTACTTTAAACAACCTTCAC | TAACTCTTAAATTTTAAAG   | lag  | AS | 191685  | 191700  |
| vacB1 (316.8E-6)      | GAAAATTAATCCGCACTTTCATTCAC | CAATCTCCGCTTATCCGCA   | lag  | S  | 968723  | 968738  |
| ahpP (314.9E-6)       | TCAAACGATTCATAATCCACTTCAC  | TTTGAATCTTAAAGTGAAT   | lag  | S  | 336370  | 336385  |
| reox (313.1E-6)       | ATATCATCATATGAAATGCTTTCAC  | TGCGCAAGCCGCTGTGTAC   | lag  | AS | 2260546 | 2260561 |
| clsB (312.1E-6)       | CCATTAATAGCCCTTATTAACAGAC  | CATTTATAAATCCGGAATA   | lead | AS | 1188583 | 1188598 |
| gntR (311.2E-6)       | CCCGCGGACTCTTCAAAATTCAC    | CCGCTCAAGCTTATCTCTG   | lag  | AS | 2272093 | 2272108 |
| ygiI (310.7E-6)       | GTGTAACTGCTCTTTCATTCAC     | CACGATTAAGCCATGGTGT   | lead | AS | 688022  | 688037  |
| cydB (307.4E-6)       | AGCAATAAGCAATACAACTTCAC    | CAGCATTAAGAACAAAATA   | lead | AS | 709788  | 709803  |
| tyrS (302.1E-6)       | CCGTGAACCTAAGCTGACAACTTCAC | AGCCAACTTATTTGGGC     | lag  | AS | 390395  | 390410  |
| ykhD (301.5E-6)       | AAATCAATAAGCAATAATCCAGAC   | CGAGATTCGCAACCAAT     | lag  | AS | 1072414 | 1072429 |
| busAB (298.6E-6)      | TCCGTTGGTTTACACCAAGCCATAAT | TCTTCTTAAAGCCAAAGGA   | lead | AS | 1473829 | 1473844 |
| glnP (298.6E-6)       | CCATTGGACCGCAATTCCTAAGC    | CAATGTTAAACATTTCAAT   | lag  | AS | 1818260 | 1818275 |
| intergenic (293.2E-6) | TCAAGAACTCCCAAAAGAGTGACCC  | CACCAATTAAGAACAAAGT   | lead | .  | 426554  | 426569  |
| yrdB (287.3E-6)       | GGAATGGAAACTGATTAATCAATTC  | TACATTAATTAATTTGAT    | lag  | AS | 1748835 | 1748850 |
| yljB (286.4E-6)       | GGCATGAGTATTAATAATCAATTCAC | GATTTCCATAAGATTCAG    | lag  | S  | 1183134 | 1183149 |
| pmsX (284.1E-6)       | TCATCATAAAGAAATCAATTCATTC  | CAAAATTAAGCAATTCACTGC | lag  | AS | 1594083 | 1594098 |
| ysfB (283.9E-6)       | CCCTGACGACGTTTACCAATTCATTC | TGCTCGCAAAAATTCGCA    | lead | AS | 1851913 | 1851928 |
| aroB (283.2E-6)       | ACAACCACTTTTCGTTTACTTCAC   | ATCCCGAATGATTAATTC    | lead | AS | 1814163 | 1814178 |
| frdC (283.0E-6)       | TTAAGTTCAGCAGCAGAACTTCAC   | CCAGATTAACCATTCATTC   | lead | AS | 1138856 | 1138871 |
| cysE (273.6E-6)       | GTHTCCCAATTAATAATCCAGAC    | CATGGTCAAAATTAAGACTCC | lead | AS | 1920560 | 1920575 |
| grpE (270.4E-6)       | TTTCCAAAACGCTTACCAACTTCAC  | CGAGCTTACTCTCTCTGAG   | lag  | S  | 978363  | 978378  |
| intergenic (269.5E-6) | AAATCAATTAATAACTAGACCCAG   | TTATTTAACAATAAAGT     | lead | .  | 228110  | 228125  |
| tra983F (269.2E-6)    | GCGACGAGCTTTCATTTCTTCAC    | CGCCCTTAACTCCGGATAG   | lag  | AS | 1556004 | 1556019 |
| dut (267.2E-6)        | CGGTCAATACATGTAAGCACTTCAC  | CTGCCCTCAATTAAGCCCTT  | lead | AS | 181327  | 181342  |
| carB (267.2E-6)       | AGSGCTTGAACGCTTTTACCACTTC  | GAACCTGCCAATAATCAAA   | lead | AS | 1399755 | 1399770 |
| lepA (262.4E-6)       | GCCTTGAAGCGGCTGTCCAACTTCAC | CTTGAGGGCGAGGACTTTC   | lead | AS | 1117932 | 1117947 |
| rpcC (261.0E-6)       | GATTTTGTAGTGGGAGAACTTCAC   | CACGGTGAATCCACTTTC    | lead | AS | 2166108 | 2166123 |
| ycfD (257.7E-6)       | AAGCGCTAATCATCTCCCTTCAC    | CATTAATAAGACGAAAGGC   | lead | AS | 252972  | 252987  |
| intergenic (256.9E-6) | AAATCCATAAATTTCTTACACTTC   | CTATATTAATGATTAATAAT  | lag  | .  | 2071740 | 2071755 |
| hslO (256.3E-6)       | CGGTCCCTCTCTCTTTCACAGTTC   | AGGCTGAATCCCAAGGAA    | lag  | AS | 2034366 | 2034381 |
| atp (254.9E-6)        | CGCACCTGATACATCAATATCAGGA  | TTACGTTTCCAGACCTTCG   | lead | AS | 1822759 | 1822774 |
| yhch (253.6E-6)       | ACATCAAACTCCAAACGCTCATTC   | CAATGTTTCTCCCAAGAC    | lead | AS | 726528  | 726543  |
| pepT (253.1E-6)       | AAAACATGCAAGAAAGCTTCCAGGC  | CTTCGGTTTTTCTCGGACG   | lead | AS | 1877702 | 1877717 |
| ylhB (248.3E-6)       | GAGCAAGCGGTGATGATCCAGGAC   | CAATAATAATTAATTCGGG   | lead | AS | 1173578 | 1173593 |
| intergenic (246.6E-6) | ACATCCAAATTTTCTTTCATAAAA   | CATCTCCAAATTTATTTAA   | lag  | .  | 2208612 | 2208627 |
| apl (243.5E-6)        | GAAATGGTGGGAACTATGCTCAAT   | CATTAATGAGAAAGGCAACA  | lag  | AS | 719582  | 719603  |
| pspA (243.5E-6)       | AGAGAGGACTGCTTATACCAATTC   | CCAGAACCTGATTAATAAT   | lag  | AS | 2304554 | 2304569 |
| hemN (240.9E-6)       | TATCCATGATATATTCATACATTC   | CGCTTTTAAATCTCACTTC   | lead | AS | 1153916 | 1153931 |
| ymcF (239.7E-6)       | TTCTTCCTCATCAATCACTTCAC    | CATTAATTCCTTATGAAATA  | lead | AS | 1223916 | 1223931 |
| proS (239.7E-6)       | TCTTTCATTAATTCACAACTTCAC   | CTGTCGCAAGATTTAAC     | lead | AS | 2196190 | 2196205 |
| rplL (238.7E-6)       | AAAAGATGTACCACTTAACTTCAC   | CTGATCTGACAGCCGTTGG   | lag  | S  | 753478  | 753493  |
| fhs (238.7E-6)        | GCTAATACTCTGCTAATAACCCAGC  | CGGACGCTCCACCCCTAAT   | lead | AS | 960069  | 960084  |
| yrfE (237.9E-6)       | TCTTGAAGTTTACTGCTCCATAAT   | CTCCCTCATCATGAGC      | lead | AS | 1759268 | 1759283 |
| ispA (235.9E-6)       | CCATATCCAAAGATTTGACCCGAC   | CATTCCTAAGAAACCCGAA   | lead | AS | 881180  | 881195  |
| L200149 (232.9E-6)    | CGACCGCTCACCCCTTACATTCAC   | CTTCCGGTTTTACGAGAG    | lead | AS | 2219499 | 2219514 |
| hsdR (232.7E-6)       | GTHTGATCACTAAGTCCACACTTC   | CATCAATAAATAAATAACAT  | lead | AS | 641728  | 641743  |
| glgA (232.0E-6)       | CAATATCTAGAAATTAATTCATTC   | ACCCCTTTTTTCTGACTTC   | lead | AS | 698612  | 698627  |
| rdrB (229.4E-6)       | TCTTTGCCAATTTGCAATTCCTCC   | CATGAAGCTGAAAGCAATTC  | lag  | AS | 1331986 | 1332001 |
| yqr (226.9E-6)        | TTTGAACTGAACTCAATCACTTC    | CGGCCAAACACTTATTC     | lag  | AS | 723823  | 723838  |

|                       |                           |                      |      |    |         |         |
|-----------------------|---------------------------|----------------------|------|----|---------|---------|
| pi148 (226.7E-6)      | CTTCCTGGAACTAATGACTTCAC   | TCATGCGCCAAATAAGGG   | lag  | S  | 482353  | 482368  |
| yjbb (225.2E-6)       | AGGGAGATAAATGCTAACCGAACA  | CATCCACCTGCGAAGAGA   | lead | AS | 911052  | 911067  |
| ps315 (222.8E-6)      | GAATACATTATCTTTTACTTCAC   | TCACAATAAAGGAAAGAC   | lag  | AS | 2023936 | 2023951 |
| yqgg (220.9E-6)       | TCATACCAATGGCATATCCACATA  | CCCGAGCAAAATTAATCG   | lag  | AS | 1664082 | 1664097 |
| pi201 (220.2E-6)      | CTATACCAATATCTCTTATTCGAC  | ATCTGTTCTGGGCTTTTGG  | lag  | AS | 1037038 | 1037053 |
| intergenic (219.7E-6) | CTTCTATAAATTAACCACTACTCAC | TATCTCTCTAATAATTCAG  | lag  | .  | 565296  | 565311  |
| hsl0 (216.9E-6)       | ACAAAACGAGCACTACACTTCAC   | CAGTCTGAGCTTTTATATA  | lag  | AS | 2034601 | 2034616 |
| ptcc (216.4E-6)       | CGCTCAATTACTCTCCCTACTTCAT | AGCCAGTGGAACTTTTACT  | lead | AS | 421115  | 421130  |
| ycjM (216.3E-6)       | GTATTCTGCTCCCAACAACTTCAC  | CGAAGAGAAATCAATTTGG  | lag  | S  | 299901  | 299916  |
| celB (212.9E-6)       | ACCTCGATCTGAGCTTACTTCAC   | AGTATATTATTTGGGTCGCC | lag  | S  | 178101  | 178116  |
| ytce (212.2E-6)       | ATACACCCGCTTCAACAGTGCATC  | CATTTGGAAAGAAATTTTA  | lag  | AS | 1929213 | 1929228 |
| ftsH (211.5E-6)       | CTATAGAAAGGACTCTCTCTTCAC  | CGGCAACAGCCCTTCCAAG  | lead | AS | 26613   | 26628   |
| yljG (211.5E-6)       | TTTCCCTGATAGACTTTTACTTCAC | CTTCTGTGAAATTTTAT    | lead | AS | 1197636 | 1197651 |
| dlte (211.4E-6)       | CGCTCGTTTGTGCTAACAACTTCAC | CATAGGGGCAAGTAAACA   | lead | S  | 144478  | 144493  |
| topA (209.0E-6)       | TCAAGCTCTGGTAACTCATCAAC   | CATAGAATACTTATTTT    | lag  | AS | 1256515 | 1256530 |
| citC (200.9E-6)       | CATATCCCACTAATAGAACCCCTCC | CATAGCACTTACCATTTTTC | lead | AS | 1206875 | 1206890 |
| mutS (197.6E-6)       | TTTCTTGAACCTTCAATCACTTCAC | CGCTTTTCTTCCAACTT    | lag  | AS | 1692486 | 1692501 |
| rgpA (197.2E-6)       | CCACCAATTGTCCTCCCTACTTCAC | GCATCTCAAAATTAACCA   | lead | AS | 202268  | 202283  |
| intergenic (194.6E-6) | ATCGTAAACAAATCACTACTTTT   | CATCTTATCAAGTAAATA   | lag  | .  | 172797  | 172812  |
| trxB1 (194.5E-6)      | CCAAAACCTTTTCTACTTCAC     | CGCTTTTAAACCTTTTATA  | lag  | AS | 966106  | 966121  |
| yveC (194.1E-6)       | AAGTACCGACCTTGTAAACAGGAC  | CACAAACGTAACCTACGAC  | lag  | AS | 2143762 | 2143777 |
| trmE (194.0E-6)       | CGAACATGGCAATTCCTCTTCAC   | CAGCGCTTCCGCAATCTCC  | lag  | AS | 2327785 | 2327800 |
| yvaA (192.3E-6)       | AATTCAATTGCTCTTAACTTCAC   | CATCCAAACGACTCTGGAA  | lag  | AS | 2100504 | 2100519 |
| ptnc (191.7E-6)       | ATAAGGTTGATACCATTCATTAAC  | CACGGGCAACAACCATCC   | lag  | AS | 1763862 | 1763877 |
| yeac (191.3E-6)       | ATAACAAAAAGATGGTCACTAAC   | CATCTTAAACGTAATAAT   | lag  | AS | 407850  | 407865  |
| ldh (189.0E-6)        | TCTCATGCTTGGCATTTACTTCAC  | CTAAATAACATTTAATCTCC | lag  | S  | 1370008 | 1370023 |
| ylcG (188.5E-6)       | AGATTTCCTTCACTCACTTCAC    | CCCAATGCTCCGCAATCTT  | lead | AS | 1131775 | 1131790 |
| yciA (184.1E-6)       | CCAAATAAAGATATTCACTTCAC   | AGTCCCTSCAAATAGTCT   | lead | AS | 280687  | 280702  |
| ytjF (183.8E-6)       | AGATGATATAGCACTGACATAAC   | CATCTTTCTGCGATGATG   | lead | AS | 1997999 | 1998014 |
| intergenic (182.9E-6) | GGCTGATTAAGCACTTTCATTTT   | CATTTAGGCACTTTCAT    | lead | .  | 1880376 | 1880391 |
| L200155 (182.9E-6)    | TAAACGTTGCTGGGCTTATTCAC   | TCCGCTGGCTTTTACACC   | lead | AS | 2342297 | 2342312 |
| dpsA (182.1E-6)       | TTATAGTAATTAACCTACTTCAC   | CTAAATCACTTCCGCAATG  | lead | AS | 2102154 | 2102169 |
| pepN (180.9E-6)       | TTAGTTGCAAAACCACTACTTCAC  | CAACGATTTTCTTTTCC    | lead | AS | 302960  | 302975  |
| yogI (180.4E-6)       | CTCTTACTACTCGGGATTCCTTCAC | TGATCTGACCTTCTGTTAAC | lag  | S  | 1467652 | 1467667 |
| gyrA (179.5E-6)       | GGTGTATATTTACTCATAACTTCAC | CGACAATACGTCGGGATTT  | lead | AS | 1121968 | 1121983 |
| recX (177.9E-6)       | AATGTATAAATCGTAACTTCAC    | TATATCACTCATATGAAA   | lag  | AS | 2260573 | 2260588 |
| pspA (177.3E-6)       | CATGCACTGCTTCTCTATAAT     | TCCGCAAGAGCCATCAAG   | lag  | AS | 2304308 | 2304323 |
| ycgD (176.4E-6)       | TAGCCATTTGTTGATTAACCAAC   | CAACATGGCAATTTAAG    | lag  | AS | 264664  | 264679  |
| intergenic (174.5E-6) | TTGCTATATTTCTGTCACTTCAC   | TCCTTTCAAACTAAAT     | lead | .  | 1171031 | 1171046 |
| pi149 (174.1E-6)      | AAAGTACCTTATCATGACTTCAC   | GTATGCTCCAAAGTAA     | lag  | S  | 482537  | 482552  |
| noxB (173.9E-6)       | CCACACAACCTGACTCAACTTCAC  | GACCTGACAGGACCGG     | lag  | S  | 841457  | 841472  |
| hom (172.9E-6)        | TCTGCCAAGCCGCAATTCATTC    | CATGAACAGCCGTAATAC   | lead | AS | 1171374 | 1171389 |
| ybjJ (172.0E-6)       | GCATTGGCTTTTTCCTCTTCAC    | CAATATTAACGCCACAAT   | lag  | AS | 193714  | 193729  |
| era (170.0E-6)        | GAAATGTAGCCGATTTACTTCAC   | AAATGGCTTCTGTAAGT    | lag  | S  | 355476  | 355491  |
| tral077B (168.4E-6)   | TTTCTTACTACCGCTCTACTTCAC  | CTTATCTGAAATATGAT    | lead | AS | 139417  | 139432  |
| yniD (167.6E-6)       | TCTTCTCAAGCGGTTCACTTCAC   | CCCTTAAAGCTCAGAT     | lag  | AS | 1389428 | 1389443 |
| intergenic (167.1E-6) | CGTTTCTTCTCAATTTGTTAATC   | CATTAATCAGGCAATTC    | lag  | .  | 146664  | 146679  |
| ykiF (165.9E-6)       | ATGCAACGGCTTTTCTCTACTTC   | CAATAGCCATTTACTTCA   | lag  | AS | 1086658 | 1086673 |
| yqbr (165.8E-6)       | ATTACATTTAGGATATAGTACTTC  | ATACCTCAATACCATCA    | lag  | S  | 1621593 | 1621608 |
| yuhI (164.7E-6)       | TTAGCAATTTCACTAATATCAAT   | CATGAGGCACTCAATTTCC  | lag  | AS | 2077908 | 2077923 |
| yrjA (163.1E-6)       | TAAATGACGTTTCACTTCCCTCC   | CATGCTAAATTTATCTT    | lag  | AS | 1790453 | 1790468 |
| rheB (158.7E-6)       | CAAGCTCATTTAGGGCTCTTCAC   | GTCACTGACTCAAAAT     | lag  | S  | 416038  | 416053  |
| vacB1 (158.5E-6)      | GCPTTTTTCATTTTTTCACTTCAC  | GTCTAGCACTAACCCGCG   | lead | AS | 968864  | 968879  |
| secA (156.8E-6)       | CCAAACCAACCGCGGCTCTTCAC   | GACTGACAGCAATGCTTC   | lead | AS | 116558  | 116573  |
| pi252 (153.7E-6)      | AAGGTAACTTACTCAATGACTTCAC | GTATGGCCCTCAATAGTAA  | lag  | S  | 1070851 | 1070866 |
| ywfe (153.6E-6)       | TGAGTTGCGAGCTTGAAGACTTCAC | CGCTCTCAGGGTCAACAGA  | lead | AS | 2253509 | 2253524 |
| kupa (153.2E-6)       | GCAAAGCAACCAACCAATCTTC    | GGTAAATTAACCAATTT    | lead | AS | 609826  | 609841  |
| adhE (152.2E-6)       | CCGGCACTGAGCAAGCACTTCAC   | CAAGCAAGGACTCTTC     | lag  | AS | 2231413 | 2231428 |
| intergenic (151.0E-6) | TCTACTTAAAGATCTCTATTTCAC  | ATATAATAAAGCCGTTTC   | lag  | .  | 767701  | 767716  |
| carB (149.3E-6)       | ATTGCTATCCACTTCACTTCAC    | CTTATTAAGAGCAATCAAC  | lead | AS | 1399233 | 1399248 |
| rexB (148.9E-6)       | TGCTCTGGAGTTTATTTACTTCAC  | TCATCTCGCCCTCTCTTC   | lead | AS | 6410    | 6425    |
| rexA (148.9E-6)       | TGCTCTGGAGTTTATTTACTTCAC  | TCATCTCGCCCTCTCTTC   | lead | AS | 6410    | 6425    |
| L200139 (147.0E-6)    | TAGCTCAGTCTGTAGACCACTTCAC | TCGTAACGAAGGGCTCACA  | lead | S  | 155265  | 155280  |
| ytca (146.1E-6)       | ATGGAAATTCATCCCTCATTTTCAC | AAATCATCTAATTTTATAT  | lag  | S  | 1919841 | 1919856 |
| ybfE (145.3E-6)       | CTTGGAGATTGTAGCCCAATTCGCG | CCAGAAATAAGCCGCGTCA  | lag  | AS | 158953  | 158968  |
| rplU (143.4E-6)       | TGCTTCCCAATTTTTCGACTTCAC  | CAACAACAGTCCGCCCTTC  | lead | AS | 1090794 | 1090809 |
| nadr (143.2E-6)       | TGAGCACTACCTCATTTACTTCAC  | CAACAAGCAAGCAAGAC    | lead | AS | 2067466 | 2067481 |
| accC (141.8E-6)       | GCAACTGTACCACTCTCAATTCAC  | GAGCTGCAGATTAATCT    | lead | AS | 787362  | 787377  |
| intergenic (141.1E-6) | CACACATTTCTCTCATTTCTAGAT  | TATAAATCAAAACCAAT    | lag  | .  | 1765147 | 1765162 |
| pacA (140.5E-6)       | TCATCTACTCATCTACTGTACTTC  | CAATATCTGACGCCACTTC  | lead | AS | 1149790 | 1149805 |
| clpC (138.9E-6)       | TTCATGGAAAACTTCTCGACTTCAC | GCCTGATTTGGGCTCCTTC  | lag  | S  | 631578  | 631593  |
| ropC (138.0E-6)       | ATTTCTTCTGCTTTTAACTTCAC   | CGAATGCTCAGTAACGAAT  | lead | AS | 1860730 | 1860745 |
| yugD (136.4E-6)       | CTTAACTCTTCTCACTTAACTTCAC | CGCTTAACTTCCGCTTC    | lead | AS | 2069632 | 2069647 |
| yseE (133.9E-6)       | AGAAAACAAAATCTCTCACTTCAC  | AGCCCTTTGGCTTAAAT    | lead | S  | 1845334 | 1845349 |
| ygiI (133.8E-6)       | GAATGCATAATCGCACCAAGGAC   | CAAGCCCTTTCTTAAAT    | lead | AS | 687818  | 687833  |
| yvdB (133.8E-6)       | CCAACTCTTAAATCCACCACTTC   | ACGGTAAAGCTTAAAT     | lead | AS | 2132376 | 2132391 |
| yrbA (133.2E-6)       | CAGAAGTAATCGCATTTACACCACT | CAATAATAAAGTCCATCA   | lag  | AS | 1710889 | 1710904 |
| ldh (132.5E-6)        | CGCGTTGTAGCTTCAAGTACTTCAC | TTGCACTGCACGTTTCCG   | lag  | S  | 1369738 | 1369753 |
| yoiC (129.4E-6)       | CGTGGATCTCAGCAGATACTTCAC  | AGGTGGTACAAGTCTACT   | lag  | S  | 1486078 | 1486093 |
| uxac (128.3E-6)       | AGTTGTAATGTTGCACTCTTCAC   | CTTGAATCAGACCCATCT   | lead | AS | 1673326 | 1673341 |
| pepF (128.1E-6)       | AAGTATCTACTTGTAAACTTCAC   | CGGACAGCACTCTTCAAG   | lead | AS | 1783404 | 1783419 |
| ytdF (126.8E-6)       | GAAACTCTCTTTTCAAACTTCAC   | GTGCAAGTAATACCATCAAC | lead | AS | 1937543 | 1937558 |
| ymjE (126.6E-6)       | TCTTCACTGATTTTCTTTCAC     | CATTTTAGAGTTGAAATA   | lead | AS | 1296165 | 1296180 |
| ypiA (125.6E-6)       | ATTCTGGAGTACCTCATTAATTCAC | GAACCGCCATTTTGTTCG   | lead | AS | 1580173 | 1580188 |
| yvdD (125.2E-6)       | GTCTCTTCTGCTTATATACTTCAC  | AAATATCTGACCCCTTTCAC | lag  | S  | 2134298 | 2134313 |
| noxB (125.0E-6)       | TTTCTCATCACTATGCGACTTCAC  | GCCTTGGAAATTAACCTT   | lead | AS | 843000  | 843015  |
| xylH (124.4E-6)       | AAAATGCTCTGACCACTTACTTCAC | CATCTCACTCTTAA       | lead | S  | 568328  | 568343  |
| intergenic (121.8E-6) | AAATATAGTATGAAAACCTACTTC  | CGGTCCCAACTCTTCTTC   | lag  | .  | 1247526 | 1247541 |
| yxca (121.2E-6)       | TAATCACTCATTTTCACTTCAC    | CATATCAACCTAGTCC     | lead | AS | 2323787 | 2323802 |
| chiA (121.1E-6)       | ACGGCATTTCTGCTTTTCACTAAC  | CTGTCTCCACAGCCGCAAT  | lag  | AS | 2027406 | 2027421 |

|                      |                            |                      |      |    |         |         |
|----------------------|----------------------------|----------------------|------|----|---------|---------|
| yngG (120.4E-6)      | CGCCCTCGTCCGGAGAGCACCC     | CAATACCTGCAAAAGATTAG | lag  | AS | 1368216 | 1368231 |
| ysjD (119.8E-6)      | TTGTCCGCACTTCACTGCTTAC     | CAGAAATCCCAAAACTT    | lead | AS | 1893729 | 1893744 |
| yhdA (117.1E-6)      | TATTSACTCGAGCCGATTCGATAC   | TTGCCATACCAGCTGGAT   | lag  | AS | 731594  | 731609  |
| secA (116.6E-6)      | TGACGTTGCGCTAATATAACTTAC   | GTTCCTCAGGATGACATC   | lead | AS | 118226  | 118241  |
| glpB (115.5E-6)      | ATAAGATCCGTTACTGAACTTAC    | TCGTCCCACTCCGCCCAAA  | lag  | S  | 1271169 | 1271184 |
| rpoB (114.1E-6)      | TGTCATGTACATGATTAACCTTAC   | CACTCGGTTGATGATAAAC  | lag  | S  | 1861379 | 1861394 |
| arcC (113.9E-6)      | GTTAAGCATGCCAGATTTACTTAC   | TTGCAATCGGCAAAACTT   | lag  | S  | 1752051 | 1752066 |
| nifs (113.8E-6)      | GCCGACGGAACTTCCACCTTAC     | TTATAGAGAAAATTCGG    | lead | S  | 1928168 | 1928183 |
| dnaJ (113.8E-6)      | TTCCAGCAAGATTTTCAACTTAC    | ATTCCTAGAAAGCTCCGGA  | lead | AS | 2307464 | 2307479 |
| rplD (113.0E-6)      | ACCGAGTCGTTAGGTAACTTAC     | CGCTCTCGAACCACTCTTG  | lead | AS | 2169254 | 2169269 |
| ygfC (112.4E-6)      | TTTAAACAGCCATATAACGCGGT    | TGCCCTTTTCGGTCGATAG  | lag  | AS | 654295  | 654310  |
| tkk (112.3E-6)       | AGCAAGGCACCCGTTAACTTAC     | AGCAGGCTAGCCAAAGAT   | lag  | S  | 1670095 | 1670110 |
| glnA (111.5E-6)      | CCCTTGATTCGGTACCCCTTAC     | GTGCCTTGCACACTCGTGT  | lag  | S  | 2282652 | 2282667 |
| ywfH (109.7E-6)      | GCTCCACCCGTTCCCTACTAC      | TTGTATCACCAGGATGAAA  | lead | AS | 2259140 | 2259155 |
| xynB (109.4E-6)      | TTTAAAGACATGGAGCCACTTAC    | AGTCCATTCGCGCAACCA   | lag  | S  | 1544759 | 1544774 |
| yqeL (108.2E-6)      | TCCGAGGATGTGTTCAACCTTAC    | GTTCCTCCGGGCACTCT    | lag  | S  | 223614  | 223629  |
| ygdA (108.1E-6)      | ACTTTTCGTGCAGAACTTACTAC    | AGCAATGTAATGCTTCAAT  | lag  | S  | 632597  | 632612  |
| relA (107.1E-6)      | TCCCTGAATCCACCTTCTTAC      | GCACTCCACAGTTCATAG   | lead | AS | 108310  | 108325  |
| yfgG (106.7E-6)      | CAAGATATATGCCGGCTCAATAT    | CAACATTCGCACTCTCTGAT | lag  | AS | 564603  | 564618  |
| ackA1 (106.2E-6)     | AAATATGGCGCTCATGGAACCTTAC  | ACATGTCCTGCTTCAAGA   | lag  | S  | 2090551 | 2090566 |
| leus (105.8E-6)      | TTTCCGCTAGTGTATTAACCTTAC   | GTTCCTCCCTAATACAAA   | lead | AS | 827793  | 827808  |
| yrgH (105.8E-6)      | TCTAAAGAAATGAGCTAATTTCCG   | CCCATCATAGAAATCTTTC  | lag  | AS | 1769316 | 1769331 |
| carB (105.4E-6)      | CCACCGAGTATTTTTCACCTTAC    | GGACATTAAGCCATTTTC   | lead | AS | 1398537 | 1398552 |
| llrB (104.3E-6)      | AGSGTCAAAATTTCCGATCATO     | CAAGCAATAAAATTTT     | lag  | AS | 1458179 | 1458194 |
| glk (103.8E-6)       | ATGCTTTTAGAATGCACCTTAC     | CATGTCCTAATGCTGCTT   | lag  | AS | 2101334 | 2101349 |
| yqab (103.7E-6)      | CTAAATATCAGGACACACACATA    | CAATATGACCCCCCATTC   | lead | AS | 1603759 | 1603774 |
| hds (102.3E-6)       | CCGTTTAGAAATGTGCAACTTAC    | CCACTACGTTCTTCCCA    | lead | AS | 646049  | 646064  |
| adhE (101.2E-6)      | CCCTACATCTCCCTTCTTAC       | GTGCTTCAGCTTTGTAGAT  | lag  | AS | 2230834 | 2230849 |
| snf (101.0E-6)       | ATTATATATCAGAGCATACTACTC   | CAGCGAACCACCGTTCCT   | lead | AS | 2121892 | 2121907 |
| ptcC (100.8E-6)      | AACGTTGCCGCTTATTCTACTTAC   | TTGCTTCCGACGAGCAAT   | lag  | S  | 421301  | 421316  |
| ptcB (100.3E-6)      | AACCTTAAAGATTTAATCACTGAC   | CATACTTACCAAAATTC    | lead | AS | 1177294 | 1177309 |
| L200152 (99.6E-6)    | CCAGTCGCTTACTCACACCTTAC    | CCGCTCATAGGATCGTCA   | lead | AS | 2263088 | 2263103 |
| ykjK (98.8E-6)       | CAAGTCCAACCTTACTACTCCAC    | CAACTCTTCTTCTGCTT    | lead | AS | 1100315 | 1100330 |
| cpmB (98.4E-6)       | ACATCAACCAATTTTCTCCTTAC    | GTATATCAACCCATGCGCC  | lead | AS | 198632  | 198647  |
| yshA (98.2E-6)       | TCTTTGGTGTATTTGCTACTTAC    | AATTCGCTCAACATGAAAG  | lag  | S  | 1875454 | 1875469 |
| rbfA (97.6E-6)       | AGCTCATCAATTTTGAACCATAT    | CAACAGATCACTTTCG     | lead | AS | 779168  | 779183  |
| tuf (96.2E-6)        | GAACTCAAGTTCGTCCACTTAC     | GGATAGCAAGATTCAC     | lead | AS | 1929416 | 1929431 |
| fadD (96.1E-6)       | CCAGGCATACCCATCCCATTTAC    | GGCCATTAGCTCTGCTA    | lag  | AS | 655043  | 655058  |
| yucC (96.1E-6)       | TTAAAGCCGCGGTCACCTTAC      | TTTGAAGATCAATTTTCC   | lag  | AS | 2028169 | 2028184 |
| yhfC (95.8E-6)       | GGTGAAACGATTGAAATTAATTAC   | AATTCGCTCAACATGAAAG  | lag  | S  | 755166  | 755181  |
| yahA (95.6E-6)       | AAGAACCACCTTCTCAACATTTAC   | CATACTTCACTTGGTCA    | lag  | AS | 72409   | 72424   |
| recM (94.5E-6)       | CCGACAAATCTCCGAAGCACGCC    | CACCATAAATAAAGACAT   | lead | AS | 883236  | 883251  |
| relA (94.2E-6)       | TTACTTGATTCGGTTTAACTTAC    | CTTCATCAGCTCTCGGC    | lead | AS | 108916  | 108931  |
| ycjM (93.0E-6)       | TCTAACCAATCCTTGGCTTCTTAC   | TCACAACGGATATCAGCTG  | lead | AS | 300722  | 300737  |
| dtpT (92.8E-6)       | TGGTTCTTGGCAAGATTCACCTTAC  | AAGCAACAGGCTCAAAAT   | lag  | S  | 705765  | 705780  |
| ps311 (92.7E-6)      | AAATAGGCAGCGCTTCTGACTTAC   | AGCTAGTGAAGTCTGAGAA  | lead | AS | 2021054 | 2021069 |
| nusA (92.4E-6)       | TCGAAATCTTCTTCCACGACTTAC   | CGTCCGATTAACCAATGAA  | lag  | AS | 773993  | 773993  |
| yvcC (92.4E-6)       | TAACTGTAGCCACTCCTTCTTAC    | TTATGATAAAGATTTACC   | lead | AS | 2124348 | 2124363 |
| pfl (91.4E-6)        | GTCATTAATGAGCTGCAACTTAC    | TTGAGCTGCTCCATGCT    | lag  | S  | 658237  | 658252  |
| rpe (91.0E-6)        | TTTTCATATTTTCTCAACTTAC     | CATTAAGCAACATATGACC  | lead | AS | 2003231 | 2003246 |
| citF (90.5E-6)       | TATCBAATCAATTTTAACTTAC     | GATGATTAACAGCAAGCT   | lead | AS | 1210497 | 1210512 |
| menE (90.0E-6)       | TCCGCTTAGCCACAGGCTCAAT     | CTGTGATTTCCAGGAGAGA  | lag  | AS | 733083  | 733098  |
| usp45 (89.7E-6)      | TCTGACCTCAGAGTTCATTTAC     | AGCAGGCTGAACCTTAAAGT | lag  | S  | 2313993 | 2314008 |
| yxfC (88.4E-6)       | ACCGCATCTACTAGGTTTCAATAT   | CATGAGGCTGATTAATGAA  | lead | AS | 2359357 | 2359372 |
| leucC (87.1E-6)      | CTCCGAACACAGCTCTCTTCTTAC   | GTACGCTCAACCTGCTTGG  | lead | AS | 1242999 | 1243014 |
| yeeC (87.0E-6)       | TTCATGAGTCTGCAATGACTTAC    | GTGGTGAAGCCCGCCACC   | lead | AS | 446315  | 446330  |
| ptnD (86.8E-6)       | TCGATATCAGCCCTGTTAGCACT    | CTTCTCAAGGGCAAGAGT   | lag  | AS | 1764360 | 1764375 |
| ywaF (84.5E-6)       | CGTTCTTGAATTTTCATTCGAC     | CAATCTCGAAGCTCAAT    | lag  | AS | 2205732 | 2205747 |
| guaA (84.3E-6)       | GGTTCCACGTTGTCCGAACTTAC    | CAACAGGCTCAATTTGCTGC | lead | S  | 1517292 | 1517307 |
| yeeF (83.5E-6)       | TCAGAGATTAATTTCTTACTTAC    | CATGGCTCAAAAATTAAT   | lag  | AS | 445089  | 445099  |
| hacC (83.5E-6)       | TTGTAAAGCCCTTTAATCACTTAC   | CTTAGGCTCAATGACACC   | lag  | AS | 1378400 | 1378415 |
| lacZ (83.0E-6)       | TTAGGATCAATTTGTCAACTTAC    | TAAACAACAAATTAATATC  | lead | AS | 2055873 | 2055888 |
| yjdB (82.2E-6)       | GAAATCTTGAATGTAAGAGGAA     | CAATCTTCAACCTCCATC   | lead | AS | 933438  | 933453  |
| atpH (81.8E-6)       | ATGAAGCAACAGTAAATTAACAGT   | CAATGAAAAAATCTCGGT   | lag  | S  | 1827415 | 1827430 |
| thrs (81.6E-6)       | TTTCATCATCTGGGAAATTAATTAC  | TCTACTTAAAGGGTCAAGG  | lead | AS | 1987780 | 1987795 |
| malE (80.4E-6)       | TACCTTGGTAAGACTCTCTCTTAC   | AATACTGACAGCTCAATTA  | lead | S  | 1740226 | 1740241 |
| zwf (80.1E-6)        | TTGATTCGACTTAACAACACTTAC   | GATTAATCTGCTTCTTCA   | lag  | AS | 2301470 | 2301485 |
| bgIH (79.8E-6)       | TCCGCAATTTACGATTCGACTTAC   | CTTAAACAGGAGTAAAG    | lag  | S  | 1490018 | 1490033 |
| noxE (79.7E-6)       | CTTTTGTATGCCAAGTACTTAC     | TTGCTCAAAATTTGATGA   | lag  | S  | 397135  | 397150  |
| ptbA (79.5E-6)       | ATPTTAAATCGCGCTGAAACTTAC   | CTGTAAAGGCAAAATATAGA | lead | AS | 1491561 | 1491576 |
| tenA (79.5E-6)       | GCGATTTGACGGTACCTTCTTAC    | TCCGATTCGCTTCAATCCA  | lead | AS | 1838849 | 1838864 |
| yeeA (79.4E-6)       | TGAACAAATTCGATTTGCTTAC     | CGATCAACCCGCACTGCA   | lag  | AS | 440775  | 440790  |
| yeeA (79.1E-6)       | ACTTTTCCAGCTTCAACGACTTAC   | GTCCGCTTTTCTGTTGGAT  | lag  | S  | 441510  | 441525  |
| cpo (79.1E-6)        | ATTTGGGAAACCATGTAACCTTAC   | TGGCCGTAAGCCCAAT     | lead | AS | 834569  | 834584  |
| vacB2 (78.8E-6)      | CTTCTTAAATGAGAGAGCCCTACTC  | ACCGGCTACACCTGCTTAT  | lag  | S  | 1226984 | 1226999 |
| yyaL (78.6E-6)       | ATATTATCAGCTTCCCTACTTAC    | CTTCTGAAACATGCTTAC   | lead | AS | 11749   | 11764   |
| yljF (78.4E-6)       | AAAGCCGCAACACTTCCGCGGGT    | CAACCAATGACTACAGG    | lead | AS | 1195850 | 1195865 |
| intergenic (77.3E-6) | AGCTTGGACTAGAAATTAATCTTAC  | AAATGCTTACTCGTAA     | lag  | .  | 1980330 | 1980345 |
| intergenic (76.6E-6) | ATAGACGAATTTCTTTTCTTCTTAC  | CATTTGGTACCTCTTTTAA  | lead | .  | 1293417 | 1293432 |
| ymjE (76.0E-6)       | AAGTCCGATCTTCACTTCCATCTTAC | CAATAACAGTACCACCTAG  | lead | AS | 1297164 | 1297179 |
| cysS (74.5E-6)       | GAATCTTACGCTGTTCAACTTAC    | TTTATAGCCCAAAATTCGA  | lag  | S  | 1918936 | 1918951 |
| oppD (74.2E-6)       | TCCCTCAATTCCTAATTAATCTTAC  | CACTCTAAGACTTAAATC   | lead | AS | 1910699 | 1910714 |
| intergenic (74.0E-6) | AAATTAATGCAATATGACTTCTTAC  | AGCGCACACTTCAAAA     | lag  | .  | 1830442 | 1830457 |
| hom (73.8E-6)        | ATTTCATAAAACAGCATTCATAT    | ACCTTGCACCTGGCCAAAT  | lead | AS | 1173717 | 1173732 |
| intergenic (73.7E-6) | TGGGACTTTGAAATACTCTTCTTAC  | GGATGATAAATTAATAA    | lag  | .  | 47610   | 47625   |
| trpS (73.5E-6)       | AGACCGCTCAACAGGAACCTTAC    | ATCCGCTCACTGATAGGCT  | lead | S  | 68223   | 68238   |
| serS (73.0E-6)       | AGAGCTAAAATTCACCTCTTAC     | ACTTCTAATGCTTCCGGAC  | lead | S  | 1768329 | 1768344 |
| kinC (72.8E-6)       | GAGCGAATGCTTTCATTCGCA      | TCAATGCTCTCAATAGTAA  | lag  | AS | 402440  | 402455  |
| dnaK (72.4E-6)       | AGCCGCTGCTGGCCCTTCTTAC     | TTGGAAATGGCTTCACTC   | lag  | S  | 979257  | 979272  |
| nusA (72.2E-6)       | GTTCGATTTCTTCCCATCTTAC     | CCACGATTCATAATCATC   | lead | AS | 774845  | 774860  |

|                      |                |              |         |         |         |
|----------------------|----------------|--------------|---------|---------|---------|
| amyY (72.1E-6)       | GCCGAGGCGCTTGA | CCACAA       | AS      | 1733687 | 1733702 |
| ptcB (71.4E-6)       | ATTTTCGCTTTT   | CTTTCATGAAGG | AS      | 419068  | 419083  |
| yqfG (71.2E-6)       | TTTCTGATATTT   | TTGGTTGGAGC  | AS      | 1659783 | 1659798 |
| pts1 (71.1E-6)       | TCAAAATAGATG   | CAAGGTTGTTAC | AS      | 120832  | 120847  |
| tra904I (71.0E-6)    | ATTTGTTGGCTG   | GGATGCGAGATA | S       | 2215294 | 2215309 |
| yciB (70.9E-6)       | TTGGTGAATTC    | ACCGTGGCGG   | S       | 290558  | 290573  |
| purB (70.9E-6)       | TTAGCAACAAT    | CTTCCAGATT   | AS      | 1688986 | 1689001 |
| pgk (70.5E-6)        | CAAGCTTACGAA   | TCGGTGGAGAT  | S       | 243525  | 243540  |
| glyQ (69.6E-6)       | CTCATTTGTTCC   | TATCATAGCTT  | AS      | 1101918 | 1101933 |
| ymdC (68.5E-6)       | TCAGAAATTTCC   | AATCCGTAACA  | S       | 1234116 | 1234131 |
| yliB (68.0E-6)       | GATTTGATTTTC   | AGATAATCAAG  | S       | 1181868 | 1181883 |
| ilvC (67.6E-6)       | TTAGTACCGCT    | ATGTTCAAGGCC | AS      | 1249913 | 1249928 |
| intergenic (65.9E-6) | TCATTTCTTCC    | TTATGATGGCT  | .       | 297420  | 297435  |
| ylgC (65.6E-6)       | GTGTTTAAAGCT   | CATACAGGCAC  | AS      | 1162306 | 1162321 |
| racD (65.6E-6)       | GTAGAACCTAA    | AATTCATTTCC  | AS      | 2309368 | 2309383 |
| ypb (64.6E-6)        | TTGGCGCTTCA    | TCCATACAGCC  | AS      | 1562082 | 1562097 |
| trpB (64.3E-6)       | GATTTGCTTTP    | CCATATGAACT  | AS      | 1495502 | 1495517 |
| pycA (64.1E-6)       | ATGTTATCTCT    | AGCTGGTCAAG  | S       | 664950  | 664965  |
| pepM (63.9E-6)       | GGTTCATAAAG    | GATAGTGAATC  | AS      | 303152  | 303167  |
| ccpA (63.7E-6)       | GTCCTTTCCT     | CATTTCAACAC  | AS      | 1696846 | 1696861 |
| yfjB (63.5E-6)       | GATTTTCAAA     | TGCAGGAAAT   | S       | 598934  | 598949  |
| polC (63.5E-6)       | TTGATTCGCT     | CATTCAGCGCA  | AS      | 2191543 | 2191558 |
| yqgC (62.4E-6)       | AACGATTCAC     | TCATTCGGCTT  | AS      | 1666094 | 1666109 |
| pydA (62.2E-6)       | TAAAGAACTTT    | AAGCTTAAAGT  | S       | 1593286 | 1593301 |
| ilvD (62.1E-6)       | CCACTTAAAG     | GGATGTTTCC   | S       | 1246820 | 1246835 |
| gyrA (61.6E-6)       | TCATCTTCAAG    | CTAAGAACTG   | AS      | 1123222 | 1123237 |
| ykiG (61.5E-6)       | CAAGTTCAT      | TTTCATGCTT   | S       | 1088003 | 1088018 |
| yjgE (60.7E-6)       | TTTAAATTA      | CTTGAACCT    | AS      | 964786  | 964801  |
| trpE (60.7E-6)       | GGACGAGCT      | CGGTCACCT    | AS      | 1500446 | 1500461 |
| rbsR (60.2E-6)       | CCATCCGCG      | GAATGACTC    | AS      | 1686674 | 1686689 |
| ylbB (60.0E-6)       | CGATATATATA    | GTGTGACTC    | AS      | 1113813 | 1113828 |
| ydbA (59.9E-6)       | TGATTTCTCT     | CTTGATAACT   | AS      | 312783  | 312798  |
| ylgG (59.9E-6)       | CAGATTAAG      | CTTGAATTT    | AS      | 1168308 | 1168323 |
| rplC (59.8E-6)       | GCAGCTTTT      | TTGGTCAAA    | AS      | 2169777 | 2169792 |
| ynhC (59.5E-6)       | TCCATTTTAG     | AGTTCAACT    | AS      | 1374723 | 1374738 |
| pepN (59.1E-6)       | GCAATTAAC      | AGTTGACAT    | AS      | 303201  | 303216  |
| aroB (59.1E-6)       | TTGATGAC       | CTCCCGAGT    | AS      | 1814295 | 1814310 |
| glmU (59.0E-6)       | GTTRCTTCR      | CCCTCGTAA    | AS      | 1951674 | 1951689 |
| hsdR (58.9E-6)       | CTTTGATAA      | AACTTTTTC    | AS      | 642226  | 642241  |
| acca (58.9E-6)       | GCAATATTT      | TTTGTGAAC    | AS      | 789638  | 789653  |
| yshA (58.7E-6)       | ATTTTTHCA      | ATTTCTTGA    | S       | 1875797 | 1875812 |
| rplL (58.6E-6)       | ACTTTGAAT      | CAAGCCCTC    | AS      | 1301775 | 1301790 |
| leuS (57.9E-6)       | TTATCCATC      | CTGTCAGGA    | S       | 827588  | 827603  |
| ywjB (57.7E-6)       | ATGAGGCTT      | CAAAAGACT    | S       | 2296014 | 2296029 |
| era (57.3E-6)        | TTGAACGCT      | CTTCCATCA    | AS      | 355313  | 355328  |
| papL (57.2E-6)       | AGGATTTAA      | AAACGTCGT    | S       | 1602930 | 1602945 |
| gyrA (57.1E-6)       | GCCGACATG      | TTTGTCCGA    | AS      | 1123879 | 1123894 |
| ylcF (56.7E-6)       | AGTAAATAA      | TTTATATTC    | AS      | 1128157 | 1128172 |
| ylfB (56.2E-6)       | AAATTCAA       | AGATGACCG    | AS      | 1152026 | 1152041 |
| ilvH (56.1E-6)       | GATTAATTT      | TAATCAGAC    | AS      | 1249451 | 1249466 |
| pstE (54.4E-6)       | TTTTCGCTC      | CTGCTGCTC    | AS      | 1775284 | 1775299 |
| citE (54.3E-6)       | CCCTTGA        | CAAAAGCT     | AS      | 1208696 | 1208711 |
| uvrA (54.3E-6)       | TAACTCTC       | CCCTGGCA     | AS      | 1886165 | 1886180 |
| Intergenic (54.2E-6) | TGCTGAC        | CAAGCCAC     | AS      | 165032  | 165047  |
| pdp (54.1E-6)        | GAATAAAG       | CTGAGCAAT    | AS      | 1464552 | 1464567 |
| valS (54.1E-6)       | CCCTCTC        | CCCTGCTC     | AS      | 2249627 | 2249642 |
| ytgG (53.6E-6)       | TTTGTGAT       | CTACTGATA    | AS      | 1969240 | 1969255 |
| aspC (53.4E-6)       | GCTCAATC       | AGTCTGTA     | S       | 163533  | 163548  |
| yhdB (53.2E-6)       | GGAGTCGT       | CAAAACA      | AS      | 732748  | 732763  |
| L200158 (52.9E-6)    | AGCGCTT        | ATCCCTCC     | AS      | 2360508 | 2360523 |
| intergenic (52.5E-6) | GGAAATC        | CTGTTGCT     | AS      | 1041037 | 1041052 |
| frdC (52.4E-6)       | TGATTTA        | CAAGATCC     | AS      | 1138793 | 1138808 |
| nrdG (51.7E-6)       | TAAAGTGA       | CCAGCCACC    | AS      | 272742  | 272757  |
| bcat (51.4E-6)       | CCATAAT        | CTTTGGCAT    | AS      | 1322017 | 1322032 |
| apl (51.0E-6)        | GTGGAGAG       | ATCTTCAAT    | AS      | 719594  | 719609  |
| ytbA (50.9E-6)       | TCAATCAG       | CTGTCAGAA    | AS      | 1913156 | 1913171 |
| copA (50.6E-6)       | TGAACAA        | CAACCCCT     | AS      | 846827  | 846842  |
| ywff (50.2E-6)       | GTCACAAA       | ATAATTTG     | AS      | 2255346 | 2255361 |
| yebB (50.1E-6)       | GAAGAGT        | TATTTAG      | AS      | 411411  | 411426  |
| recN (50.1E-6)       | ATAATAT        | TCGATTTAT    | AS      | 884734  | 884749  |
| ybcC (49.8E-6)       | GTGCATCAT      | TAAACAGCAT   | AS      | 122935  | 122950  |
| yibB (49.8E-6)       | TGACTTGAA      | AGCAAGTAA    | AS      | 813101  | 813116  |
| pi229 (49.6E-6)      | ACTAAAC        | AGAGAAATA    | S       | 1052899 | 1052914 |
| ypdB (49.1E-6)       | TCAGCAG        | ATATTTT      | AS      | 1532502 | 1532517 |
| fusa (48.9E-6)       | ACAACCA        | CTCAGCTGG    | AS      | 2354018 | 2354033 |
| ydbA (48.0E-6)       | TTGATTA        | AAAGTTG      | AS      | 311876  | 311891  |
| intergenic (47.3E-6) | AAAACNT        | TAGCAAGG     | .       | 295167  | 295182  |
| ysiE (47.3E-6)       | TAAATAA        | CACTTGTAT    | S       | 1889135 | 1889150 |
| pflA (46.7E-6)       | ACGTCAG        | AACCCACAT    | AS      | 1880728 | 1880743 |
| yoic (46.6E-6)       | TTCACAG        | AGCCAGAC     | S       | 1486532 | 1486547 |
| apt (46.5E-6)        | TCGTATG        | TGCTTCAAT    | AS      | 623066  | 623081  |
| intergenic (46.3E-6) | ATCAAAT        | ATACTGCTG    | .       | 1413891 | 1413906 |
| ypjA (45.7E-6)       | ATAATTT        | TTTTGAT      | AS      | 1590916 | 1590931 |
| tuf (45.7E-6)        | TCTTTGCT       | CAATGCT      | AS      | 1929629 | 1929644 |
| galK (44.7E-6)       | AATAAG         | ATGCTTTT     | AS      | 2061130 | 2061145 |
| yhcH (44.1E-6)       | CCAAATA        | AAAAAC       | AS      | 727005  | 727020  |
| ohtC (43.3E-6)       | TGGAAT         | TTTAAATA     | S       | 347900  | 347915  |
| yldA (42.9E-6)       | AGCACC         | CGAACTCT     | S       | 1132657 | 1132672 |
| yliB (42.9E-6)       | ATATTTCT       | TCTTATCT     | S       | 1182872 | 1182887 |
| ydiA (42.7E-6)       | GAGAAG         | CTATGATG     | S       | 381887  | 381902  |
| lead                 | AS             | 1733687      | 1733702 |         |         |
| lead                 | AS             | 419068       | 419083  |         |         |
| lead                 | AS             | 1659783      | 1659798 |         |         |
| lead                 | AS             | 120832       | 120847  |         |         |
| lead                 | S              | 2215294      | 2215309 |         |         |
| lead                 | S              | 290558       | 290573  |         |         |
| lead                 | AS             | 1688986      | 1689001 |         |         |
| lag                  | S              | 243525       | 243540  |         |         |
| lead                 | AS             | 1101918      | 1101933 |         |         |
| lag                  | S              | 1234116      | 1234131 |         |         |
| lag                  | S              | 1181868      | 1181883 |         |         |
| lead                 | AS             | 1249913      | 1249928 |         |         |
| lead                 | .              | 297420       | 297435  |         |         |
| lag                  | AS             | 1162306      | 1162321 |         |         |
| lag                  | AS             | 2309368      | 2309383 |         |         |
| lead                 | AS             | 1562082      | 1562097 |         |         |
| lead                 | AS             | 1495502      | 1495517 |         |         |
| lag                  | S              | 664950       | 664965  |         |         |
| lead                 | AS             | 303152       | 303167  |         |         |
| lead                 | AS             | 1696846      | 1696861 |         |         |
| lead                 | S              | 598934       | 598949  |         |         |
| lead                 | AS             | 2191543      | 2191558 |         |         |
| lead                 | AS             | 1666094      | 1666109 |         |         |
| lag                  | S              | 1593286      | 1593301 |         |         |
| lag                  | S              | 1246820      | 1246835 |         |         |
| lead                 | AS             | 1123222      | 1123237 |         |         |
| lead                 | S              | 1088003      | 1088018 |         |         |
| lead                 | AS             | 964786       | 964801  |         |         |
| lead                 | AS             | 1500446      | 1500461 |         |         |
| lead                 | AS             | 1686674      | 1686689 |         |         |
| lead                 | AS             | 1113813      | 1113828 |         |         |
| lead                 | AS             | 312783       | 312798  |         |         |
| lead                 | AS             | 1168308      | 1168323 |         |         |
| lead                 | AS             | 2169777      | 2169792 |         |         |
| lead                 | AS             | 1374723      | 1374738 |         |         |
| lead                 | AS             | 303201       | 303216  |         |         |
| lead                 | AS             | 1814295      | 1814310 |         |         |
| lead                 | AS             | 1951674      | 1951689 |         |         |
| lead                 | AS             | 642226       | 642241  |         |         |
| lag                  | S              | 789638       | 789653  |         |         |
| lag                  | S              | 1875797      | 1875812 |         |         |
| lead                 | AS             | 1301775      | 1301790 |         |         |
| lag                  | S              | 827588       | 827603  |         |         |
| lag                  | S              | 2296014      | 2296029 |         |         |
| lead                 | AS             | 355313       | 355328  |         |         |
| lag                  | S              | 1602930      | 1602945 |         |         |
| lag                  | S              | 1123879      | 1123894 |         |         |
| lead                 | AS             | 1128157      | 1128172 |         |         |
| lead                 | AS             | 1152026      | 1152041 |         |         |
| lead                 | AS             | 1249451      | 1249466 |         |         |
| lead                 | AS             | 1775284      | 1775299 |         |         |
| lead                 | AS             | 1208696      | 1208711 |         |         |
| lead                 | AS             | 1886165      | 1886180 |         |         |
| lag                  | .              | 165032       | 165047  |         |         |
| lead                 | AS             | 1464552      | 1464567 |         |         |
| lead                 | AS             | 2249627      | 2249642 |         |         |
| lead                 | AS             | 1969240      | 1969255 |         |         |
| lag                  | S              | 163533       | 163548  |         |         |
| lag                  | AS             | 732748       | 732763  |         |         |
| lead                 | AS             | 2360508      | 2360523 |         |         |
| lag                  | .              | 1041037      | 1041052 |         |         |
| lead                 | AS             | 1138793      | 1138808 |         |         |
| lead                 | AS             | 272742       | 272757  |         |         |
| lead                 | AS             | 1322017      | 1322032 |         |         |
| lag                  | AS             | 719594       | 719609  |         |         |
| lag                  | AS             | 1913156      | 1913171 |         |         |
| lead                 | AS             | 846827       | 846842  |         |         |
| lead                 | AS             | 2255346      | 2255361 |         |         |
| lead                 | AS             | 411411       | 411426  |         |         |
| lead                 | AS             | 884734       | 884749  |         |         |
| lag                  | AS             | 122935       | 122950  |         |         |
| lag                  | AS             | 813101       | 813116  |         |         |
| lag                  | S              | 1052899      | 1052914 |         |         |
| lead                 | AS             | 1532502      | 1532517 |         |         |
| lead                 | AS             | 2354018      | 2354033 |         |         |
| lead                 | AS             | 311876       | 311891  |         |         |
| lag                  | .              | 295167       | 295182  |         |         |
| lag                  | S              | 1889135      | 1889150 |         |         |
| lead                 | AS             | 1880728      | 1880743 |         |         |
| lag                  | S              | 1486532      | 1486547 |         |         |
| lead                 | AS             | 623066       | 623081  |         |         |
| lag                  | .              | 1413891      | 1413906 |         |         |
| lead                 | AS             | 1590916      | 1590931 |         |         |
| lead                 | AS             | 1929629      | 1929644 |         |         |
| lead                 | AS             | 2061130      | 2061145 |         |         |
| lead                 | AS             | 727005       | 727020  |         |         |
| lag                  | S              | 347900       | 347915  |         |         |
| lag                  | S              | 1132657      | 1132672 |         |         |
| lag                  | S              | 1182872      | 1182887 |         |         |
| lag                  | S              | 381887       | 381902  |         |         |



|                      |                             |                       |      |    |         |         |
|----------------------|-----------------------------|-----------------------|------|----|---------|---------|
| ykjB (42.6E-6)       | AAATCCCGACGTTTGCCCTCTTCAC   | CAACAGTGGCCAGGGAGGCTC | lag  | S  | 1092491 | 1092506 |
| malF (42.3E-6)       | AACACCAAAATATATGATGATTCAC   | TGGCAAGAGGAGGAGGCC    | lag  | AS | 1740489 | 1740504 |
| pi246 (42.1E-6)      | TTACTAGAAATAGCATACCCCTAC    | AGACATACCTTTAAATCGCA  | lead | AS | 1068667 | 1068682 |
| pdhC (41.9E-6)       | ATATCTCCCTTCATGCAATCCCTTAC  | CAATATCAGGCATCGTGAA   | lag  | AS | 61832   | 61847   |
| dexA (41.7E-6)       | CTTTCCCAATCAATGCAATCACTAC   | CATCCGTAACACCGCCGAT   | lead | AS | 1736112 | 1736127 |
| carA (41.1E-6)       | TTGCATCAGCAGCAATTTGACTTCAC  | CTCCAAATACATGGATAT    | lag  | S  | 1644318 | 1644333 |
| gltd (40.6E-6)       | GCAAAATCGAATTCACATGCTTCAC   | GGCCGTAATTTAAATC      | lead | AS | 1315740 | 1315755 |
| rpoB (40.6E-6)       | CGAATGTAGTGTTCACGAACTTCAC   | GGCTTTTTCACCAAGAT     | lead | AS | 1861909 | 1861924 |
| yfgG (40.5E-6)       | GCAACCCACAGATATTCACAGAC     | CACCTTGGATCTCCATAA    | lag  | AS | 564702  | 564717  |
| yugD (40.5E-6)       | ATTTGAAATCTCTCAGTGACTTCAC   | CAGTAATCCGATTTCTCTCC  | lead | AS | 2069410 | 2069425 |
| yljB (40.2E-6)       | GTAATATCCAGGCGATGACTTCAC    | ATCCAGTGGCTACTAACTC   | lag  | AS | 1192125 | 1192140 |
| leuC (40.2E-6)       | GTTCGTAAGAACCTGTTCACACTTCAC | TTGTAACAAATCCAAAGC    | lead | AS | 1243302 | 1243317 |
| relA (39.4E-6)       | CCCTTTGGTAATCTTGGACTTCAC    | CATTTGGAGGATGACADA    | lead | AS | 108400  | 108415  |
| yneH (39.2E-6)       | TCCGAAACAAATTTCTTCAAAAC     | CTTTATTTGAAAGCTATA    | lead | AS | 1346233 | 1346248 |
| bgIR (38.8E-6)       | ATTTTCTCTCTTCAACAACCTTCAC   | CTGCCTTTTCCCAATCC     | lead | AS | 1493676 | 1493691 |
| gntC (38.8E-6)       | ATATTTAGCTCCCTACTACTTCAC    | CAAGCTTAAGCCACATAC    | lead | AS | 2268969 | 2268984 |
| thiI (38.5E-6)       | CCAGCGATTACACTTTCCTTCAC     | CAAGCTTAAAGTGTGT      | lead | AS | 1612822 | 1612837 |
| noxE (38.2E-6)       | ATTTCTATCTTTTACAACTTCAC     | CTACATTCGCCCTGCCCTA   | lag  | S  | 397469  | 397484  |
| yjhd (38.2E-6)       | TCTCCATCTCGTTCATCACTTCAC    | CACCTTTTCCGCTTTT      | lead | AS | 972867  | 972882  |
| dexB (38.2E-6)       | TTTGTAAACCTGCTTCTCATTCAC    | TGGTCCATGGATTCGGCT    | lead | AS | 1525229 | 1525244 |
| fbxA (38.2E-6)       | TCGATGGAGCACTTCACTTCAC      | CAACGATCCCGCTCTTTC    | lead | AS | 1979853 | 1979868 |
| yjgD (37.8E-6)       | ATTTGCACTTTTGAATTCACACTTCAC | TTGCTTCCCTTCCGCTGT    | lag  | S  | 964023  | 964038  |
| parC (37.8E-6)       | TTGGCAATTTTTCTTAACTTCAC     | GAACCTCGCTTTCATTA     | lead | AS | 1012281 | 1012296 |
| intergenic (37.4E-6) | TATTTTCGAAATTCGACTTCAC      | ATGGCTTAAAAAGGAAGA    | lag  | S  | 1212453 | 1212468 |
| guaA (37.2E-6)       | CGAATCCGCTTTCGCCCACTTCAC    | CTTACTGGAAATCAGAT     | lag  | S  | 1517407 | 1517422 |
| yqgA (37.0E-6)       | GGTTTGTGTTATGTTAAACTTCAC    | GTCTCTGATGCGTGAAGC    | lag  | S  | 1662192 | 1662207 |
| butB (36.9E-6)       | ACTTTAGTCCGCTTACCTTCAC      | CTATAATTAATCCACCC     | lead | AS | 917656  | 917671  |
| rsuA (36.7E-6)       | TTTTCATACTTTTTCGACTTCAC     | TCGGCTTCCGAGGCCACT    | lead | AS | 2326760 | 2326775 |
| yniH (36.6E-6)       | GAACTCCGAGCTCAGACCCCTGAG    | CAACAGCTTCTTGGACATA   | lag  | AS | 1387665 | 1387680 |
| yvcC (36.2E-6)       | CAAGCCGCAATTTCTTTCCTTCAC    | ATGGGATGGAGCTCAATAG   | lag  | S  | 2127492 | 2127507 |
| tra983C (36.1E-6)    | TCAATCCCTTATGCCCCACTTCAC    | AGCATTGTTTAAATGAACTC  | lead | AS | 958140  | 958155  |
| ymcA (36.1E-6)       | ACATTAACACTTCTCTACTTCAC     | ATCAAGGGAATGTCGGCC    | lag  | S  | 1220304 | 1220319 |
| pil46 (35.8E-6)      | AAGTTCCGCGATGTTCTTCTTCAC    | TCGCTCGAGGATATCAGT    | lead | AS | 481528  | 481543  |
| rpsG (35.4E-6)       | TACATTTGGATCTGCAAACTTCAC    | GTTTGGGGCAGCATTT      | lead | AS | 2355006 | 2355021 |
| yber (35.2E-6)       | ATATTTATTTCCCAATCACTTCAC    | TGGATTTGGAGTATTATC    | lead | AS | 149884  | 149899  |
| ybeH (34.8E-6)       | TCATTTATTCATTTTCCCTTCAC     | CCGGGTGGGGCGGAAA      | lag  | S  | 142965  | 142980  |
| apl (34.0E-6)        | CGAAGAAACAAGATTTGTCATTCAC   | CTCTCTTAAATCCATTT     | lag  | AS | 719326  | 719341  |
| trmE (34.0E-6)       | CAAGCGGTCTCGAATCCGCSCTT     | CTTACAAATTTCTGCT      | lag  | AS | 2327760 | 2327775 |
| acca (33.4E-6)       | AAATGCTCTCCCTGAACCACTTCAC   | CTGTGATGAAGCAATAAT    | lead | AS | 790082  | 790097  |
| yudI (33.3E-6)       | AAAAATGGAAATTCRAAACTTCAC    | TTGGCAGCTCCCTCGAAT    | lead | S  | 2036722 | 2036737 |
| ctsR (33.2E-6)       | GACGAGCAAAATTCGACTTCAC      | AATTTGAGGATTCACCG     | lead | AS | 629551  | 629566  |
| infB (33.1E-6)       | TCTTGAACATTCATCTCTACTTCAC   | ATCAAGCACTTCTGGTA     | lead | AS | 776862  | 776877  |
| fusa (32.7E-6)       | TATCTCTCTATGGGTGAACCTTCAC   | TTGGACCTTCTGTTGACC    | lag  | S  | 2352871 | 2352886 |
| ybat (32.6E-6)       | CCAGCTAGTAAATGCTCTTCCTTCAC  | CAATATTTCTGAGAACT     | lag  | AS | 110171  | 110186  |
| vacB1 (31.9E-6)      | ACTTCCAAAACGCTCAATTCCTTGGT  | CATCTGCTTACCATAAAT    | lead | AS | 967655  | 967670  |
| pi214 (31.8E-6)      | ATAATCTCTCAACTGATGGACTTCAC  | AGGCTCCCAAGTCCACC     | lead | AS | 1044606 | 1044621 |
| pepD (31.4E-6)       | ACAAGTGTACAGGTTCTTCCTTCAC   | CCATCTGATTTTCCACATA   | lead | AS | 1601649 | 1601664 |
| yafB (31.3E-6)       | ACAATTGCTAATGGCTTCTTCAC     | CAACCATGCTAATGAGTCC   | lag  | AS | 51093   | 51108   |
| intergenic (30.6E-6) | ATTTATCAAAATTAAGAGCAATTTG   | GCCTTTTATCTGCTCAGC    | lag  | .  | 420472  | 420487  |
| pf1A (30.5E-6)       | AGCGGATATTTCCCACTCAATTCAC   | GCCTTTTAAATCTCCCAT    | lead | AS | 1880578 | 1880593 |
| pi146 (30.4E-6)      | ACAACCAAACTGGCTGGACTTCAC    | ATGCTCCACTCTGCTCA     | lag  | S  | 479371  | 479386  |
| hrcA (30.3E-6)       | GATTTCAACACTTTGGAGAACTTCAC  | TCGTAATTTGAAATAACG    | lead | AS | 977408  | 977423  |
| yxbD (30.3E-6)       | GCAGCTCAGCTTCTCTCTTCAC      | GTCCCTGCGAAGCAATGG    | lead | AS | 2319286 | 2319301 |
| truB (30.1E-6)       | GTTCGAAACCAATGTAACCTTCAC    | CTTCGTAAATTTTCCCTGC   | lead | AS | 1140585 | 1140600 |
| yrjG (29.9E-6)       | GAAATATTACGATTTTGAACCTTCAC  | GTAGGATTTCCCTGAGC     | lag  | AS | 1769976 | 1769991 |
| feoB (29.3E-6)       | GCTCTGTAAGTCCAACTCAACTTCAC  | CCATCTCTTTTAAATTTGT   | lag  | AS | 190202  | 190217  |
| ptnD (29.3E-6)       | GCCTCATCACTCGAGTTCAGCCAACT  | CCCATTTTTCATTCCTGCTC  | lag  | AS | 1764210 | 1764225 |
| ycfF (28.8E-6)       | GCCTGATGAAACCACTCAACTTCAC   | CAAGAACCTTTGTTAATAT   | lag  | AS | 257260  | 257275  |
| L200150 (28.6E-6)    | GGAAATTCCTACTCTCTCTTCCTTC   | TCAGTCTACACAGTTCCTCA  | lead | AS | 2222501 | 2222516 |
| yleF (28.4E-6)       | AAATGATCTGAACTCACCTACTTCAC  | TTATGATATAACTCAAAGT   | lag  | AS | 1147802 | 1147817 |
| y2hC (28.2E-6)       | AAATCATGCCAAATTTAACTTCAC    | ATAGCAACAAGTAGTGT     | lag  | AS | 273862  | 273877  |
| L200064 (28.1E-6)    | AGAGTCTTTCTATCCGAACTTCAC    | ATCCCACTTCCCAATTTA    | lag  | AS | 1718135 | 1718150 |
| glyA (27.5E-6)       | GTTCCTGGCGCTTTGCTTATTCAC    | GCCTGATGAAATTTGCTTA   | lag  | S  | 591480  | 591495  |
| ywaF (27.4E-6)       | CTATTTAAATGAGGATATCTGAAAT   | CATCTCAGGATTTTGT      | lag  | AS | 2205804 | 2205819 |
| uvrC (27.3E-6)       | AAATCCAAATATTTGGGGACTTCAC   | CAGTATCTGCAATGGTGT    | lag  | S  | 857817  | 857832  |
| mapA (27.3E-6)       | TAAACCAACAGCACTGGACTTCAC    | ATCCATCAAACTCTGGCT    | lag  | S  | 1729190 | 1729205 |
| argG (27.1E-6)       | TTGGCATATTCGATTTCTTCCTTCAC  | CGCCCATTTGCCATTCAG    | lead | AS | 127192  | 127207  |
| recD (27.0E-6)       | AAATGAGAACCTTTCTCTCTTCAC    | GAATTTTCANATCCCA      | lead | AS | 1797764 | 1797779 |
| ykhD (26.9E-6)       | AGCACTTCTGTTCTATGCTCTTCAC   | CACCTGGCCATTTCTGCC    | lag  | AS | 1072513 | 1072528 |
| chiA (26.9E-6)       | GTGGCTGTAGAGCACTCACTTCAC    | TATTTGTAATTTGGGGAA    | lag  | AS | 2027631 | 2027646 |
| glmM (26.8E-6)       | TTTCTGGTAATACTGTAACCTTCAC   | TTGCAATTTCACTAAAGA    | lead | AS | 436154  | 436169  |
| intergenic (26.4E-6) | TCACTTCTATTAATTAACATACT     | CATCTATTTTACCATAAAT   | lag  | .  | 565292  | 565307  |
| ftsK (26.4E-6)       | CCAACTTGACTTTCTCTCTTCAC     | CAGGCTCAAAGCTTTCTGC   | lead | AS | 1704506 | 1704521 |
| ywcC (26.4E-6)       | GCCTGGTTCAAACTCTACTTATA     | TCACTCTGCAATAAAGGA    | lead | S  | 2228600 | 2228615 |
| ps311 (26.3E-6)      | AAAGATATAAATTTCTACAACTTCAC  | TTCCTGTGAAGCTCAAGC    | lag  | S  | 2021044 | 2021059 |
| yjiI (26.1E-6)       | ATAACGAACTTTAGCCGAGAGT      | TCTCCACAGCAAGTTTAA    | lag  | S  | 889057  | 889072  |
| typA (25.8E-6)       | GAAACTTGAACCTCATTTCTTCAC    | GGCCGATTTCTTCAATAG    | lead | AS | 2093373 | 2093388 |
| acmC (25.7E-6)       | GCATATGTCGGCTCTGTTCCTTCAC   | CAATATTTTGAACGCTTT    | lag  | AS | 1402971 | 1402986 |
| yjce (25.3E-6)       | TCTCTCCACTCACTTAACTTCAC     | GAATATTTAGCCGTAATGG   | lead | AS | 926233  | 926248  |
| als (25.3E-6)        | CTGGAACTCCAAATTCATCTTCAC    | TTATTTGTAATTTGAACTA   | lead | AS | 1200491 | 1200506 |
| pgi (25.3E-6)        | TAAATCCGTTGTTGCTTTCCTTCAC   | GCCTGATTTTCTACTA      | lead | AS | 2245042 | 2245057 |
| yobI (25.1E-6)       | AACTGTTTCCAACTGACCTTCAC     | TCAATAATTTCTCTCTGG    | lead | AS | 218254  | 218269  |
| ypfF (25.1E-6)       | TATTTGGTTAATAAAGGAACTTCAC   | GTGTTCTCTGCTCCGAAAT   | lag  | S  | 1558390 | 1558405 |
| carB (24.9E-6)       | CCATCACTAATTCGACTTCAC       | ATTCACCTCACTTAAATA    | lead | AS | 1399224 | 1399239 |
| pi214 (24.8E-6)      | TTTTCGATTCATTTGGCAGACTTCAC  | ATCCAACTCAAGTGAATA    | lag  | S  | 1045075 | 1045090 |
| yqbr (24.8E-6)       | ATAGTTAACAATCATCATCTTCAC    | ATCCGGTCAAGCTTATTT    | lag  | S  | 1623170 | 1623185 |
| hisT (24.6E-6)       | TTTCTCTAGCAATAATCACTTCAC    | TTGCTTTTCTTCCACTTT    | lead | AS | 1237413 | 1237428 |
| ftsK (24.5E-6)       | TAGCTCAACCTTCACTAACTTCAC    | TTGCTTTGGCAAGCTTTC    | lead | AS | 1705152 | 1705167 |
| kupB (23.9E-6)       | AGATATTTCCAAAGCAATCACTTCAC  | CACATTAATGCTCCGTTG    | lead | AS | 613026  | 613041  |
| rplN (23.9E-6)       | ACGATGACTGCTTTTCAAACTTCAC   | CTTTTTCACCTCCCTCAC    | lead | AS | 2164972 | 2164987 |

|                      |                               |                       |      |    |         |         |
|----------------------|-------------------------------|-----------------------|------|----|---------|---------|
| mtsC (23.6E-6)       | AAAATGATAATTCTCTCCCTCCTC      | TGGGGCAGCTTTCTCCTCCT  | lag  | S  | 1350292 | 1350307 |
| pepDA (23.5E-6)      | CAGGACACGCTGAGAGGACCTCAC      | AACATATTACCCCTCCCTAT  | lead | S  | 249419  | 249434  |
| ptsI (23.1E-6)       | ATATCATCATGATCCCTACCTCGA      | TCCATCAGCACTGGGAAC    | lead | AS | 121915  | 121930  |
| ywaI (23.1E-6)       | TTGAATTCAGATTTATCTCCACCC      | CATGAATTTGAAATTCATT   | lag  | AS | 2208802 | 2208817 |
| rpsc (23.0E-6)       | TCAAAGTGTATGCAATTCCTTCAC      | CAACAAGTAGGAGCCGCGAA  | lead | AS | 2166372 | 2166387 |
| ywff (23.0E-6)       | GGATTCAAAGCCTTAACTCCTTCAC     | CATAAAGTACATGGCTTGG   | lead | AS | 2255016 | 2255031 |
| intergenic (22.7E-6) | GCTCTCAAACTCAAGCTACCTCCG      | GGACATGAAGTCTTGACG    | lead | .  | 282945  | 282955  |
| yleF (22.5E-6)       | CCCCGATTTCGATTTTATCTTAAAT     | TGAGCTGGGATTTCAGAA    | lag  | S  | 1147818 | 1147833 |
| yidE (22.2E-6)       | AAAATTTTCCCTTTTGAACCTTCAC     | AGGTGTGAGCGCCATGGAG   | lead | AS | 835562  | 835577  |
| yogA (22.1E-6)       | CTTCTATTGCAATTCCTACCTTCCT     | ATCTCCGCGGACTATCTA    | lead | S  | 1460644 | 1460659 |
| glyS (22.0E-6)       | TGTCATTTGATGGCACAACCTTCAC     | GCACCTTTAAACACCGAA    | lag  | S  | 1104472 | 1104487 |
| ypfF (22.0E-6)       | GCCTTATGATGACCCACTTCCTCAC     | TAATAAGCAATTTCTCAAA   | lead | AS | 1558342 | 1558357 |
| ytgF (21.9E-6)       | CGACCCGCTTTTGTCTCTCTTCAC      | GAAGGGTGAACGGGCTTC    | lead | AS | 1968538 | 1968553 |
| ylcC (21.7E-6)       | TTTAAAGGGCTTGGCAATTCCTTCAC    | TTTATATGGGAGCGGGAAC   | lag  | S  | 1125903 | 1125918 |
| yceE (21.6E-6)       | AGCGAATAATTTTACCGCACTTCAC     | GAATATATTTTATAGTCC    | lead | AS | 247324  | 247341  |
| rnaB (21.6E-6)       | TTACAAAACCTTTCCATCTTCCTCAC    | CAACCGGAGCTTTGAGGCG   | lead | AS | 714999  | 715014  |
| ynjG (21.6E-6)       | CTCACGACCTTAAACCTACCTTCAC     | AGGTAACAATTTAGTCC     | lag  | S  | 1394984 | 1394999 |
| pepP (21.2E-6)       | TTTCCGGCTTTGTTAAGACTTCAC      | AGCCATTTCTCCTACTAA    | lead | AS | 691432  | 691447  |
| intergenic (21.2E-6) | ATGCTAAACCCCTCATAGCTTTTAA     | TGGTATTAATAAAGAAAA    | lead | .  | 1133651 | 1133666 |
| llrA (20.7E-6)       | TCAACGGCAATGACATGCTCTTCAC     | GTCCGAGAAACCTCGAAC    | lead | AS | 1639102 | 1639117 |
| alas (20.3E-6)       | GTGCCTTCAAAGTTCCTTCCTTCAC     | GATCAATAATTTGCATGAT   | lead | AS | 1779915 | 1779930 |
| yfgG (20.0E-6)       | AAAAATGGCTTCAATGATTGGTATT     | GCAAGAAGCAATTTATATTC  | lag  | S  | 568993  | 569008  |
| intergenic (20.0E-6) | ATTTTAAAGAGATTATCGTGGGATT     | ATTCATTTAAACGACAT     | lead | .  | 966884  | 966899  |
| ps315 (20.0E-6)      | CTAAAGAGAGCGCCCAACTCTTCAC     | GGTTCATTCCTCTTTTAGT   | lag  | AS | 2023699 | 2023714 |
| prfA (19.6E-6)       | TTATCCGTAATTTCTGCTCTTCAC      | GCGTATTCCTCAAAACG     | lead | AS | 586052  | 586067  |
| yjaJ (19.6E-6)       | TCTCCGGGAAAACATAAGCTTGT       | CTCCGTGTAAGAGCCGCT    | lead | AS | 909737  | 909752  |
| vacB1 (19.5E-6)      | TGTAATAATAATGGTTGAACCTCAC     | CATAATTTAGAGCCATGC    | lag  | S  | 968272  | 968287  |
| ybfd (19.4E-6)       | TTATCTCTTTTTCCTCCCTACT        | GTTCATTTGGTCAATGG     | lead | S  | 158550  | 158565  |
| rmlC (19.3E-6)       | CCAGAGGCGCACACTGCTCTTCAC      | CAAGATGTTAGTCCGCTCC   | lead | AS | 200761  | 200776  |
| ynpE (19.2E-6)       | AGCTTTCCTTTACGTGGACTTCAC      | GTCCGAGAAACCTCGAGG    | lag  | AS | 1365714 | 1365729 |
| pknB (19.1E-6)       | GCGAAGGCACTCTCTGAACTTCAC      | TTACCAACAATATCAAT     | lag  | S  | 1956462 | 1956477 |
| ybeF (19.0E-6)       | ACTTTTACTTTGCTTCTCTTCCTCAC    | CTGCAATGCAATAAAGTAAAC | lead | AS | 153682  | 153697  |
| gltD (19.0E-6)       | ATTCGGGCTGTTTTCTCTCTTCAC      | GGATGCCCAATTAACAA     | lead | AS | 1315143 | 1315158 |
| yjfJ (18.6E-6)       | CGCGTGTTAATCGAATACTTCAC       | CATAAGCTTCAGTAAATCG   | lead | AS | 959323  | 959338  |
| yljF (18.5E-6)       | CCGCGGCAAAAACGAGCCCTTCAC      | CTGTAGAGAGATTCCTT     | lead | AS | 1197029 | 1197044 |
| rpmA (18.2E-6)       | AAAAAAGGTCGGGTCTCACTTCCA      | ATGGAAGGCACTCAAGC     | lag  | S  | 1091336 | 1091351 |
| pdbB (18.1E-6)       | GTATAGAACCTTACGGAACCTCAC      | CTTAAAGTGGCCGATAAAG   | lag  | AS | 62610   | 62625   |
| celB (18.1E-6)       | TTAATTAACAAGCCCTCTCACTTCCA    | ACTCACCCACAAAGGTA     | lag  | S  | 178484  | 178499  |
| intergenic (17.8E-6) | ACTTCCATATCCCTTTTACTTCAC      | CTTAAATTAATCTTAAATA   | lead | .  | 1987040 | 1987055 |
| yahC (17.7E-6)       | GAGCGATAAACTCTTCAAACCTCGCG    | AATTTCTCTCTCAAGCTTAA  | lag  | S  | 74058   | 74073   |
| rbgA (17.7E-6)       | GATGCTCGTCTCCCTATTTCTTCAC     | GTAACTCGAATCTGGGGCA   | lag  | S  | 1329921 | 1329936 |
| ps105 (17.6E-6)      | CAAAACCTAAATAGAGGACTTCAC      | AGATATGGCGAAGACGGC    | lead | S  | 39194   | 39209   |
| lepA (17.5E-6)       | CGACCAATAATCGAATCTCAATAT      | CAACCTGGCAATTAACCTTT  | lead | AS | 1118787 | 1118802 |
| pppI (17.2E-6)       | ACTTCAATATCTGCTTGAACCTTCAC    | TAGTGTGCCAAGTGAAC     | lead | AS | 1957232 | 1957247 |
| ybaB (17.0E-6)       | AAAAATCGAGTTGTCATCTTCCTCAC    | AGTAAATGACACTCGAACC   | lead | AS | 103218  | 103233  |
| lysC (17.0E-6)       | GCTCCGGGAACCAAACTCTCAATAT     | CAATCCGCGCTCTCTTAA    | lead | AS | 369938  | 369953  |
| yqkR (17.0E-6)       | GTTCCTGAGTACCTCCACTGGGAC      | TACTAATTAAGTACTCCAGC  | lead | AS | 1622667 | 1622682 |
| ybeF (16.9E-6)       | CCATTTTCTCGGATCTCCCTTCAC      | GAATTAATTAATCTTAT     | lead | AS | 152104  | 152119  |
| eno (16.9E-6)        | CCATCTCTTAATCAACTCTTCCTCAC    | GGTCTCCAGTGTATGCTCC   | lead | AS | 274299  | 274314  |
| arat (16.7E-6)       | TAAGATAACCGGACAAATCTTCCTCAC   | CGTACGACCAAAACGGAT    | lead | AS | 57646   | 57661   |
| pi214 (16.7E-6)      | AAGTAAAGTCTCACTCACTTCCTCAC    | CTTTCTCAATCTTGGATA    | lead | AS | 1044675 | 1044690 |
| rpsC (16.7E-6)       | CGTGGTGAAGTCTCTCTCACTTCAA     | AATCTTGGAAAGCGAAAA    | lag  | S  | 2166072 | 2166087 |
| comFC (16.6E-6)      | CCPTTGGTTCCTTCTCTATTCCTCAC    | CAABAAGATAAGGGAACG    | lead | S  | 1096611 | 1096626 |
| gidC (16.6E-6)       | TTGGAGTTCACCTTACTTCACTCAC     | CCATATGACAGCAAAAT     | lag  | S  | 1257952 | 1257967 |
| ycgI (16.5E-6)       | TTCAAGAGAAATTTTGCACACTTCAC    | TTACATGCTTCTGGGCT     | lag  | S  | 267947  | 267962  |
| yciH (16.5E-6)       | AAATATATTCATCAGGTGTCAATAT     | CAATGGGCAACAATGTGT    | lag  | AS | 289429  | 289444  |
| intergenic (16.5E-6) | ATCAAGAGAACCCTCCAACTTCAA      | AGAGGGCCCAATCCCAAT    | lead | .  | 2267063 | 2267078 |
| intergenic (16.4E-6) | TTAAACAAAGTTATTTACTTCCTCAC    | ATTAATTAATTAAGTCAAGG  | lead | .  | 308448  | 308463  |
| agl (16.4E-6)        | CAGATTAATACTCACTCCCAATTCAC    | GTAGATTAAGGAATTTTTC   | lead | AS | 1732727 | 1732742 |
| ftsB (16.3E-6)       | TAAGCTTGAAGTTTAACTTCCTCAC     | TCTAGATTAAGCTTAAAG    | lead | AS | 26157   | 26172   |
| pnrB (16.0E-6)       | CCAAAGGCAATTAATTTCTCTCTCAC    | CATGATTTCTTCTGAAAG    | lag  | AS | 130558  | 130573  |
| riba (16.0E-6)       | ATTAATAAAGTCTCTGCTTCTCAC      | TTCAGATTAAGGACTTGA    | lag  | S  | 1024702 | 1024717 |
| argG (15.9E-6)       | CAGATTCGACTGCCCTTCTTCCTCAC    | CCCTTCACTCAATTAATA    | lead | AS | 126892  | 126907  |
| purI (15.9E-6)       | TCTTCAATCGCTGCTCCCACTTCAC     | GGTATATTTGCTCTCTG     | lead | AS | 1576342 | 1576357 |
| fhs (15.8E-6)        | TCCGCCAAATCTTAACTCACTTCCTCAC  | CACTCCCTTACCAAGACTTG  | lead | AS | 960993  | 960999  |
| llrF (15.8E-6)       | GATTTATGACAAATCTGTATCTTCT     | CAATTTCTTCCGAATTTAA   | lead | AS | 1727031 | 1727046 |
| yshA (15.6E-6)       | CAAGCCTCTGCACTTCTCACTTCCTCAC  | GCAGACTTAAGCTTGGTGG   | lag  | S  | 1876038 | 1876053 |
| vacB2 (15.4E-6)      | TCPAATAATCTCTCTCACTTCCTCAC    | CTTATCTCCAATTAATCC    | lead | AS | 1226666 | 1226681 |
| ydsB (15.4E-6)       | TGACCAATTAAGCCATAACTTCCTCAC   | CTGGCTTAACAACCAATAT   | lead | AS | 1835702 | 1835717 |
| yqgA (15.0E-6)       | CTTGAAGTTGACGCTCTTCCATAAC     | TACTGGTAGAAATCTCTGGT  | lead | AS | 1662046 | 1662061 |
| infB (14.9E-6)       | CCATCATTAATCAACCACTTCCTCAC    | GAATGACCGGACGAAGC     | lead | AS | 778425  | 778440  |
| gltB (14.9E-6)       | TTACCTGGCAATTCGCTCACTTCCTCAC  | CTGCTTAGCACTTCCGA     | lead | AS | 1318175 | 1318190 |
| gntK (14.9E-6)       | CCCCGGAAATGTTTGCCTCACTTCCTCAC | CCGTGACTTCACTTAAAG    | lead | AS | 2269167 | 2269182 |
| groES (14.8E-6)      | CCATGATGATTTGTTTCTCTTCCTCAC   | CGACGGCAACAACCTTCAGC  | lead | AS | 398636  | 398651  |
| L200015 (14.8E-6)    | TGAGAAAGTAAATTAATCAAACTTCAC   | TTGCTTCTTCCAACTTCAAC  | lead | AS | 456625  | 456640  |
| pi115 (14.8E-6)      | TGAGAAAGTAAATTAATCAAACTTCAC   | TTGCTTCTTCCAAATCAAC   | lead | AS | 456625  | 456640  |
| fhs (14.8E-6)        | ACGCTAATACTCAAACTATCTTCAC     | GGGGCAGACCACTTAAAG    | lead | AS | 960324  | 960324  |
| nifs (14.8E-6)       | AACGCTGTACACAGCTCTCTCTCAC     | CTGAATTAATCAACCCGAAT  | lead | S  | 1927818 | 1927833 |
| accC (14.7E-6)       | TCTTCTCTTACAGCAATTCATTCAC     | CATTTGGTACAGCAATCTG   | lead | AS | 788253  | 788268  |
| dnad (14.7E-6)       | ACCTTTCGATTTGAGGACTCTTCCTCAC  | GCAAGGCTTCTTAAATCA    | lead | AS | 1083630 | 1083645 |
| sbcC (14.7E-6)       | TTAGCTGTATTTGTACGACTTCCTCAC   | TTAAGCCAAAGCAATTCGA   | lead | AS | 1353084 | 1353099 |
| ynpG (14.7E-6)       | AGCACTCCGATTTTCTCACTTCCTCAC   | GTTCCTTCAACAGGCTC     | lead | S  | 1368503 | 1368518 |
| trmE (14.7E-6)       | GATGATGTGGAACAATGACTTCCTCAC   | AAATGCTCCCTTCAAAAC    | lead | S  | 2328325 | 2328340 |
| ydaG (14.2E-6)       | TGATAATGCGCAATTAATCAATTCAC    | CATAAATCTCAAGTAAAT    | lead | AS | 309995  | 310010  |
| snf (14.1E-6)        | TCTAAGCTCAATCTTACCTTCCTCAC    | CATCAATTTCTCTGTAG     | lead | AS | 2123594 | 2123594 |
| L200121 (14.1E-6)    | CAGACTCAAAATCTGGTTCCTTCCTCAC  | GGGAGTCCCGGTCGACCC    | lag  | S  | 2340443 | 2340458 |
| ldhX (13.9E-6)       | TGAGCAATAAGTCTCTCACTTCCTCAC   | CACTTCAACAACTTCAAC    | lag  | AS | 1142441 | 1142456 |
| yohC (13.9E-6)       | GAACTCTTGTCTGACCTCTCTCTCAC    | GGTCCCTTGGCAATCA      | lead | S  | 1472006 | 1472021 |
| ywjH (13.9E-6)       | AAATCAATTAACCACTTAAATATTC     | CATTAATTTTCTGGGCA     | lead | AS | 2299858 | 2299873 |
| yrfC (13.8E-6)       | GCAATCAAAATCTCTCACTTCCTCAC    | GTGCGACTTCTCTTCAAC    | lead | AS | 1753200 | 1753215 |

|                      |                            |                      |      |    |         |         |
|----------------------|----------------------------|----------------------|------|----|---------|---------|
| secA (13.5E-6)       | TTCAATACGATTCAAAACCTCTC    | CGCAAGTAAATAAACTGT   | lag  | S  | 117488  | 117503  |
| ftsY (13.5E-6)       | CCAGCTGGTTTGTGACACTTCA     | CGCCGACGATTTCCCA     | lead | AS | 825016  | 825031  |
| trxB2 (13.5E-6)      | GCATTATCGCTGGACCTTAC       | CAAAACAACCGGCACTCA   | lead | AS | 1694915 | 1694930 |
| intergenic (13.4E-6) | CAATCAACCTTTTGCAAAACCTAC   | AAGAAGTGAAGGCAAGAT   | lag  | .  | 1702217 | 1702232 |
| yucF (13.4E-6)       | GCTTCCAAAATTCAACGACTTAC    | TTTCAAACCTTTTCTTAAG  | lag  | AS | 2025914 | 2025929 |
| purA (13.4E-6)       | CGACGCAAAAGTTCAAACTTAC     | CTTAATCCATCAGGAATTT  | lag  | S  | 2029866 | 2029881 |
| L200158 (13.4E-6)    | ATAGAAATACCGTCCCTATTCA     | TGGCCCTTACCATTCCCTGT | lead | AS | 2361099 | 2361114 |
| yuaD (13.3E-6)       | CGCCGACGCGTCTCTTAACTTAC    | CTTGGTTCACACTTATA    | lead | AS | 2005245 | 2005260 |
| yahG (13.2E-6)       | AAAGCTCAATCCTTTTCTTAC      | ATGACCAATGAAATCAATTA | lead | S  | 73337   | 73352   |
| yohG (13.2E-6)       | GTCATAAATATGTATGATTAATTT   | AAGGAGTAAAGATGATTC   | lag  | S  | 1479677 | 1479692 |
| ycfF (12.9E-6)       | AAGTCTTCAAGCATTTCTTACCG    | GATAACAACCTCAGTAC    | lead | S  | 256796  | 256811  |
| ksgA (12.8E-6)       | AACATTTCTTCTTTTCACTTCA     | CCAAAGCTTCTCCGACG    | lead | AS | 690090  | 690105  |
| rmeA (12.5E-6)       | TCGTTCAAGATTTCTTCAATTAC    | TGATGCCAATAAAGGGGTC  | lead | AS | 1947036 | 1947051 |
| ygiI (12.4E-6)       | TTGGCTGGCATCCTGATGATGCTG   | TGAAATTGAAAGACCAAGCT | lag  | S  | 687601  | 687616  |
| yibG (12.4E-6)       | AAAAGACAGCTCCATTCCTCCAC    | CAAGAGCAATCATAGTAAT  | lag  | AS | 819874  | 819889  |
| yljF (12.4E-6)       | GAAAAGTTTCTCTGCTCACTTAC    | CAAAATGAACATCGATTT   | lead | AS | 1195988 | 1196003 |
| oppA (12.3E-6)       | TAGTCAAGGCTATCTCCACACAC    | GTTTGTAAACGGGGCTTA   | lead | AS | 1905177 | 1905192 |
| yciH (12.2E-6)       | AGTCCGAAACCTGCTGACTTAC     | CGAAAGGCAACTTGGAA    | lead | S  | 290530  | 290545  |
| glbB (12.2E-6)       | CGTTTTGAATTTTCAACCTTAC     | CCGAAATGGATTTTGCACC  | lead | AS | 1318322 | 1318337 |
| yneG (12.2E-6)       | GAAAGCTCTGACAGTCTTCTTAC    | ATCCGAGATTTTGAAGTAA  | lead | AS | 1345665 | 1345680 |
| llrC (12.1E-6)       | TTAAATGCTTCAACGCTTCTTAC    | CATCAAAAGCTTAAGAC    | lag  | AS | 403590  | 403605  |
| ypcD (12.1E-6)       | GACGGAATTACATTAATCTTAC     | CACAAGGCCACCCCAATA   | lead | AS | 1524368 | 1524383 |
| clpB (12.1E-6)       | TGACCAAGCTAATCTCCGTTGATG   | CAATAGAAAATCAGAAAG   | lag  | S  | 1567980 | 1567995 |
| yiiB (12.0E-6)       | CCAATGAAAAGCCACCTACTCCAC   | CAACAATTAATGTAGTAA   | lead | AS | 892941  | 892956  |
| yniC (12.0E-6)       | CGATAAATGAAATTAATTAATAC    | TTTTTGGTCTGTACTTGG   | lag  | S  | 1381911 | 1381926 |
| yniH (12.0E-6)       | ACAGCTCTTCCGACAAACCTTAC    | GGATAGAGGGGCTCCAAG   | lag  | AS | 1387638 | 1387653 |
| ycfD (11.9E-6)       | ATGATTGCTCCGACCTCCCTTACT   | TTGCCAGAAAAGGTAAAAA  | lag  | S  | 253569  | 253584  |
| ispA (11.7E-6)       | GCTAATGTCAACTCTTTTCCCTTAC  | CGCCATAACCAAGATTGG   | lead | AS | 881208  | 881223  |
| tpx (11.6E-6)        | TCAGAAAGCTCTGACAAAACCTTAC  | TATAAGACAATTTGCCAAT  | lead | AS | 302128  | 302143  |
| yeeA (11.6E-6)       | CCATAAGAACCTTTCCTTACTTCTT  | TTTTATCAATTTGGATAT   | lead | AS | 439614  | 439629  |
| ybdC (11.4E-6)       | TTTTCGACCTTCACTTACTTCTTAC  | GCCCGCAAAATTTTCTTA   | lead | AS | 132561  | 132576  |
| yvhB (11.4E-6)       | TTTCATATTCTTCTCACCGCTTAC   | CCCAAGCCAACGCTGAT    | lag  | S  | 2175732 | 2175747 |
| yafC (11.3E-6)       | GAGTCACTTACTTCTCTTACTTCTAC | TCAAAGACCGCTTCCAAC   | lead | AS | 55779   | 55794   |
| araT (11.3E-6)       | TTAATATCTGTCACATAATTAC     | GCGCTGCAAGATTAATCC   | lead | AS | 57325   | 57340   |
